# Supplementary material for: Class-weighted Dempster–Shafer in dual-level fusion for multimodal fake real estate listings detection
Source: PeerJ Comput Sci. 2025 May 27;11:e2797. doi: 10.7717/peerj-cs.2797 (PMC12190670; doi:10.7717/peerj-cs.2797)
Supplement: Supplemental Information 2 [file peerj-cs-11-2797-s002.xlsx]

## Sheet: Sheet1
id	cluster	id.1	Price	Built_Up_SF	Bathroom	Furnishing	Bedroom	Tenure	Car_Park	Desc	Place	Area	Negeri	Property_Type	Property_Address	Latitude	Longitude	Occupancy	Unit_Type	src	cleaned_desc	stemmed1	tokenized	label	label2	image_name	image_name2	Filename	label_preprocess	label_preprocess2	filename	Unnamed: 2
74	0	74	270000	1236	2	0	3	0	3	You may view Residensi Seremban Sentral PRIMA Profile here.	Residensi Seremban Sentral PRIMA	Seremban	3	0	Residensi Seremban Sentral PRIMA, Seremban	2.65892	101.875	0	1	https://cdn.durianproperty.com.my/images/classified_ads/300624811730960.JPG	may view residensi seremban sentral prima profile	may view residensi seremban sentral prima profil	['may', 'view', 'residensi', 'seremban', 'sentral', 'prima', 'profil']	0	notfake	300624811730960.JPG	300624811730960	300624811730960.JPG	FAKE	1	300624811730960.JPG	JPG
113	0	113	1550000	348480	0	0	0	0	0	Tell Gary Chow you saw this ad from DurianProperty to get best deal.Description Type : Freehold Oil Palm Land Tanjong Malim Land Size : 8 Arce + Tenure : Freehold Land : Flat & Gentle Slope District : Mualim Next to Plus highway Ideal land convert to Orchard (eg : planting durians, jack fruits and others fruits) Sutaible for Petrol Station Approx 1 hour from Kuala Lumpur Approx 10 min from Tanjon…	Muallim	Perak	5	5	Muallim, Perak	3.72464	101.524	0	0	https://cdn.durianproperty.com.my/images/classified_ads/296639011976569.jpg	tell gary chow saw ad durianproperty get best deal description type freehold oil palm land tanjong malim land size arce tenure freehold land flat gentle slope district mualim next plus highway ideal land convert orchard eg planting durians jack fruits others fruits sutaible petrol station approx hour kuala lumpur approx min tanjong malim plus toll good location investment asking price rm lump sum…	tell gari chow saw ad durianproperti get best deal descript type freehold oil palm land tanjong malim land size arc tenur freehold land flat gentl slope district mualim next plu highway ideal land convert orchard eg plant durian jack fruit other fruit sutaibl petrol station approx hour kuala lumpur approx min tanjong malim plu toll good locat invest ask price rm lump sumyou may view muallim profil	['tell', 'gari', 'chow', 'saw', 'ad', 'durianproperti', 'get', 'best', 'deal', 'descript', 'type', 'freehold', 'oil', 'palm', 'land', 'tanjong', 'malim', 'land', 'size', 'arc', 'tenur', 'freehold', 'land', 'flat', 'gentl', 'slope', 'district', 'mualim', 'next', 'plu', 'highway', 'ideal', 'land', 'convert', 'orchard', 'eg', 'plant', 'durian', 'jack', 'fruit', 'other', 'fruit', 'sutaibl', 'petrol',…	0	notfake	296639011976569.jpg	296639011976569	296639011976569.jpg	FAKE	1	296639011976569.jpg	jpg
241	0	242	588000	1269	2	0	4	0	2	Tell TAN CHUN LIM you saw this ad from DurianProperty to get best deal."High End Condo for FIRE SALE" Penthouse Unit with amazing view and sunset. Ultra clear ceiling height of about 11.5 ft (up to soffit of plaster ceiling) Double Slab roof system (no leak issue) Super balconyYou may view Cloudtree Profile here.	Cloudtree	Bandar Damai Perdana	0	0	Cloudtree, Bandar Damai Perdana	3.04705	101.731	0	1	https://cdn.durianproperty.com.my/images/classified_ads/299466111654375.jpg	tell tan chun lim saw ad durianproperty get best deal high end condo fire sale penthouse unit amazing view sunset ultra clear ceiling height ft soffit plaster ceiling double slab roof system leak issue super balconyyou may view cloudtree profile	tell tan chun lim saw ad durianproperti get best deal high end condo fire sale penthous unit amaz view sunset ultra clear ceil height ft soffit plaster ceil doubl slab roof system leak issu super balconyy may view cloudtre profil	['tell', 'tan', 'chun', 'lim', 'saw', 'ad', 'durianproperti', 'get', 'best', 'deal', 'high', 'end', 'condo', 'fire', 'sale', 'penthous', 'unit', 'amaz', 'view', 'sunset', 'ultra', 'clear', 'ceil', 'height', 'ft', 'soffit', 'plaster', 'ceil', 'doubl', 'slab', 'roof', 'system', 'leak', 'issu', 'super', 'balconyy', 'may', 'view', 'cloudtre', 'profil']	0	notfake	299466111654375.jpg	299466111654375	299466111654375.jpg	FAKE	1	299466111654375.jpg	jpg
242	0	243	8000000	43488	3	0	3	1	3	Tell Nelson Yap you saw this ad from DurianProperty to get best deal.1 acre (43,488 sq ft) commercial land for sale. Located at Taman Puncak Jalil facing mainroad Persiaran Puncak Jalil Leasehold title 2103 Land dimension 203.5 ft (62 m) x 213 ft (65 m) Selling RM 8 million Please contact Nelson Yap @ 016 3328637to arrange site viewing Midas Properties E(3)0677Please see more of my listings at ht…	Taman Puncak Jalil	Seri Kembangan	0	5	Taman Puncak Jalil, Seri Kembangan	3.01707	101.676	0	0	https://cdn.durianproperty.com.my/images/classified_ads/300300911707588.jpg	tell nelson yap saw ad durianproperty get best deal acre sq ft commercial land sale located taman puncak jalil facing mainroad persiaran puncak jalil leasehold title land dimension ft x ft selling rm million please contact nelson yap to arrange site viewing midas properties e please see listings may view taman puncak jalil profile	tell nelson yap saw ad durianproperti get best deal acr sq ft commerci land sale locat taman puncak jalil face mainroad persiaran puncak jalil leasehold titl land dimens ft x ft sell rm million pleas contact nelson yap to arrang site view mida properti e pleas see list may view taman puncak jalil profil	['tell', 'nelson', 'yap', 'saw', 'ad', 'durianproperti', 'get', 'best', 'deal', 'acr', 'sq', 'ft', 'commerci', 'land', 'sale', 'locat', 'taman', 'puncak', 'jalil', 'face', 'mainroad', 'persiaran', 'puncak', 'jalil', 'leasehold', 'titl', 'land', 'dimens', 'ft', 'x', 'ft', 'sell', 'rm', 'million', 'pleas', 'contact', 'nelson', 'yap', 'to', 'arrang', 'site', 'view', 'mida', 'properti', 'e', 'pleas',…	0	notfake	300300911707588.jpg	300300911707588	300300911707588.jpg	FAKE	1	300300911707588.jpg	jpg
266	0	268	666000	2335	5	1	5	1	3	Tell Connie Chew you saw this ad from DurianProperty to get best deal.PUCHONGS NEWEST >> LAKEFRONT RESORT LIVING A stunning lakefront condo in Puchong that promises luxurious lifestyle living amidst a resort setting. Selected units are designed to offer unobstructed panoramic views of the lake and beyond, right from its balcony. With so much living space to play with, you can enjoy the creativity…	Taman Putra Impiana	Puchong	0	0	Taman Putra Impiana, Puchong	2.97728	101.602	0	0	https://cdn.durianproperty.com.my/images/classified_ads/279793911619693.jpg	tell connie chew saw ad durianproperty get best deal puchongs newest lakefront resort living stunning lakefront condo puchong promises luxurious lifestyle living amidst resort setting selected units designed offer unobstructed panoramic views lake beyond right balcony much living space play enjoy creativity planning decorating ideal home world lifestyle activities awaits savour exciting moments r…	tell conni chew saw ad durianproperti get best deal puchong newest lakefront resort live stun lakefront condo puchong promis luxuri lifestyl live amidst resort set select unit design offer unobstruct panoram view lake beyond right balconi much live space play enjoy creativ plan decor ideal home world lifestyl activ await savour excit moment right besid lake rejuven resid clubhous kid look forward…	['tell', 'conni', 'chew', 'saw', 'ad', 'durianproperti', 'get', 'best', 'deal', 'puchong', 'newest', 'lakefront', 'resort', 'live', 'stun', 'lakefront', 'condo', 'puchong', 'promis', 'luxuri', 'lifestyl', 'live', 'amidst', 'resort', 'set', 'select', 'unit', 'design', 'offer', 'unobstruct', 'panoram', 'view', 'lake', 'beyond', 'right', 'balconi', 'much', 'live', 'space', 'play', 'enjoy', 'creativ'…	0	notfake	279793911619693.jpg	279793911619693	279793911619693.jpg	FAKE	1	279793911619693.jpg	jpg
320	0	324	1050000	1710	4	2	4	0	2	Tell Vincent Lau you saw this ad from DurianProperty to get best deal.**Le Yuan Residence @ Kuchai Lama** (Condominium unit) for SALE Property Info: - Build up : 1,710 sqft - 4 Bedrooms, 4 Bathrooms, 2 Carparks - FREEHOLD - FULLY FURNISHED - RENOVATED - BEACH & SWIMMING POOL VIEW - NICE GREENARY - Gated & Guarded (24-hours security) - Facing South - With facilities - Nice location - Well maintain…	Le Yuan Residence	Kuchai Lama	1	0	Le Yuan Residence, Kuchai Lama	3.07905	101.689	0	0	https://cdn.durianproperty.com.my/images/classified_ads/302164811838968.jpeg	tell vincent lau saw ad durianproperty get best deal le yuan residence kuchai lama condominium unit sale property info build sqft bedrooms bathrooms carparks freehold fully furnished renovated beach swimming pool view nice greenary gated guarded hours security facing south facilities nice location well maintain owner refurbished repainted owner move condition selling price rm nego le yuen residen…	tell vincent lau saw ad durianproperti get best deal le yuan resid kuchai lama condominium unit sale properti info build sqft bedroom bathroom carpark freehold fulli furnish renov beach swim pool view nice greenari gate guard hour secur face south facil nice locat well maintain owner refurbish repaint owner move condit sell price rm nego le yuen resid compris total unit divid amongst block offer …	['tell', 'vincent', 'lau', 'saw', 'ad', 'durianproperti', 'get', 'best', 'deal', 'le', 'yuan', 'resid', 'kuchai', 'lama', 'condominium', 'unit', 'sale', 'properti', 'info', 'build', 'sqft', 'bedroom', 'bathroom', 'carpark', 'freehold', 'fulli', 'furnish', 'renov', 'beach', 'swim', 'pool', 'view', 'nice', 'greenari', 'gate', 'guard', 'hour', 'secur', 'face', 'south', 'facil', 'nice', 'locat', 'wel…	1	fake	302164811838968.jpeg	302164811838968	302164811838968.jpeg	FAKE	1	302164811838968.jpeg	jpeg
331	0	335	265000	850	2	1	3	0	2	Tell Gavin Lau you saw this ad from DurianProperty to get best deal.{{{ 50 Unit Terakhir }}} Sampai Bila Korang Nak Sewa Rumah??? Ambik Peluang Ini SEKARANG Kalau Nak Miliki Rumah Sendiri! Bayaran Instalment Bulanan RM1,000 Dgn Max Tempoh Pinjaman 35 Tahun Pendapatan RM3k-RM10k (Seisi Rumah) Syarat-Syarat: *Berumur lebih dari 18 tahun *Warganegara Malaysia *Belum lagi memiliki hartanah di Selango…	Salak Perdana	Sepang	0	0	Salak Perdana, Sepang	2.84093	101.725	0	0	https://cdn.durianproperty.com.my/images/classified_ads/301651311802230.jpg	tell gavin lau saw ad durianproperty get best deal last units want rent house take opportunity want house monthly installment payment rm max loan period years income rmk rmk household conditions years old malaysian citizen yet property selangor maximum household income rm one application household individual applicants dependents apply promotional package rm house advance payment area square feet…	tell gavin lau saw ad durianproperti get best deal last unit want rent hous take opportun want hous monthli instal payment rm max loan period year incom rmk rmk household condit year old malaysian citizen yet properti selangor maximum household incom rm one applic household individu applic depend appli promot packag rm hous advanc payment area squar feet number room number bathroom park free lot …	['tell', 'gavin', 'lau', 'saw', 'ad', 'durianproperti', 'get', 'best', 'deal', 'last', 'unit', 'want', 'rent', 'hous', 'take', 'opportun', 'want', 'hous', 'monthli', 'instal', 'payment', 'rm', 'max', 'loan', 'period', 'year', 'incom', 'rmk', 'rmk', 'household', 'condit', 'year', 'old', 'malaysian', 'citizen', 'yet', 'properti', 'selangor', 'maximum', 'household', 'incom', 'rm', 'one', 'applic', '…	0	notfake	301651311802230.jpg	301651311802230	301651311802230.jpg	FAKE	1	301651311802230.jpg	jpg
448	0	452	445000	1340	2	1	3	0	2	Tell Bailey Tan you saw this ad from DurianProperty to get best deal.Semi-D Limited Unit Left From„ÄêRM425k++„Äë Bailey Tan 0123431061 Project DetailsÔºö „ÄêFREEHOLD„Äë „Äê1400-2780 „Äë „Äê2-3 Car Parks „Äë „ÄêCozy Greenery Surrounded„Äë „ÄêPure Residential„Äë „ÄêLow Density as 7-8units Per Floor„Äë „ÄêHoc20„ÄëHouse Ownership Campaign „Äê1%DownPayment„Äë „ÄêFREE„ÄëAll Legal Fees „ÄêFREE„ÄëDisburs…	BRP 4	Bukit Rahman Putra	0	0	BRP 4, Bukit Rahman Putra	3.21682	101.56	0	1	https://cdn.durianproperty.com.my/images/classified_ads/301171711768433.jpg	tell bailey tan saw ad durianproperty get best deal semi limited unit left rmk bailey tan project details freehold car parks cozy greenery surrounded pure residential low density units per floor hoc house ownership campaign downpayment free legal fees free disbursement fees free mot free quality furniture discount rebate cash back min nkve plus high way min ktm station min damansara min petaling …	tell bailey tan saw ad durianproperti get best deal semi limit unit left rmk bailey tan project detail freehold car park cozi greeneri surround pure residenti low densiti unit per floor hoc hous ownership campaign downpay free legal fee free disburs fee free mot free qualiti furnitur discount rebat cash back min nkve plu high way min ktm station min damansara min petal jaya bailey tan photo attac…	['tell', 'bailey', 'tan', 'saw', 'ad', 'durianproperti', 'get', 'best', 'deal', 'semi', 'limit', 'unit', 'left', 'rmk', 'bailey', 'tan', 'project', 'detail', 'freehold', 'car', 'park', 'cozi', 'greeneri', 'surround', 'pure', 'residenti', 'low', 'densiti', 'unit', 'per', 'floor', 'hoc', 'hous', 'ownership', 'campaign', 'downpay', 'free', 'legal', 'fee', 'free', 'disburs', 'fee', 'free', 'mot', 'fr…	1	fake	301171711768433.jpg	301171711768433	301171711768433.jpg	FAKE	1	301171711768433.jpg	jpg
488	0	494	1100000	2408	4	0	4	0	2	Tell Azizan AJ you saw this ad from DurianProperty to get best deal.Double Storey Terrace Corner Lot Elmina Green West, Jalan Casuarina Shah alam ASKING PRICE: -RM 1.1M (SPA PRICE) DETAILS: -Freehold (Open Title) -Built Up: 2,408 sqft -Land Area: 3,060.82 sqft -4 Bedroom & 4 Bathroom FACILITIES: - Playground, Landscape, Extra Land - 24hrs security with gated & guarded - jogging track AMENITIES: -…	Elmina West	Shah Alam	0	1	Elmina West, Shah Alam	3.18452	101.52	0	1	https://cdn.durianproperty.com.my/images/classified_ads/303273411918566.jpg	tell azizan aj saw ad durianproperty get best deal double storey terrace corner lot elmina green west jalan casuarina shah alam asking price rm m spa price details freehold open title built sqft land area sqft bedroom bathroom facilities playground landscape extra land hrs security gated guarded jogging track amenities saujana utama commercial masjid saujana utama she will saujana utama private s…	tell azizan aj saw ad durianproperti get best deal doubl storey terrac corner lot elmina green west jalan casuarina shah alam ask price rm m spa price detail freehold open titl built sqft land area sqft bedroom bathroom facil playground landscap extra land hr secur gate guard jog track amen saujana utama commerci masjid saujana utama she will saujana utama privat school saujana utama mall access …	['tell', 'azizan', 'aj', 'saw', 'ad', 'durianproperti', 'get', 'best', 'deal', 'doubl', 'storey', 'terrac', 'corner', 'lot', 'elmina', 'green', 'west', 'jalan', 'casuarina', 'shah', 'alam', 'ask', 'price', 'rm', 'm', 'spa', 'price', 'detail', 'freehold', 'open', 'titl', 'built', 'sqft', 'land', 'area', 'sqft', 'bedroom', 'bathroom', 'facil', 'playground', 'landscap', 'extra', 'land', 'hr', 'secur…	0	notfake	303273411918566.jpg	303273411918566	303273411918566.jpg	FAKE	1	303273411918566.jpg	jpg
529	0	535	475000	2700	3	1	3	1	2	Tell Bailey Tan you saw this ad from DurianProperty to get best deal.Kindly Call or WhatsApp Bailey Tan 012-3431061 For more Details. _______________________________________ High_End Landed Lakeside House *Photo Attachment just for Illustration Purpose* Accessibility : # 35min to Kuala Lumpur # 25min to Desa Park City # 10min to Rawang # 15min to Kepong # 30min to Petaling Jaya __________________…	Pusat Bandar Rawang	Rawang	0	7	Pusat Bandar Rawang, Rawang	3.32346	101.576	0	0	https://cdn.durianproperty.com.my/images/classified_ads/301173411768527.jpg	tell bailey tan saw ad durianproperty get best deal kindly call whatsapp bailey tan details high end landed lakeside house photo attachment illustration purpose accessibility min kuala lumpur min desa park city min rawang min kepong min petaling jaya township facilities garden boulevard commercial hub international school waterfront retail outlet village square waterfalls lookout point dventure p…	tell bailey tan saw ad durianproperti get best deal kindli call whatsapp bailey tan detail high end land lakesid hous photo attach illustr purpos access min kuala lumpur min desa park citi min rawang min kepong min petal jaya township facil garden boulevard commerci hub intern school waterfront retail outlet villag squar waterfal lookout point dventur playland camp ground wetland high end garden …	['tell', 'bailey', 'tan', 'saw', 'ad', 'durianproperti', 'get', 'best', 'deal', 'kindli', 'call', 'whatsapp', 'bailey', 'tan', 'detail', 'high', 'end', 'land', 'lakesid', 'hous', 'photo', 'attach', 'illustr', 'purpos', 'access', 'min', 'kuala', 'lumpur', 'min', 'desa', 'park', 'citi', 'min', 'rawang', 'min', 'kepong', 'min', 'petal', 'jaya', 'township', 'facil', 'garden', 'boulevard', 'commerci',…	1	fake	301173411768527.jpg	301173411768527	301173411768527.jpg	FAKE	1	301173411768527.jpg	jpg
569	0	575	399000	1841	2	0	6	0	2	Tell Eva Loo you saw this ad from DurianProperty to get best deal.‚úÖTanah Rizab Melayu Freehold ‚úÖ0% Legal Fee & Loan Stamp Duty ‚úÖPilihan unit pelbagai saiz (1/2/3/4 bilik tidur) ‚úÖKemudahan ekslusif dengan kolam renang infiniti, gimnasium dan banyak lagi - Bagi pembeli rumah Melayu yang mahukan gaya hidup bandar dengan kediaman yang moden, mewah dan inovatif, Rencana Royale oleh kumpulan CK…	Rencana	TTDI	0	0	Rencana, TTDI	3.15921	101.627	0	0	https://cdn.durianproperty.com.my/images/classified_ads/304192011980593.jpg	tell eva loo saw ad durianproperty get best deal malay reserve land freehold legal fee loan stamp duty choice units various sizes bedrooms exclusive facilities swimming pool infinity gymnasium many malay home buyers want urban lifestyle modern luxurious innovative residence rencana royale ck east group taman tun dr ismail township ttdi able meet needs built malay reserve land rencana royale plann…	tell eva loo saw ad durianproperti get best deal malay reserv land freehold legal fee loan stamp duti choic unit variou size bedroom exclus facil swim pool infin gymnasium mani malay home buyer want urban lifestyl modern luxuri innov resid rencana royal ck east group taman tun dr ismail township ttdi abl meet need built malay reserv land rencana royal plan built care accord need peopl concern thu…	['tell', 'eva', 'loo', 'saw', 'ad', 'durianproperti', 'get', 'best', 'deal', 'malay', 'reserv', 'land', 'freehold', 'legal', 'fee', 'loan', 'stamp', 'duti', 'choic', 'unit', 'variou', 'size', 'bedroom', 'exclus', 'facil', 'swim', 'pool', 'infin', 'gymnasium', 'mani', 'malay', 'home', 'buyer', 'want', 'urban', 'lifestyl', 'modern', 'luxuri', 'innov', 'resid', 'rencana', 'royal', 'ck', 'east', 'gro…	0	notfake	304192011980593.jpg	304192011980593	304192011980593.jpg	FAKE	1	304192011980593.jpg	jpg
578	0	584	352000	1000	2	0	3	0	2	Tell Ernest Chuan you saw this ad from DurianProperty to get best deal.LAST 15 UNITS Kajang New Townhouse for Sale Ideal for those looking for low density home in Kajang Site location: Jalan Kenanga, Kampung Sungai Ramal Dalam, Kajang Highlights Freehold Malay Reserved - for Semenanjung born Malays only Low density only 138 units Gated & guarded community Direct access to SILK Highway Near to Ban…	Sungai Ramal	Kajang	0	7	Sungai Ramal, Kajang	2.97583	101.756	0	0	https://cdn.durianproperty.com.my/images/classified_ads/304949412033156.png	tell ernest chuan saw ad durianproperty get best deal last units kajang new townhouse sale ideal looking low density home kajang site location jalan kenanga kampung sungai ramal dalam kajang highlights freehold malay reserved semenanjung born malays low density units gated guarded community direct access silk highway near bangi town kajang town family home sf bedrooms bathrooms balcony yard area …	tell ernest chuan saw ad durianproperti get best deal last unit kajang new townhous sale ideal look low densiti home kajang site locat jalan kenanga kampung sungai ramal dalam kajang highlight freehold malay reserv semenanjung born malay low densiti unit gate guard commun direct access silk highway near bangi town kajang town famili home sf bedroom bathroom balconi yard area carpark tandem estim …	['tell', 'ernest', 'chuan', 'saw', 'ad', 'durianproperti', 'get', 'best', 'deal', 'last', 'unit', 'kajang', 'new', 'townhous', 'sale', 'ideal', 'look', 'low', 'densiti', 'home', 'kajang', 'site', 'locat', 'jalan', 'kenanga', 'kampung', 'sungai', 'ramal', 'dalam', 'kajang', 'highlight', 'freehold', 'malay', 'reserv', 'semenanjung', 'born', 'malay', 'low', 'densiti', 'unit', 'gate', 'guard', 'commu…	0	notfake	304949412033156.png	304949412033156	304949412033156.png	FAKE	1	304949412033156.png	png
593	0	599	399000	135036	0	0	0	0	0	Tell Hafiz Halim you saw this ad from DurianProperty to get best deal.Agriculture Lans at Sg Baru Ulu Yam Batang Kali Freehold Malay Reserved 30 Pokok Durian 3.1 Acre Ada anak sungai PRICE : RM399k For more information, please whatsapp me at Hp: 0179753262 Email: se@ Hafiz Halim Sr. Real Estate Negotiator Weise International Property Consultants Sdn Bhd VE(1)0241 #listsuh WEISE INTERNATIONAL PROP…	Ulu Yam	Selangor	0	5	Ulu Yam, Selangor	3.42496	101.66	0	0	https://cdn.durianproperty.com.my/images/classified_ads/301947511823550.jpeg	tell hafiz halim saw ad durianproperty get best deal agriculture lans sg baru ulu yam batang kali freehold malay reserved pokok durian acre ada anak sungai price rmk information please whatsapp hp email se hafiz halim sr real estate negotiator weise international property consultants sdn bhd listsuh weise international property consultants sdn bhd may view ulu yam profile	tell hafiz halim saw ad durianproperti get best deal agricultur lan sg baru ulu yam batang kali freehold malay reserv pokok durian acr ada anak sungai price rmk inform pleas whatsapp hp email se hafiz halim sr real estat negoti weis intern properti consult sdn bhd listsuh weis intern properti consult sdn bhd may view ulu yam profil	['tell', 'hafiz', 'halim', 'saw', 'ad', 'durianproperti', 'get', 'best', 'deal', 'agricultur', 'lan', 'sg', 'baru', 'ulu', 'yam', 'batang', 'kali', 'freehold', 'malay', 'reserv', 'pokok', 'durian', 'acr', 'ada', 'anak', 'sungai', 'price', 'rmk', 'inform', 'pleas', 'whatsapp', 'hp', 'email', 'se', 'hafiz', 'halim', 'sr', 'real', 'estat', 'negoti', 'weis', 'intern', 'properti', 'consult', 'sdn', 'b…	0	notfake	301947511823550.jpeg	301947511823550	301947511823550.jpeg	FAKE	1	301947511823550.jpeg	jpeg
649	0	655	2800000	4077	5	2	6	1	3	Tell Wan Azemi you saw this ad from DurianProperty to get best deal.Newly Completed 3 Storey Semi-D in Ampang, Selangor * Leasehold Non Bumi * Land area 3,200 sf * Land size 40' X 80' * Built up area 4,077 sf * 6 Bedroom, 6 Bathroom * Private lift * 24 hours security, Gated and guarded community * Surrounded by lush landscape * Serene and relax surroundings with fresh air and greeneries * Exclusi…	Taman Sierra Ukay	Ampang	1	2	Taman Sierra Ukay, Ampang	3.20911	101.787	0	0	https://cdn.durianproperty.com.my/images/classified_ads/301514311793304.jpg	tell wan azemi saw ad durianproperty get best deal newly completed storey semi ampang selangor leasehold non bumi land area sf land size x built area sf bedroom bathroom private lift hours security gated guarded community surrounded lush landscape serene relax surroundings fresh air greeneries exclusive green landscape linear park water park club house swimming pool play squares sport facilities …	tell wan azemi saw ad durianproperti get best deal newli complet storey semi ampang selangor leasehold non bumi land area sf land size x built area sf bedroom bathroom privat lift hour secur gate guard commun surround lush landscap seren relax surround fresh air greeneri exclus green landscap linear park water park club hous swim pool play squar sport facil canal stream etc unit sell price rm mil…	['tell', 'wan', 'azemi', 'saw', 'ad', 'durianproperti', 'get', 'best', 'deal', 'newli', 'complet', 'storey', 'semi', 'ampang', 'selangor', 'leasehold', 'non', 'bumi', 'land', 'area', 'sf', 'land', 'size', 'x', 'built', 'area', 'sf', 'bedroom', 'bathroom', 'privat', 'lift', 'hour', 'secur', 'gate', 'guard', 'commun', 'surround', 'lush', 'landscap', 'seren', 'relax', 'surround', 'fresh', 'air', 'gr…	0	notfake	301514311793304.jpg	301514311793304	301514311793304.jpg	FAKE	1	301514311793304.jpg	jpg
754	0	761	450000	5500	4	0	4	0	2	Tell Eunice you saw this ad from DurianProperty to get best deal.Big house with Luxury Bungalow Concept !!!! Highest Rebate Ever in the marketplace 45% !!!!!!!!!!!!!! Double Storey Superlink, Semi-D & Bungalow Mix Development *Freehold *Zero% Down payment *GATED GUARDED FREE: - Free SNP Legal & Stamp Duty Fees - Free Loan Agreement & Stamp Duty Fees - Free MOT - Free Guard House Fees - Free Club …	Taman Semenyih Impian	Semenyih	0	2	Taman Semenyih Impian, Semenyih	2.9914	101.873	0	1	https://cdn.durianproperty.com.my/images/classified_ads/301618311800025.jpg	tell eunice saw ad durianproperty get best deal big house luxury bungalow concept highest rebate ever marketplace double storey superlink semi bungalow mix development freehold zero payment gated guarded free free snp legal stamp duty fees free loan agreement stamp duty fees free mot free guard house fees free club house accessibility including swimming pool fully equipped gymnasium tennis court …	tell eunic saw ad durianproperti get best deal big hous luxuri bungalow concept highest rebat ever marketplac doubl storey superlink semi bungalow mix develop freehold zero payment gate guard free free snp legal stamp duti fee free loan agreement stamp duti fee free mot free guard hous fee free club hous access includ swim pool fulli equip gymnasium tenni court badminton court confer hall spa jac…	['tell', 'eunic', 'saw', 'ad', 'durianproperti', 'get', 'best', 'deal', 'big', 'hous', 'luxuri', 'bungalow', 'concept', 'highest', 'rebat', 'ever', 'marketplac', 'doubl', 'storey', 'superlink', 'semi', 'bungalow', 'mix', 'develop', 'freehold', 'zero', 'payment', 'gate', 'guard', 'free', 'free', 'snp', 'legal', 'stamp', 'duti', 'fee', 'free', 'loan', 'agreement', 'stamp', 'duti', 'fee', 'free', 'm…	0	notfake	301618311800025.jpg	301618311800025	301618311800025.jpg	FAKE	1	301618311800025.jpg	jpg
872	0	881	248000	1000	2	0	4	1	2	Tell Ansley Mei you saw this ad from DurianProperty to get best deal.Lakeview Spanish Styled Terrace House, Batu Gajah. ~130 acre development ~Low Density within 500 units ~20 acre big lake view for leisure ~One of a kind Silverlake Village Outlets Single Storey Normal Double Storey Premier & Deluxe Land Size from 20*70 to 22*75 Min 4 Bedrooms Nearby amenities: 4 mins to KTM, KFC 8 mins to TF Val…	Bandar Tasik Idaman	Batu Gajah	5	1	Bandar Tasik Idaman, Batu Gajah	4.46677	101.05	0	0	https://cdn.durianproperty.com.my/images/classified_ads/304159511977793.jpg	tell ansley mei saw ad durianproperty get best deal lakeview spanish styled terrace house batu gajah acre development low density within units acre big lake view leisure one kind silverlake village outlets single storey normal double storey premier deluxe land size min bedrooms nearby amenities mins ktm kfc mins tf value hospital bg ets kellie castle mins golf resort mins lahat ipoh mins seri isk…	tell ansley mei saw ad durianproperti get best deal lakeview spanish style terrac hous batu gajah acr develop low densiti within unit acr big lake view leisur one kind silverlak villag outlet singl storey normal doubl storey premier delux land size min bedroom nearbi amen min ktm kfc min tf valu hospit bg et kelli castl min golf resort min lahat ipoh min seri iskandar teronoh easi access ktm ipoh…	['tell', 'ansley', 'mei', 'saw', 'ad', 'durianproperti', 'get', 'best', 'deal', 'lakeview', 'spanish', 'style', 'terrac', 'hous', 'batu', 'gajah', 'acr', 'develop', 'low', 'densiti', 'within', 'unit', 'acr', 'big', 'lake', 'view', 'leisur', 'one', 'kind', 'silverlak', 'villag', 'outlet', 'singl', 'storey', 'normal', 'doubl', 'storey', 'premier', 'delux', 'land', 'size', 'min', 'bedroom', 'nearbi'…	0	notfake	304159511977793.jpg	304159511977793	304159511977793.jpg	FAKE	1	304159511977793.jpg	jpg
887	0	896	2000000	26140	3	0	3	1	3	Tell Nelson Yap you saw this ad from DurianProperty to get best deal.Kampung Baru Subang - Agriculture zone industrial land for sale 0.6 acre (26,140 sq ft) Located at Jalan Ciku Land layout after all set back possible to build 12,000 sq ft warehouse Selling RM 2 million Please contact Nelson Yap @ 016 3328637 to arrange site viewingPlease see more of my listings at http://nelsonyap.myagent.my/.Y…	Section U9	Shah Alam	0	5	Section U9, Shah Alam	3.13834	101.519	0	0	https://cdn.durianproperty.com.my/images/classified_ads/300233011703166.jpg	tell nelson yap saw ad durianproperty get best deal kampung baru subang agriculture zone industrial land sale acre sq ft located jalan ciku land layout set back possible build sq ft warehouse selling rm million please contact nelson yap arrange site viewingplease see listings may view section you profile	tell nelson yap saw ad durianproperti get best deal kampung baru subang agricultur zone industri land sale acr sq ft locat jalan ciku land layout set back possibl build sq ft warehous sell rm million pleas contact nelson yap arrang site viewingpleas see list may view section you profil	['tell', 'nelson', 'yap', 'saw', 'ad', 'durianproperti', 'get', 'best', 'deal', 'kampung', 'baru', 'subang', 'agricultur', 'zone', 'industri', 'land', 'sale', 'acr', 'sq', 'ft', 'locat', 'jalan', 'ciku', 'land', 'layout', 'set', 'back', 'possibl', 'build', 'sq', 'ft', 'warehous', 'sell', 'rm', 'million', 'pleas', 'contact', 'nelson', 'yap', 'arrang', 'site', 'viewingpleas', 'see', 'list', 'may', …	0	notfake	300233011703166.jpg	300233011703166	300233011703166.jpg	FAKE	1	300233011703166.jpg	jpg
1023	0	1033	360000	1400	3	0	4	1	2	Tell said you saw this ad from DurianProperty to get best deal.Rumah teres setingkat dan dua tingkat untuk DIJUAL ‚Äî‚Äî‚Äî‚Äî‚Äî‚Äî‚Äî‚Äî‚Äî‚Äî‚Äî‚Äî‚Äî Persiaran Vista, Bandar Baru Salak Tinggi. Dijangka siap pada 2023. Teres setingkat -------------- Saiz. : 20x70 Built up : 900sqft 3 bilik tidur, 2 bilik air. 31 unit, berbaki 20 unit. Teres dua tingkat ---------------- Saiz. : 20x70 Built up :…	Selangor	Malaysia	0	1	Selangor, Malaysia	3.50925	101.525	0	1	https://cdn.durianproperty.com.my/images/classified_ads/303419211927414.jpg	tell said saw ad durianproperty get best deal one story two story terraced houses sale persiaran vista bandar baru salak tinggi expected completion one story terrace size x built sqft bedrooms bathrooms units units left two story terrace size x built sqft bedrooms bathrooms units units left facilities erl salak tinggi km mitsui outlet km aeon nilai km giant nilai km tesco putra nilai km nilai med…	tell said saw ad durianproperti get best deal one stori two stori terrac hous sale persiaran vista bandar baru salak tinggi expect complet one stori terrac size x built sqft bedroom bathroom unit unit left two stori terrac size x built sqft bedroom bathroom unit unit left facil erl salak tinggi km mitsui outlet km aeon nilai km giant nilai km tesco putra nilai km nilai medic center km becaus sepa…	['tell', 'said', 'saw', 'ad', 'durianproperti', 'get', 'best', 'deal', 'one', 'stori', 'two', 'stori', 'terrac', 'hous', 'sale', 'persiaran', 'vista', 'bandar', 'baru', 'salak', 'tinggi', 'expect', 'complet', 'one', 'stori', 'terrac', 'size', 'x', 'built', 'sqft', 'bedroom', 'bathroom', 'unit', 'unit', 'left', 'two', 'stori', 'terrac', 'size', 'x', 'built', 'sqft', 'bedroom', 'bathroom', 'unit', …	0	notfake	303419211927414.jpg	303419211927414	303419211927414.jpg	FAKE	1	303419211927414.jpg	jpg
1025	0	1035	320000	1010	2	2	3	1	2	Tell Kate Lim you saw this ad from DurianProperty to get best deal.New Puchong Lakeside Condominium 3 Bedroom + 2 Bathroom + Balcony + Yard + 2 car park Cheapest price to own your dream house with furnishing completed ==== NOT STUDIO, NOT RSKU, NOT RUMAHWIPS ==== < < TOP 10 Developer Saham >> - Price from RM310k size range 880sf- 1300Ssf - Estimated Monthly Installment RM1.3k Special early-bird d…	Puchong Permata 1	Puchong	0	0	Puchong Permata 1, Puchong	3.01429	101.6	0	1	https://cdn.durianproperty.com.my/images/classified_ads/304652612011905.jpg	tell kate lim saw ad durianproperty get best deal new puchong lakeside condominium bedroom bathroom balcony yard car park cheapest price dream house furnishing completed studio rsku rumahwips top developer saham price rmk size range sf ssf estimated monthly installment rm k special early bird discount promotion first buyer may view puchong permata profile	tell kate lim saw ad durianproperti get best deal new puchong lakesid condominium bedroom bathroom balconi yard car park cheapest price dream hous furnish complet studio rsku rumahwip top develop saham price rmk size rang sf ssf estim monthli instal rm k special earli bird discount promot first buyer may view puchong permata profil	['tell', 'kate', 'lim', 'saw', 'ad', 'durianproperti', 'get', 'best', 'deal', 'new', 'puchong', 'lakesid', 'condominium', 'bedroom', 'bathroom', 'balconi', 'yard', 'car', 'park', 'cheapest', 'price', 'dream', 'hous', 'furnish', 'complet', 'studio', 'rsku', 'rumahwip', 'top', 'develop', 'saham', 'price', 'rmk', 'size', 'rang', 'sf', 'ssf', 'estim', 'monthli', 'instal', 'rm', 'k', 'special', 'earli…	0	notfake	304652612011905.jpg	304652612011905	304652612011905.jpg	FAKE	1	304652612011905.jpg	jpg
1032	0	1042	390000	722	2	0	4	0	2	Tell tayjer you saw this ad from DurianProperty to get best deal.New Freehold Residences in Between Mont Kiara & KL Metropolis ! [500m to MITEC MATRADE] IDEAL LAYOUT FOR OWNSTAY & INVESTMENT (2-4BEDROOMS/Dual Key unit Available) Tired of looking for affordable housing price in KL prime area ! This is it, this is YOUR GOLDEN OPPORTUNITY ! --STARTING FROM 400K+-- -All 1st home buyers are welcome wi…	Kepong 5 North Kiara	Kuala Lumpur	1	0	Kepong 5 North Kiara, Kuala Lumpur	3.19059	101.653	0	0	https://cdn.durianproperty.com.my/images/classified_ads/300589211728222.jpg	tell tayjer saw ad durianproperty get best deal new freehold residences mont kiara kl metropolis m mitec matrade ideal layout ownstay investment bedrooms dual key unit available tired looking affordable housing price kl prime area golden opportunity starting k st home buyers welcome exclusive rebates hoc free legal fees units come min carparks walking distance ktm mrt stations mins mont kiara hig…	tell tayjer saw ad durianproperti get best deal new freehold resid mont kiara kl metropoli m mitec matrad ideal layout ownstay invest bedroom dual key unit avail tire look afford hous price kl prime area golden opportun start k st home buyer welcom exclus rebat hoc free legal fee unit come min carpark walk distanc ktm mrt station min mont kiara high end residenti mint publika acr land freehold hi…	['tell', 'tayjer', 'saw', 'ad', 'durianproperti', 'get', 'best', 'deal', 'new', 'freehold', 'resid', 'mont', 'kiara', 'kl', 'metropoli', 'm', 'mitec', 'matrad', 'ideal', 'layout', 'ownstay', 'invest', 'bedroom', 'dual', 'key', 'unit', 'avail', 'tire', 'look', 'afford', 'hous', 'price', 'kl', 'prime', 'area', 'golden', 'opportun', 'start', 'k', 'st', 'home', 'buyer', 'welcom', 'exclus', 'rebat', '…	0	notfake	300589211728222.jpg	300589211728222	300589211728222.jpg	FAKE	1	300589211728222.jpg	jpg
1146	0	1156	250000	860	2	0	3	1	1	Tell A Abang Zuhaili you saw this ad from DurianProperty to get best deal.RESIDENSI LARKIN INDAH, JOHOR BAHRU, JOHOR Kediaman yang terletak di kawasan yang strategik, kondusif dan berkualiti DETAILS: Project Name: Residensi Larkin Indah Project Type: Apartment Developer: PR1MA CORPORATION MALAYSIA Tenure: Leasehold 99 Yrs (2109) Price: RM246,368 - RM310,322 Completion Year: 2023 FACILITIES: - Mul…	Larkin Indah	Johor Bahru	2	0	Larkin Indah, Johor Bahru	1.49615	103.738	0	0	https://cdn.durianproperty.com.my/images/classified_ads/305026412038538.png	tell abang zuhaili saw ad durianproperty get best deal residensi larkin indah johor bahru johor kediaman yang terletak di kawasan yang strategik kondusif dan berkualiti details project name residensi larkin indah project type apartment developer prma corporation malaysia tenure leasehold yrs price rm rm completion year facilities multipurpose hall surau kindergarten nursery management office tari…	tell abang zuhaili saw ad durianproperti get best deal residensi larkin indah johor bahru johor kediaman yang terletak di kawasan yang strategik kondusif dan berkual detail project name residensi larkin indah project type apart develop prma corpor malaysia tenur leasehold yr price rm rm complet year facil multipurpos hall surau kindergarten nurseri manag offic tarikan menarik kpj puteri specialis…	['tell', 'abang', 'zuhaili', 'saw', 'ad', 'durianproperti', 'get', 'best', 'deal', 'residensi', 'larkin', 'indah', 'johor', 'bahru', 'johor', 'kediaman', 'yang', 'terletak', 'di', 'kawasan', 'yang', 'strategik', 'kondusif', 'dan', 'berkual', 'detail', 'project', 'name', 'residensi', 'larkin', 'indah', 'project', 'type', 'apart', 'develop', 'prma', 'corpor', 'malaysia', 'tenur', 'leasehold', 'yr',…	0	notfake	305026412038538.png	305026412038538	305026412038538.png	FAKE	1	305026412038538.png	png
1160	0	1171	245000	850	2	0	3	1	1	Tell A Abang Zuhaili you saw this ad from DurianProperty to get best deal.RESIDENSI KUBANG KERIAN, KOTA BAHRU, KELANTAN * Leasehold 99 years (Malay Reserved) * Wajib IC Kelantan atau Permastautin lebih 10 tahun di Kelantan * 632 units * Menawarkan sebuah kediaman berkomuniti berkonsepkan Taman Dalam Bandar yang eksklusif - Booking serendah RM500 sahaja - Lokasi Sangat Strategik, berdekatan HUSM, …	Kubang Kerian	Kota Bharu	12	0	Kubang Kerian, Kota Bharu	6.08697	102.276	0	0	https://cdn.durianproperty.com.my/images/classified_ads/305106712044923.jpg	tell abang zuhaili saw ad durianproperty get best deal kubang kerian residence kota bahru kelantan leasehold years malay reserved must ic kelantan resident years kelantan units offering community residence exclusive city park concept booking low rm strategic location near husm kubang kerian price starting rmk subject availability large development area acres land attractive development riverside …	tell abang zuhaili saw ad durianproperti get best deal kubang kerian resid kota bahru kelantan leasehold year malay reserv must ic kelantan resid year kelantan unit offer commun resid exclus citi park concept book low rm strateg locat near husm kubang kerian price start rmk subject avail larg develop area acr land attract develop riversid fenc area guard type unit differ size sqft sqft sqft among…	['tell', 'abang', 'zuhaili', 'saw', 'ad', 'durianproperti', 'get', 'best', 'deal', 'kubang', 'kerian', 'resid', 'kota', 'bahru', 'kelantan', 'leasehold', 'year', 'malay', 'reserv', 'must', 'ic', 'kelantan', 'resid', 'year', 'kelantan', 'unit', 'offer', 'commun', 'resid', 'exclus', 'citi', 'park', 'concept', 'book', 'low', 'rm', 'strateg', 'locat', 'near', 'husm', 'kubang', 'kerian', 'price', 'sta…	0	notfake	305106712044923.jpg	305106712044923	305106712044923.jpg	FAKE	1	305106712044923.jpg	jpg
1233	0	1244	370000	949	2	1	3	1	1	Tell Mohamad Ikhwan bin Mohamad Ibrahim you saw this ad from DurianProperty to get best deal.CONDO RESIDENSI LAGUNA, BANDAR SUNWAY FACING POOL ASKING PRICE RM370K[Nego] Mv Rm400k DETAILS * Type Condominium * 3 bed 2 bath * Leasehold [Non Bumi] * Size 949 sqft * Level 3 * Maintenance : RM 240 * 1 Covered car par * Renovated with kitchen Cabinet and Air conditioner FACILITIES * 24H security * Gymna…	Selangor	Malaysia	0	0	Selangor, Malaysia	3.50925	101.525	2	0	https://cdn.durianproperty.com.my/images/classified_ads/304001411966560.jpg	tell mohamad ikhwan bin mohamad ibrahim saw ad durianproperty get best deal condo residensi laguna bandar sunway facing pool asking price rmk nego mv rmk details type condominium bed bath leasehold non bumi size sqft level maintenance rm covered car par renovated kitchen cabinet air conditioner facilities h security gymnasium swimming pool surau cafe laundry multipurpose hall amenities sunway geo…	tell mohamad ikhwan bin mohamad ibrahim saw ad durianproperti get best deal condo residensi laguna bandar sunway face pool ask price rmk nego mv rmk detail type condominium bed bath leasehold non bumi size sqft level mainten rm cover car par renov kitchen cabinet air condition facil h secur gymnasium swim pool surau cafe laundri multipurpos hall amen sunway geo avenu sunway medic centr sunway pyr…	['tell', 'mohamad', 'ikhwan', 'bin', 'mohamad', 'ibrahim', 'saw', 'ad', 'durianproperti', 'get', 'best', 'deal', 'condo', 'residensi', 'laguna', 'bandar', 'sunway', 'face', 'pool', 'ask', 'price', 'rmk', 'nego', 'mv', 'rmk', 'detail', 'type', 'condominium', 'bed', 'bath', 'leasehold', 'non', 'bumi', 'size', 'sqft', 'level', 'mainten', 'rm', 'cover', 'car', 'par', 'renov', 'kitchen', 'cabinet', 'a…	0	notfake	304001411966560.jpg	304001411966560	304001411966560.jpg	FAKE	1	304001411966560.jpg	jpg
1247	0	1258	118000	750	2	0	3	1	1	Tell Steven Yuen you saw this ad from DurianProperty to get best deal.STEVEN 018-232 2129 STEVEN 018-232 2129 STEVEN 018-232 2129 >Well kept >Below market price >High rental return >Near amenities area >Easy access *** This property is arguably one of the best in its range a MUST view *** * Good Property for Own Stay / Investment . * easy access near to town . * Photo is just for a DISPLAY to pro…	Idaman Apartment	Damansara Damai	0	0	Idaman Apartment, Damansara Damai	3.19024	101.592	0	0	https://cdn.durianproperty.com.my/images/classified_ads/303699011945387.jpg	tell steven yuen saw ad durianproperty get best deal steven steven steven well kept market price high rental return near amenities area easy access property arguably one best range must view good property stay investment easy access near town photo display protect owner tenant privacy pictures shown might actual unit illustration purpose appreciate view appointment personalized presentation pleas…	tell steven yuen saw ad durianproperti get best deal steven steven steven well kept market price high rental return near amen area easi access properti arguabl one best rang must view good properti stay invest easi access near town photo display protect owner tenant privaci pictur shown might actual unit illustr purpos appreci view appoint person present pleas contact would pleasur serv pleas cal…	['tell', 'steven', 'yuen', 'saw', 'ad', 'durianproperti', 'get', 'best', 'deal', 'steven', 'steven', 'steven', 'well', 'kept', 'market', 'price', 'high', 'rental', 'return', 'near', 'amen', 'area', 'easi', 'access', 'properti', 'arguabl', 'one', 'best', 'rang', 'must', 'view', 'good', 'properti', 'stay', 'invest', 'easi', 'access', 'near', 'town', 'photo', 'display', 'protect', 'owner', 'tenant',…	1	fake	303699011945387.jpg	303699011945387	303699011945387.jpg	FAKE	1	303699011945387.jpg	jpg
1302	0	1313	470000	1033	2	1	3	1	2	Tell Billy Chan you saw this ad from DurianProperty to get best deal.##NEWLY LAUNCHED PROJECT ~Short distance to Midvalley, Bandar Malaysia ~Surrounded by schools, ideal for family with kids Price: Starting RM470k ~Size :1033 sq ft ~2 Parking Lots ~3 Rooms 2 Bathrooms ~24 hour security & guarded & Gated ~Good location for own stay or investment FACILITIES ~Swimming Pool ~Gym ~Playgrounds ~Praying…	Old Klang Road	Kuala Lumpur	1	0	Old Klang Road, Kuala Lumpur	3.10887	101.678	0	0	https://cdn.durianproperty.com.my/images/classified_ads/304054411969480.jpg	tell billy chan saw ad durianproperty get best deal newly launched project short distance midvalley bandar malaysia surrounded schools ideal family kids price starting rmk size sq ft parking lots rooms bathrooms hour security guarded gated good location stay investment facilities swimming pool gym playgrounds praying room hurry limited units available please contact billy information may view old…	tell billi chan saw ad durianproperti get best deal newli launch project short distanc midvalley bandar malaysia surround school ideal famili kid price start rmk size sq ft park lot room bathroom hour secur guard gate good locat stay invest facil swim pool gym playground pray room hurri limit unit avail pleas contact billi inform may view old klang road profil	['tell', 'billi', 'chan', 'saw', 'ad', 'durianproperti', 'get', 'best', 'deal', 'newli', 'launch', 'project', 'short', 'distanc', 'midvalley', 'bandar', 'malaysia', 'surround', 'school', 'ideal', 'famili', 'kid', 'price', 'start', 'rmk', 'size', 'sq', 'ft', 'park', 'lot', 'room', 'bathroom', 'hour', 'secur', 'guard', 'gate', 'good', 'locat', 'stay', 'invest', 'facil', 'swim', 'pool', 'gym', 'play…	0	notfake	304054411969480.jpg	304054411969480	304054411969480.jpg	FAKE	1	304054411969480.jpg	jpg
1340	0	1351	610000	1350	3	1	4	0	2	Tell Billy Chan you saw this ad from DurianProperty to get best deal.##NEWLY LAUNCHED PROJECT ~ Located at the centre of Puchong hub ~ Surrounded by commercial area ~ Walking distance to medical centre, eateries, banks, etc ~ Easy access to highway ~ Very low density ~ Freehold ~ Big balcony ~ 2 to 4 rooms ~ 2 parking lots ~ Early bird promotion on-going ~ Cheap booking fees ~ HOC package HURRY U…	Pavilion	Bandar Puteri Puchong	0	0	Pavilion, Bandar Puteri Puchong	3.02267	101.625	0	0	https://cdn.durianproperty.com.my/images/classified_ads/304060111969914.jpg	tell billy chan saw ad durianproperty get best deal newly launched project located centre puchong hub surrounded commercial area walking distance medical centre eateries banks etc easy access highway low density freehold big balcony rooms parking lots early bird promotion going cheap booking fees hoc package hurry limited units available please contact billy information viewing may view pavilion …	tell billi chan saw ad durianproperti get best deal newli launch project locat centr puchong hub surround commerci area walk distanc medic centr eateri bank etc easi access highway low densiti freehold big balconi room park lot earli bird promot go cheap book fee hoc packag hurri limit unit avail pleas contact billi inform view may view pavilion profil	['tell', 'billi', 'chan', 'saw', 'ad', 'durianproperti', 'get', 'best', 'deal', 'newli', 'launch', 'project', 'locat', 'centr', 'puchong', 'hub', 'surround', 'commerci', 'area', 'walk', 'distanc', 'medic', 'centr', 'eateri', 'bank', 'etc', 'easi', 'access', 'highway', 'low', 'densiti', 'freehold', 'big', 'balconi', 'room', 'park', 'lot', 'earli', 'bird', 'promot', 'go', 'cheap', 'book', 'fee', 'h…	0	notfake	304060111969914.jpg	304060111969914	304060111969914.jpg	FAKE	1	304060111969914.jpg	jpg
1423	0	1434	138000000	40075200	0	0	0	1	0	Tell sc sam you saw this ad from DurianProperty to get best deal.*Near to Cameron Highlands . *29km from tanah Rata, Cameron Highlands *250km from Kuala Lumpur. *Border of Pahang, Kelantan, Perak. *Highlands more than 1000 metre above sea level. *leasehold until 2098 *Suitable for integrated nature base tourism development.You may view Kelantan Profile here.	Kelantan	Malaysia	12	5	Kelantan, Malaysia	5.11515	101.889	0	0	https://cdn.durianproperty.com.my/images/classified_ads/300194611700802.PNG	tell sc sam saw ad durianproperty get best deal near cameron highlands km tanah rata cameron highlands km kuala lumpur border pahang kelantan perak highlands metre sea level leasehold suitable integrated nature base tourism development may view kelantan profile	tell sc sam saw ad durianproperti get best deal near cameron highland km tanah rata cameron highland km kuala lumpur border pahang kelantan perak highland metr sea level leasehold suitabl integr natur base tourism develop may view kelantan profil	['tell', 'sc', 'sam', 'saw', 'ad', 'durianproperti', 'get', 'best', 'deal', 'near', 'cameron', 'highland', 'km', 'tanah', 'rata', 'cameron', 'highland', 'km', 'kuala', 'lumpur', 'border', 'pahang', 'kelantan', 'perak', 'highland', 'metr', 'sea', 'level', 'leasehold', 'suitabl', 'integr', 'natur', 'base', 'tourism', 'develop', 'may', 'view', 'kelantan', 'profil']	0	notfake	300194611700802.PNG	300194611700802	300194611700802.PNG	FAKE	1	300194611700802.PNG	PNG
1441	0	1453	1300000	3216	5	0	5	1	3	Tell James TanCP you saw this ad from DurianProperty to get best deal.********** 3STOREY END LOT LAKEFIELD - REED SUNGAI BESI KL ********** ********** 3STOREY END LOT LAKEFIELD - REED SUNGAI BESI KL ********** ********** 3STOREY END LOT LAKEFIELD - REED SUNGAI BESI KL ********** „Äê DROP : RM 150K „Äë „Äê MARKET VALUE : RM 1.45M „Äë =================================== Now Asking : RM 1.3M =======…	Reed	Lake Fields	0	1	Reed, Lake Fields	3.05985	101.715	0	0	https://cdn.durianproperty.com.my/images/classified_ads/304856112026712.jpeg	tell james tancp saw ad durianproperty get best deal storey end lot lakefield reed sungai besi kl storey end lot lakefield reed sungai besi kl storey end lot lakefield reed sungai besi kl drop rm k market value rm m asking rm m please contact property details leasehold la sqf bu sqf r b tenanted end lot limited unit others remark downpayment needed banker provided pre check loan eligibility advan…	tell jame tancp saw ad durianproperti get best deal storey end lot lakefield reed sungai besi kl storey end lot lakefield reed sungai besi kl storey end lot lakefield reed sungai besi kl drop rm k market valu rm m ask rm m pleas contact properti detail leasehold la sqf bu sqf r b tenant end lot limit unit other remark downpay need banker provid pre check loan elig advanc vip group market properti…	['tell', 'jame', 'tancp', 'saw', 'ad', 'durianproperti', 'get', 'best', 'deal', 'storey', 'end', 'lot', 'lakefield', 'reed', 'sungai', 'besi', 'kl', 'storey', 'end', 'lot', 'lakefield', 'reed', 'sungai', 'besi', 'kl', 'storey', 'end', 'lot', 'lakefield', 'reed', 'sungai', 'besi', 'kl', 'drop', 'rm', 'k', 'market', 'valu', 'rm', 'm', 'ask', 'rm', 'm', 'pleas', 'contact', 'properti', 'detail', 'lea…	1	fake	304856112026712.jpeg	304856112026712	304856112026712.jpeg	FAKE	1	304856112026712.jpeg	jpeg
1472	0	1485	82328400	1829520	3	0	3	0	3	Tell Zureeproperties you saw this ad from DurianProperty to get best deal.Development Land at Salak Tinggi, Dengkil, Sepang for SALE Details:- - 42 Acre / 1,829,520 sq. ft. - freehold - for houses and business building Amenities:- - Kolej Teknologi Timur (KTT) - SK Taman Seroja - SMK Bandar Baru Salak Tinggi - SMA Bandar Baru Salak Tinggi - SMK Seri Sepang - Pejabat Pos Bandar Baru Salak Tinggi -…	Bandar Baru Salak Tinggi	Sepang	0	5	Bandar Baru Salak Tinggi, Sepang	2.81366	101.731	0	0	https://cdn.durianproperty.com.my/images/classified_ads/300995911755709.png	tell zureeproperties saw ad durianproperty get best deal development land salak tinggi dengkil sepang sale details acre sq ft freehold houses business building amenities kolej teknologi timur ktt sk taman seroja smk bandar baru salak tinggi sma bandar baru salak tinggi smk seri sepang pejabat pos bandar baru salak tinggi pejabat tanah sepang stadium bandar baru salak tinggi unikl miat accesibilit…	tell zureeproperti saw ad durianproperti get best deal develop land salak tinggi dengkil sepang sale detail acr sq ft freehold hous busi build amen kolej teknolog timur ktt sk taman seroja smk bandar baru salak tinggi sma bandar baru salak tinggi smk seri sepang pejabat po bandar baru salak tinggi pejabat tanah sepang stadium bandar baru salak tinggi unikl miat acces elit highway salak tinggi erl…	['tell', 'zureeproperti', 'saw', 'ad', 'durianproperti', 'get', 'best', 'deal', 'develop', 'land', 'salak', 'tinggi', 'dengkil', 'sepang', 'sale', 'detail', 'acr', 'sq', 'ft', 'freehold', 'hous', 'busi', 'build', 'amen', 'kolej', 'teknolog', 'timur', 'ktt', 'sk', 'taman', 'seroja', 'smk', 'bandar', 'baru', 'salak', 'tinggi', 'sma', 'bandar', 'baru', 'salak', 'tinggi', 'smk', 'seri', 'sepang', 'pe…	0	notfake	300995911755709.png	300995911755709	300995911755709.png	FAKE	1	300995911755709.png	png
1478	0	1491	650000	1000	2	1	3	1	2	Tell Felicia you saw this ad from DurianProperty to get best deal.[GRAND CONDO @ KL] SELLING FAST WITH LOWER THAN MARKET VALUE FOR YOU !! ================= Felicia 016-5549572 Felicia 016-5549572 Felicia 016-5549572 ================= *** FREE ALL LOAN & LEGAL FEES *** FREE ALL FIXED FURNITURES *** FREE 2 COVERED PARKING LOTS *** RM650 PER ONLY *** 1 MIN TO DUKE & SPRINT HIGHWAYS *** 5 MIN TO ALL …	Bangsar Baru	Bangsar	1	0	Bangsar Baru, Bangsar	3.1329	101.671	0	1	https://cdn.durianproperty.com.my/images/classified_ads/305021912037985.jpg	tell felicia saw ad durianproperty get best deal grand condo kl selling fast lower market value felicia felicia felicia free loan legal fees free fixed furnitures free covered parking lots rm per min duke sprint highways min education hub ideal investment staying location low density tier security strategic location least major access huge common facilities area rejuvenate liftstyle free private …	tell felicia saw ad durianproperti get best deal grand condo kl sell fast lower market valu felicia felicia felicia free loan legal fee free fix furnitur free cover park lot rm per min duke sprint highway min educ hub ideal invest stay locat low densiti tier secur strateg locat least major access huge common facil area rejuven liftstyl free privat feeder bu servic kl citi center near klcc pavilli…	['tell', 'felicia', 'saw', 'ad', 'durianproperti', 'get', 'best', 'deal', 'grand', 'condo', 'kl', 'sell', 'fast', 'lower', 'market', 'valu', 'felicia', 'felicia', 'felicia', 'free', 'loan', 'legal', 'fee', 'free', 'fix', 'furnitur', 'free', 'cover', 'park', 'lot', 'rm', 'per', 'min', 'duke', 'sprint', 'highway', 'min', 'educ', 'hub', 'ideal', 'invest', 'stay', 'locat', 'low', 'densiti', 'tier', '…	0	notfake	305021912037985.jpg	305021912037985	305021912037985.jpg	FAKE	1	305021912037985.jpg	jpg
1511	0	1526	275000	830	2	0	3	0	2	Tell Anas Adib you saw this ad from DurianProperty to get best deal.SERI INTAN APARTMENT, SETIA ALAM Price: RM275,000 -Freehold -Block 3 -Size 830 sf -Middle Floor -3 rooms 2 bath -Basic unit -Facing Playground/Futsal Court ***Tenant move out End of January. -2 Private Parking -Maintenance fees: RM130 Location: Setia Alam, 40170 Shah Alam, Selangor For details, kindly call/WhatsApp : Anas : 60192…	Seri Intan Apartment @ Setia Alam	Setia Alam	0	0	Seri Intan Apartment @ Setia Alam, Setia Alam	3.13166	101.471	1	0	https://cdn.durianproperty.com.my/images/classified_ads/302116511835349.JPG	tell anas adib saw ad durianproperty get best deal seri intan apartment setia alam price rm freehold block size sf middle floor rooms bath basic unit facing playground futsal court tenant move end january private parking maintenance fees rm location setia alam shah alam selangor details kindly call whatsapp anas weise property doubleaproject weise international property consultants sdn bhd may vi…	tell ana adib saw ad durianproperti get best deal seri intan apart setia alam price rm freehold block size sf middl floor room bath basic unit face playground futsal court tenant move end januari privat park mainten fee rm locat setia alam shah alam selangor detail kindli call whatsapp ana weis properti doubleaproject weis intern properti consult sdn bhd may view seri intan apart setia alam profil	['tell', 'ana', 'adib', 'saw', 'ad', 'durianproperti', 'get', 'best', 'deal', 'seri', 'intan', 'apart', 'setia', 'alam', 'price', 'rm', 'freehold', 'block', 'size', 'sf', 'middl', 'floor', 'room', 'bath', 'basic', 'unit', 'face', 'playground', 'futsal', 'court', 'tenant', 'move', 'end', 'januari', 'privat', 'park', 'mainten', 'fee', 'rm', 'locat', 'setia', 'alam', 'shah', 'alam', 'selangor', 'det…	0	notfake	302116511835349.JPG	302116511835349	302116511835349.JPG	FAKE	1	302116511835349.JPG	JPG
1555	0	1570	104400	538	2	0	2	0	1	Tell JC Auction Insight you saw this ad from DurianProperty to get best deal.Akasia Apartment, Mutiara Perdana 1, Bayan Lepas, Penang (Below Market RM 40,600) Get immediate 28% discount! Now Selling at RM 104,400 ONLY!! Marketing selling RM 145,000 ***Closing date for free registration on 18 Oct 2021 Tenure : FREEHOLD Title : Residential Land Size: 538 2 Bedroom 2 Bathroom 2 Car Park Rental Yield…	Apartment Akasia	Bayan Lepas	4	0	Apartment Akasia, Bayan Lepas	5.30209	100.257	0	0	https://cdn.durianproperty.com.my/images/classified_ads/305103212044612.JPG	tell jc auction insight saw ad durianproperty get best deal akasia apartment mutiara perdana bayan lepas penang market rm get immediate discount selling rm marketing selling rm closing date free registration oct tenure freehold title residential land size bedroom bathroom car park rental yield per annum located mins f b stall surau al mubarak mins kompleks tabung haji macdonald setia triangle min…	tell jc auction insight saw ad durianproperti get best deal akasia apart mutiara perdana bayan lepa penang market rm get immedi discount sell rm market sell rm close date free registr oct tenur freehold titl residenti land size bedroom bathroom car park rental yield per annum locat min f b stall surau al mubarak min komplek tabung haji macdonald setia triangl min penang intern airport address x b…	['tell', 'jc', 'auction', 'insight', 'saw', 'ad', 'durianproperti', 'get', 'best', 'deal', 'akasia', 'apart', 'mutiara', 'perdana', 'bayan', 'lepa', 'penang', 'market', 'rm', 'get', 'immedi', 'discount', 'sell', 'rm', 'market', 'sell', 'rm', 'close', 'date', 'free', 'registr', 'oct', 'tenur', 'freehold', 'titl', 'residenti', 'land', 'size', 'bedroom', 'bathroom', 'car', 'park', 'rental', 'yield',…	0	notfake	305103212044612.JPG	305103212044612	305103212044612.JPG	FAKE	1	305103212044612.JPG	JPG
1560	0	1575	700000	1100	2	1	3	0	2	Tell Angel fong you saw this ad from DurianProperty to get best deal.Freehold Purely Residential Condo at KL City Branded Top 3 developer Nearby MRT Station, Free shuttle bus to KL Sentral, KLCC, MRT Strategically located, access to practically every hotspot in town is effortlessly easy. Enjoy [Privacy , Convenient, Comfortable] to fullest at KL city. Location:k/nnf1iw Promotion Package: 0% Entry…	Desa ParkCity	Kepong	0	0	Desa ParkCity, Kepong	3.18624	101.63	0	0	https://cdn.durianproperty.com.my/images/classified_ads/302497811865138.jpg	tell angel fong saw ad durianproperty get best deal freehold purely residential condo kl city branded top developer nearby mrt station free shuttle bus kl sentral klcc mrt strategically located access practically every hotspot town effortlessly easy enjoy privacy convenient comfortable fullest kl city location k nnfiw promotion package entry cost loan cash back rebate hoc free legal stamping mot …	tell angel fong saw ad durianproperti get best deal freehold pure residenti condo kl citi brand top develop nearbi mrt station free shuttl bu kl sentral klcc mrt strateg locat access practic everi hotspot town effortlessli easi enjoy privaci conveni comfort fullest kl citi locat k nnfiw promot packag entri cost loan cash back rebat hoc free legal stamp mot fee free car park per unit project detai…	['tell', 'angel', 'fong', 'saw', 'ad', 'durianproperti', 'get', 'best', 'deal', 'freehold', 'pure', 'residenti', 'condo', 'kl', 'citi', 'brand', 'top', 'develop', 'nearbi', 'mrt', 'station', 'free', 'shuttl', 'bu', 'kl', 'sentral', 'klcc', 'mrt', 'strateg', 'locat', 'access', 'practic', 'everi', 'hotspot', 'town', 'effortlessli', 'easi', 'enjoy', 'privaci', 'conveni', 'comfort', 'fullest', 'kl', …	0	notfake	302497811865138.jpg	302497811865138	302497811865138.jpg	FAKE	1	302497811865138.jpg	jpg
1602	0	1617	320000	538	1	0	1	0	1	Tell Annzurin you saw this ad from DurianProperty to get best deal.New Service Apartment @ Presint 5 Putrajaya ‚òòÔ∏è‚òòÔ∏è‚òòÔ∏è *Green Living Environment Concept* ‚òòÔ∏è‚òòÔ∏è‚òòÔ∏è =================== ‚ñ™Ô∏èFreehold ‚ñ™Ô∏èLow Booking Fee RM1,000 only You may view Presint 5 Profile here.	Presint 5	Putrajaya	0	0	Presint 5, Putrajaya	2.89473	101.677	0	0	https://cdn.durianproperty.com.my/images/classified_ads/300014511689407.jpg	tell annzurin saw ad durianproperty get best deal new service apartment presint putrajaya green living environment concept freehold low booking fee rm may view presint profile	tell annzurin saw ad durianproperti get best deal new servic apart presint putrajaya green live environ concept freehold low book fee rm may view presint profil	['tell', 'annzurin', 'saw', 'ad', 'durianproperti', 'get', 'best', 'deal', 'new', 'servic', 'apart', 'presint', 'putrajaya', 'green', 'live', 'environ', 'concept', 'freehold', 'low', 'book', 'fee', 'rm', 'may', 'view', 'presint', 'profil']	0	notfake	300014511689407.jpg	300014511689407	300014511689407.jpg	FAKE	1	300014511689407.jpg	jpg
1607	0	1622	450000	320	1	2	1	0	3	Tell Alvin Lau you saw this ad from DurianProperty to get best deal.Genting Hill Top Best Investment Property Near To Sky World Theme Park Just ONE and ONLY project in Genting Hilltop For Investment Purpose !!! Monthly return can get at least RM3,000 and above ! Ready Tenant And Branded Hotel Management to manage it Fully Furnished Hassle Free! 5 Star Hotel Concept ( Pictures shown might not from…	Grand Ion Majestic	Genting Highlands	8	0	Grand Ion Majestic, Genting Highlands	3.43158	101.79	1	0	https://cdn.durianproperty.com.my/images/classified_ads/304397011996586.jpg	tell alvin lau saw ad durianproperty get best deal genting hill top best investment property near sky world theme park one project genting hilltop investment purpose monthly return get least rm ready tenant branded hotel management manage fully furnished hassle free star hotel concept pictures shown might actual unit illustration purpose appreciate view appointment personalized presentation pleas…	tell alvin lau saw ad durianproperti get best deal gent hill top best invest properti near sky world theme park one project gent hilltop invest purpos monthli return get least rm readi tenant brand hotel manag manag fulli furnish hassl free star hotel concept pictur shown might actual unit illustr purpos appreci view appoint person present pleas contact would pleasur serv pleas call sm whatsapp a…	['tell', 'alvin', 'lau', 'saw', 'ad', 'durianproperti', 'get', 'best', 'deal', 'gent', 'hill', 'top', 'best', 'invest', 'properti', 'near', 'sky', 'world', 'theme', 'park', 'one', 'project', 'gent', 'hilltop', 'invest', 'purpos', 'monthli', 'return', 'get', 'least', 'rm', 'readi', 'tenant', 'brand', 'hotel', 'manag', 'manag', 'fulli', 'furnish', 'hassl', 'free', 'star', 'hotel', 'concept', 'pictu…	1	fake	304397011996586.jpg	304397011996586	304397011996586.jpg	FAKE	1	304397011996586.jpg	jpg
1625	0	1640	9000000	39910	3	0	3	0	3	Tell Thean you saw this ad from DurianProperty to get best deal.Location : Nilai Industrial Estate, Negeri Sembilan Building Type : Single Storey Factory With 2 storey office & Mezzanine Store, Land Area : 49,212sft Built up : Office : 3,094sft x 2 = 6,184sft Factory : 21,286sft Mezzanine : 3,880sft Side Extension : 8,560sft TOTAL : 39,910sft Tenure : Freehold Eaves Height : Approx 25ft Electrici…	Nilai Industrial Estate	Nilai	3	4	Nilai Industrial Estate, Nilai	2.80246	101.799	1	0	https://cdn.durianproperty.com.my/images/classified_ads/291971911171000.png	tell thean saw ad durianproperty get best deal location nilai industrial estate negeri sembilan building type single storey factory storey office mezzanine store land area sft built office sft x sft factory sft mezzanine sft side extension sft total sft tenure freehold eaves height approx ft electricity supply p v amps x vacant possession upon completion sale remarks main road frontage located pr…	tell thean saw ad durianproperti get best deal locat nilai industri estat negeri sembilan build type singl storey factori storey offic mezzanin store land area sft built offic sft x sft factori sft mezzanin sft side extens sft total sft tenur freehold eav height approx ft electr suppli p v amp x vacant possess upon complet sale remark main road frontag locat proper industri estat easi access high…	['tell', 'thean', 'saw', 'ad', 'durianproperti', 'get', 'best', 'deal', 'locat', 'nilai', 'industri', 'estat', 'negeri', 'sembilan', 'build', 'type', 'singl', 'storey', 'factori', 'storey', 'offic', 'mezzanin', 'store', 'land', 'area', 'sft', 'built', 'offic', 'sft', 'x', 'sft', 'factori', 'sft', 'mezzanin', 'sft', 'side', 'extens', 'sft', 'total', 'sft', 'tenur', 'freehold', 'eav', 'height', 'ap…	0	notfake	291971911171000.png	291971911171000	291971911171000.png	FAKE	1	291971911171000.png	png
1628	0	1643	315000	935	2	0	3	1	1	Tell Wayne Lee you saw this ad from DurianProperty to get best deal.PR1MA Alam Damai HOC Package: Better Offer, Free SPA Fee, Free MOT & Free Stamping Property Details : - 935sf - 3 Bedroom, 2 Bathroom - Nice View - 1 Covered Car Park - Move In Condition - Sale: RM315k ++ - Rental : RM 1,000 ++ Accessibility: - Convenient access to Connaught, Taman Len Sen, Tun Hussien Onn, Balakong, Seri Kembang…	Residensi PR1MA Alam Damai	Alam Damai	0	0	Residensi PR1MA Alam Damai, Alam Damai	3.05669	101.742	0	0	https://cdn.durianproperty.com.my/images/classified_ads/304105311973119.jpg	tell wayne lee saw ad durianproperty get best deal prma alam damai hoc package better offer free spa fee free mot free stamping property details sf bedroom bathroom nice view covered car park move condition sale rmk rental rm accessibility convenient access connaught taman len sen tun hussien onn balakong seri kembangan near usci university convenient access cheras kajang highway convenient acces…	tell wayn lee saw ad durianproperti get best deal prma alam damai hoc packag better offer free spa fee free mot free stamp properti detail sf bedroom bathroom nice view cover car park move condit sale rmk rental rm access conveni access connaught taman len sen tun hussien onn balakong seri kembangan near usci univers conveni access chera kajang highway conveni access mrr suke highway facil commun…	['tell', 'wayn', 'lee', 'saw', 'ad', 'durianproperti', 'get', 'best', 'deal', 'prma', 'alam', 'damai', 'hoc', 'packag', 'better', 'offer', 'free', 'spa', 'fee', 'free', 'mot', 'free', 'stamp', 'properti', 'detail', 'sf', 'bedroom', 'bathroom', 'nice', 'view', 'cover', 'car', 'park', 'move', 'condit', 'sale', 'rmk', 'rental', 'rm', 'access', 'conveni', 'access', 'connaught', 'taman', 'len', 'sen',…	0	notfake	304105311973119.jpg	304105311973119	304105311973119.jpg	FAKE	1	304105311973119.jpg	jpg
1672	0	1687	5500000	6830	5	2	7	0	3	Tell Feoyz Teoh you saw this ad from DurianProperty to get best deal.Luxury Bungalow in the Legenda @ Southbay are situated close to the sea, the site is cushioned by lush greenery. Strong sea breeze coupled with mature greenery emphasizes a truly tropical sanctuary. Security is enhanced with full perimeter fencing and a unique entry guardhouse. Houses are arranged in two distinct rows each endin…	Southbay Legenda	Batu Maung	4	3	Southbay Legenda, Batu Maung	5.27927	100.286	1	1	https://cdn.durianproperty.com.my/images/classified_ads/300597211728722.jpeg	tell feoyz teoh saw ad durianproperty get best deal luxury bungalow legenda southbay situated close sea site cushioned lush greenery strong sea breeze coupled mature greenery emphasizes truly tropical sanctuary security enhanced full perimeter fencing unique entry guardhouse houses arranged two distinct rows ending cul de sacs enhancing privacy exclusivity land area sf built sf bedrooms bathrooms…	tell feoyz teoh saw ad durianproperti get best deal luxuri bungalow legenda southbay situat close sea site cushion lush greeneri strong sea breez coupl matur greeneri emphas truli tropic sanctuari secur enhanc full perimet fenc uniqu entri guardhous hous arrang two distinct row end cul de sac enhanc privaci exclus land area sf built sf bedroom bathroom fulli renov furnish luxuri design good renta…	['tell', 'feoyz', 'teoh', 'saw', 'ad', 'durianproperti', 'get', 'best', 'deal', 'luxuri', 'bungalow', 'legenda', 'southbay', 'situat', 'close', 'sea', 'site', 'cushion', 'lush', 'greeneri', 'strong', 'sea', 'breez', 'coupl', 'matur', 'greeneri', 'emphas', 'truli', 'tropic', 'sanctuari', 'secur', 'enhanc', 'full', 'perimet', 'fenc', 'uniqu', 'entri', 'guardhous', 'hous', 'arrang', 'two', 'distinct…	0	notfake	300597211728722.jpeg	300597211728722	300597211728722.jpeg	FAKE	1	300597211728722.jpeg	jpeg
1693	0	1708	299000	665	1	1	2	0	1	Tell Thomes Ng you saw this ad from DurianProperty to get best deal.Good Feng Shui Strategy Site: NO High Tension Cable Beside NO Cemetary and Tomb Beside NO RUMAHWIP Beside NO Oxidic Pond NO Highway Flyover Beside NOT Mining Land) Project Advantages: ------Greenery Theme Concept------ Multiple Height Garden Entrances Rain Forests Harvesting System 1 Arce Garden Themepark Garbage Disposal System …	M Arisa	Sentul	1	0	M Arisa, Sentul	3.20302	101.69	0	0	https://cdn.durianproperty.com.my/images/classified_ads/300142311697196.jpg	tell thomes ng saw ad durianproperty get best deal good feng shui strategy site high tension cable beside cemetary tomb beside rumahwip beside oxidic pond highway flyover beside mining land project advantages greenery theme concept multiple height garden entrances rain forests harvesting system arce garden themepark garbage disposal system natural cooling systems lagoon pool forest park sky garde…	tell thome ng saw ad durianproperti get best deal good feng shui strategi site high tension cabl besid cemetari tomb besid rumahwip besid oxid pond highway flyover besid mine land project advantag greeneri theme concept multipl height garden entranc rain forest harvest system arc garden themepark garbag dispos system natur cool system lagoon pool forest park sky garden park ev car charger sell po…	['tell', 'thome', 'ng', 'saw', 'ad', 'durianproperti', 'get', 'best', 'deal', 'good', 'feng', 'shui', 'strategi', 'site', 'high', 'tension', 'cabl', 'besid', 'cemetari', 'tomb', 'besid', 'rumahwip', 'besid', 'oxid', 'pond', 'highway', 'flyover', 'besid', 'mine', 'land', 'project', 'advantag', 'greeneri', 'theme', 'concept', 'multipl', 'height', 'garden', 'entranc', 'rain', 'forest', 'harvest', 's…	0	notfake	300142311697196.jpg	300142311697196	300142311697196.jpg	FAKE	1	300142311697196.jpg	jpg
2034	0	2052	400000	2152	3	1	4	0	1	Tell Yann you saw this ad from DurianProperty to get best deal.Great Community. Near Parks, Schools, Libraries, And Shops. Highlight : Modern Living Stylish & Modern Architectural design Lush Natural Greenery Unique Species Park 6km Jogging/Landscape walk trail Perimeter Fencing Children Playground Awards Winning Developer Matured Neighbourhood FREEHOLD & INDIVIDUAL TITLE FREE HOC ZERO DOWNPAYMEN…	Bandar Sri Sendayan	Seremban	3	1	Bandar Sri Sendayan, Seremban	2.67503	101.873	2	0	https://cdn.durianproperty.com.my/images/classified_ads/303848111956202.jpg	tell yann saw ad durianproperty get best deal great community near parks schools libraries shops highlight modern living stylish modern architectural design lush natural greenery unique species park km jogging landscape walk trail perimeter fencing children playground awards winning developer matured neighbourhood freehold individual title free hoc zero downpayment booking fee rm selling fast cal…	tell yann saw ad durianproperti get best deal great commun near park school librari shop highlight modern live stylish modern architectur design lush natur greeneri uniqu speci park km jog landscap walk trail perimet fenc children playground award win develop matur neighbourhood freehold individu titl free hoc zero downpay book fee rm sell fast call whatsapp you may view bandar sri sendayan profil	['tell', 'yann', 'saw', 'ad', 'durianproperti', 'get', 'best', 'deal', 'great', 'commun', 'near', 'park', 'school', 'librari', 'shop', 'highlight', 'modern', 'live', 'stylish', 'modern', 'architectur', 'design', 'lush', 'natur', 'greeneri', 'uniqu', 'speci', 'park', 'km', 'jog', 'landscap', 'walk', 'trail', 'perimet', 'fenc', 'children', 'playground', 'award', 'win', 'develop', 'matur', 'neighbou…	0	notfake	303848111956202.jpg	303848111956202	303848111956202.jpg	FAKE	1	303848111956202.jpg	jpg
2037	0	2055	360000	650	2	2	2	0	1	Tell Venus Soh you saw this ad from DurianProperty to get best deal.[0% DOWNPAYMENT] Tallest Sky-Lounge Freehold High-End Condominium! ‚úÖ Prime Location at Setapak/Gombak!! ‚úÖ Freehold!! ‚úÖ Low Density - 8 units per floor with 4 lifts!! ‚úÖ Fully Furnished!!You may view Setapak Profile here.	Setapak	Kuala Lumpur	1	0	Setapak, Kuala Lumpur	3.27905	101.741	0	0	https://cdn.durianproperty.com.my/images/classified_ads/300058911691574.jpg	tell venus soh saw ad durianproperty get best deal downpayment tallest sky lounge freehold high end condominium prime location setapak gombak freehold low density units per floor lifts fully furnished may view setapak profile	tell venu soh saw ad durianproperti get best deal downpay tallest sky loung freehold high end condominium prime locat setapak gombak freehold low densiti unit per floor lift fulli furnish may view setapak profil	['tell', 'venu', 'soh', 'saw', 'ad', 'durianproperti', 'get', 'best', 'deal', 'downpay', 'tallest', 'sky', 'loung', 'freehold', 'high', 'end', 'condominium', 'prime', 'locat', 'setapak', 'gombak', 'freehold', 'low', 'densiti', 'unit', 'per', 'floor', 'lift', 'fulli', 'furnish', 'may', 'view', 'setapak', 'profil']	0	notfake	300058911691574.jpg	300058911691574	300058911691574.jpg	FAKE	1	300058911691574.jpg	jpg
2038	0	2056	468000	1000	2	0	4	1	2	Tell Thomes Ng you saw this ad from DurianProperty to get best deal.Eco Green Concept Condominium Located between Wangsa Maju and Melawati Pre Launch Phase Now !!! To Grab More Early Bird Package, please click links below: ++ Why M Adora ++ --------------------------- ‚Ä¢ Free Bus to LRT Sri Rampai [ Saves petrol cost and time ] ‚Ä¢ Luxury Concept Design [ Start from only RM468K ] ‚Ä¢ Non Blocked…	M Adora	Taman Wangsa Melawati	0	0	M Adora, Taman Wangsa Melawati	3.20431	101.746	0	0	https://cdn.durianproperty.com.my/images/classified_ads/300141911697139.jpeg	tell thomes ng saw ad durianproperty get best deal eco green concept condominium located wangsa maju melawati pre launch phase grab early bird package please click links adora free bus lrt sri rampai saves petrol cost time luxury concept design start rmk non blocked view surrounded landed house different type access road kl city centre smooth traffic residential title shoplot strangers allowed ex…	tell thome ng saw ad durianproperti get best deal eco green concept condominium locat wangsa maju melawati pre launch phase grab earli bird packag pleas click link adora free bu lrt sri rampai save petrol cost time luxuri concept design start rmk non block view surround land hous differ type access road kl citi centr smooth traffic residenti titl shoplot stranger allow except visitor registr elec…	['tell', 'thome', 'ng', 'saw', 'ad', 'durianproperti', 'get', 'best', 'deal', 'eco', 'green', 'concept', 'condominium', 'locat', 'wangsa', 'maju', 'melawati', 'pre', 'launch', 'phase', 'grab', 'earli', 'bird', 'packag', 'pleas', 'click', 'link', 'adora', 'free', 'bu', 'lrt', 'sri', 'rampai', 'save', 'petrol', 'cost', 'time', 'luxuri', 'concept', 'design', 'start', 'rmk', 'non', 'block', 'view', '…	0	notfake	300141911697139.jpeg	300141911697139	300141911697139.jpeg	FAKE	1	300141911697139.jpeg	jpeg
2182	0	2201	700000	1635	3	0	4	1	3	Tell Safuan Rahman you saw this ad from DurianProperty to get best deal.FOR SALE : Double Storey House, Eco Grandeur, Type C facing open, Graham Garden, Puncak Alam . Fully reno. Move in condition . ======================== Asking Price : RM700,000 (Nego) ======================== . DETAILS : LEASEHOLD / Bumi Lot Land Area : 1300 sqft (20‚Äôx65‚Äô) Built up: 1,635sqft. Bedrooms : 4 Bathrooms : 3 R…	Eco Grandeur	Bandar Puncak Alam	0	1	Eco Grandeur, Bandar Puncak Alam	3.22574	101.456	0	0	https://cdn.durianproperty.com.my/images/classified_ads/299855711680725.jpg	tell safuan rahman saw ad durianproperty get best deal sale double storey house eco grandeur type c facing open graham garden puncak alam fully reno move condition asking price rm nego details leasehold bumi lot land area sqft x built sqft bedrooms bathrooms renovation wainscoting table top kitchen kabinet built microwave oven stove hood plaster ceilings lighting fan view appreciate key features …	tell safuan rahman saw ad durianproperti get best deal sale doubl storey hous eco grandeur type c face open graham garden puncak alam fulli reno move condit ask price rm nego detail leasehold bumi lot land area sqft x built sqft bedroom bathroom renov wainscot tabl top kitchen kabinet built microwav oven stove hood plaster ceil light fan view appreci key featur facil dragonfli lake cycl walk path…	['tell', 'safuan', 'rahman', 'saw', 'ad', 'durianproperti', 'get', 'best', 'deal', 'sale', 'doubl', 'storey', 'hous', 'eco', 'grandeur', 'type', 'c', 'face', 'open', 'graham', 'garden', 'puncak', 'alam', 'fulli', 'reno', 'move', 'condit', 'ask', 'price', 'rm', 'nego', 'detail', 'leasehold', 'bumi', 'lot', 'land', 'area', 'sqft', 'x', 'built', 'sqft', 'bedroom', 'bathroom', 'renov', 'wainscot', 't…	0	notfake	299855711680725.jpg	299855711680725	299855711680725.jpg	FAKE	1	299855711680725.jpg	jpg
2198	0	2217	560000	1409	2	0	3	0	1	Tell Dino Teh you saw this ad from DurianProperty to get best deal.- Freehold Residential Title - 1,409sf built up - 3 Bedroom 2 Bathroom - 1 car park - Mid Floor Level - Original Condition - Selling Rm560K Facilites: - 24 hours security - Swimming pool - Covered car park - Clubhouse - Gymnasium room - Lounge - Multi-purpose hall - Pool Deck - Playground - Sauna - 24 hours security - Swimming poo…	Elit Heights	Bayan Baru	4	0	Elit Heights, Bayan Baru	5.323	100.282	0	0	https://cdn.durianproperty.com.my/images/classified_ads/301010811757008.png	tell dino teh saw ad durianproperty get best deal freehold residential title sf built bedroom bathroom car park mid floor level original condition selling rmk facilites hours security swimming pool covered car park clubhouse gymnasium room lounge multi purpose hall pool deck playground sauna hours security swimming pool please contact information interested please contact dino teh specialize new …	tell dino teh saw ad durianproperti get best deal freehold residenti titl sf built bedroom bathroom car park mid floor level origin condit sell rmk facilit hour secur swim pool cover car park clubhous gymnasium room loung multi purpos hall pool deck playground sauna hour secur swim pool pleas contact inform interest pleas contact dino teh special new project subsal sell buy rent want buy sell ren…	['tell', 'dino', 'teh', 'saw', 'ad', 'durianproperti', 'get', 'best', 'deal', 'freehold', 'residenti', 'titl', 'sf', 'built', 'bedroom', 'bathroom', 'car', 'park', 'mid', 'floor', 'level', 'origin', 'condit', 'sell', 'rmk', 'facilit', 'hour', 'secur', 'swim', 'pool', 'cover', 'car', 'park', 'clubhous', 'gymnasium', 'room', 'loung', 'multi', 'purpos', 'hall', 'pool', 'deck', 'playground', 'sauna',…	0	notfake	301010811757008.png	301010811757008	301010811757008.png	FAKE	1	301010811757008.png	png
2219	0	2238	530000	864	2	1	3	1	2	You may view Meta City Profile here.	Meta City	Seri Kembangan	0	0	Meta City, Seri Kembangan	2.98273	101.661	0	0	https://cdn.durianproperty.com.my/images/classified_ads/300672211734498.png	may view meta city profile	may view meta citi profil	['may', 'view', 'meta', 'citi', 'profil']	0	notfake	300672211734498.png	300672211734498	300672211734498.png	FAKE	1	300672211734498.png	png
2347	0	2366	390000	1253	3	0	4	0	2	You may view Kepong 5 North Kiara Profile here.	Kepong 5 North Kiara	Kuala Lumpur	1	0	Kepong 5 North Kiara, Kuala Lumpur	3.19059	101.653	0	0	https://cdn.durianproperty.com.my/images/classified_ads/301003711756366.jpg	may view kepong north kiara profile	may view kepong north kiara profil	['may', 'view', 'kepong', 'north', 'kiara', 'profil']	0	notfake	301003711756366.jpg	301003711756366	301003711756366.jpg	FAKE	1	301003711756366.jpg	jpg
2352	0	2372	680000	2613	4	0	5	0	4	Tell Vivian Poh you saw this ad from DurianProperty to get best deal.New Launching Double Storey Terrace House (Eco Friendly Environment | Close to Bandar Sri Damansara ) Best Deal In town Landed Property CORNER | INTERMEDIATE | ENDLOT ( Available now) Individual Title Clubhouse Facalities 50- Acer Central Park Showroom is ready to visit Hurry Up Make Appointment : - AAA Estate Agents Sdn. Bhd. (…	Bandar Seri Coalfields	Sungai Buloh	0	1	Bandar Seri Coalfields, Sungai Buloh	3.24087	101.48	0	0	https://cdn.durianproperty.com.my/images/classified_ads/303860211957061.jpg	tell vivian poh saw ad durianproperty get best deal new launching double storey terrace house eco friendly environment close bandar sri damansara best deal town landed property corner intermediate endlot available individual title clubhouse facalities acer central park showroom ready visit hurry make appointment estate agents sdn bhd e may view bandar seri coalfields profile	tell vivian poh saw ad durianproperti get best deal new launch doubl storey terrac hous eco friendli environ close bandar sri damansara best deal town land properti corner intermedi endlot avail individu titl clubhous facal acer central park showroom readi visit hurri make appoint estat agent sdn bhd e may view bandar seri coalfield profil	['tell', 'vivian', 'poh', 'saw', 'ad', 'durianproperti', 'get', 'best', 'deal', 'new', 'launch', 'doubl', 'storey', 'terrac', 'hous', 'eco', 'friendli', 'environ', 'close', 'bandar', 'sri', 'damansara', 'best', 'deal', 'town', 'land', 'properti', 'corner', 'intermedi', 'endlot', 'avail', 'individu', 'titl', 'clubhous', 'facal', 'acer', 'central', 'park', 'showroom', 'readi', 'visit', 'hurri', 'ma…	0	notfake	303860211957061.jpg	303860211957061	303860211957061.jpg	FAKE	1	303860211957061.jpg	jpg
2363	0	2383	775000	2026	4	0	4	0	4	Tell Henry Lee you saw this ad from DurianProperty to get best deal.Rumah Teres Dua Tingkat CORNER yang baru berdekatan Kota Warisan, Bandar baru Salak Perdana, Dengkil, Hak Milik Kekal. Harga Jualan dari RM775000 nett 43x65, 2795 sqft Interest terendah 3.1%, 35 tahun >> bumi diskaun 12% >> Cash back RM20000 >> 100% Pinjaman LOAN ++,Lppsa boleh apply >> 0% Pembayaran Wang Pendahuluan tidak diperl…	Kota Warisan	Sepang	0	1	Kota Warisan, Sepang	2.82422	101.696	0	1	https://cdn.durianproperty.com.my/images/classified_ads/304651512011877.jpg	tell henry lee saw ad durianproperty get best deal new corner two storey terrace house near kota warisan new town salak perdana dengkil permanent ownership sale price rm nett x sqft lowest interest years land discount cash back rm loan loan lppsa apply payment required free sales agreement legal fees spa legal fees free loan legal fees loan legal fees free transfer land ownership mot please conta…	tell henri lee saw ad durianproperti get best deal new corner two storey terrac hous near kota warisan new town salak perdana dengkil perman ownership sale price rm nett x sqft lowest interest year land discount cash back rm loan loan lppsa appli payment requir free sale agreement legal fee spa legal fee free loan legal fee loan legal fee free transfer land ownership mot pleas contact detail info…	['tell', 'henri', 'lee', 'saw', 'ad', 'durianproperti', 'get', 'best', 'deal', 'new', 'corner', 'two', 'storey', 'terrac', 'hous', 'near', 'kota', 'warisan', 'new', 'town', 'salak', 'perdana', 'dengkil', 'perman', 'ownership', 'sale', 'price', 'rm', 'nett', 'x', 'sqft', 'lowest', 'interest', 'year', 'land', 'discount', 'cash', 'back', 'rm', 'loan', 'loan', 'lppsa', 'appli', 'payment', 'requir', '…	0	notfake	304651512011877.jpg	304651512011877	304651512011877.jpg	FAKE	1	304651512011877.jpg	jpg
2364	0	2384	323000	1107	2	0	3	0	1	Tell A Abang Zuhaili you saw this ad from DurianProperty to get best deal.PR1MA RESIDENSI BANDAR BUKIT MAHKOTA Cantik dan eksklusif yang akan siap sepenuhnya tahun 2021. Booking hanya RM500 sahaja. Hanya RM500 untuk menjadi milik anda. Apartment 650 unit di tanah seluas 5.46 ekar ini menyediakan 2 saiz unit iaitu: Saiz unit: Jenis A 849 kps 3 bilik tidur 2 bilik air 2 parking Saiz unit: Jenis B 1…	PR1MA Bandar Bukit Mahkota	Kajang	0	0	PR1MA Bandar Bukit Mahkota, Kajang	2.8839	101.798	0	0	https://cdn.durianproperty.com.my/images/classified_ads/305043912039946.png	tell abang zuhaili saw ad durianproperty get best deal prma residence bandar bukit mahkota beautiful exclusive fully completed booking rm rm unit apartment acres land provides unit sizes unit size type sq ft bedrooms bathrooms parking unit size type b sq ft bedrooms bathrooms parking facilities kindergarden nursery children playground reading room community hall surau gym room badminton basketbal…	tell abang zuhaili saw ad durianproperti get best deal prma resid bandar bukit mahkota beauti exclus fulli complet book rm rm unit apart acr land provid unit size unit size type sq ft bedroom bathroom park unit size type b sq ft bedroom bathroom park facil kindergarden nurseri children playground read room commun hall surau gym room badminton basketbal court easi access north south leka highway n…	['tell', 'abang', 'zuhaili', 'saw', 'ad', 'durianproperti', 'get', 'best', 'deal', 'prma', 'resid', 'bandar', 'bukit', 'mahkota', 'beauti', 'exclus', 'fulli', 'complet', 'book', 'rm', 'rm', 'unit', 'apart', 'acr', 'land', 'provid', 'unit', 'size', 'unit', 'size', 'type', 'sq', 'ft', 'bedroom', 'bathroom', 'park', 'unit', 'size', 'type', 'b', 'sq', 'ft', 'bedroom', 'bathroom', 'park', 'facil', 'ki…	0	notfake	305043912039946.png	305043912039946	305043912039946.png	FAKE	1	305043912039946.png	png
2374	0	2394	700000	908	2	2	4	0	2	Tell Adaline Leong you saw this ad from DurianProperty to get best deal. 01159568876 5 TYPE OF INVESTMENT U CAN MAKE HERE INCLUDE SHORT TERM AND LONG TERM INVESTMENT 1). SHORT TERM INVESTMENT - GRR Provide RM30,000/ years - Airbnb Provided (500/ Night) x (18 Days [occupancy rate From Airbnb Company])= RM9,000 (return u get every Month) GROSS PROFITS - WE HELP U RENT AND MANAGE!!!!! 2). LONG TERM …	Chambers Kuala Lumpur	Chow Kit	1	0	Chambers Kuala Lumpur, Chow Kit	3.15997	101.697	1	0	https://cdn.durianproperty.com.my/images/classified_ads/301143111766215.jpg	tell adaline leong saw ad durianproperty get best deal type investment you make include short term long term investment short term investment grr provide rm years airbnb provided night x days occupancy rate airbnb company rm return you get every month gross profits help you rent manage long term investment current market mco period rm month rental guarantee cover installment buy sell back project…	tell adalin leong saw ad durianproperti get best deal type invest you make includ short term long term invest short term invest grr provid rm year airbnb provid night x day occup rate airbnb compani rm return you get everi month gross profit help you rent manag long term invest current market mco period rm month rental guarante cover instal buy sell back project complet complet q you buy properti…	['tell', 'adalin', 'leong', 'saw', 'ad', 'durianproperti', 'get', 'best', 'deal', 'type', 'invest', 'you', 'make', 'includ', 'short', 'term', 'long', 'term', 'invest', 'short', 'term', 'invest', 'grr', 'provid', 'rm', 'year', 'airbnb', 'provid', 'night', 'x', 'day', 'occup', 'rate', 'airbnb', 'compani', 'rm', 'return', 'you', 'get', 'everi', 'month', 'gross', 'profit', 'help', 'you', 'rent', 'man…	0	notfake	301143111766215.jpg	301143111766215	301143111766215.jpg	FAKE	1	301143111766215.jpg	jpg
2387	0	2407	5688888	2285	5	1	4	1	1	Tell kamal AG you saw this ad from DurianProperty to get best deal.The Binjai, KLCC. Address: Jalan Binjai, Kuala Lumpur Type: Condominium Higher Level (KLCC view) 2285 sqft 3+1 bedroom 3+2 bathroom Available for immediate move in **Price: RM 5,688,888 ***Fully Furnished This condo is easily accessible via major road networks such as:- *Jalan Ampang, *Jalan Pinang, *Jalan Tun Razak, *Ampang-Kuala…	The Binjai	KLCC	1	0	The Binjai, KLCC	3.15472	101.718	0	0	https://cdn.durianproperty.com.my/images/classified_ads/283119710700096.jpg	tell kamal ag saw ad durianproperty get best deal binjai klcc address jalan binjai kuala lumpur type condominium higher level klcc view sqft bedroom bathroom available immediate move price rm fully furnished condo easily accessible via major road networks jalan ampang jalan pinang jalan tun razak ampang kuala lumpur elevated highway akleh jalan yap kwan seng also close amenities shopping malls su…	tell kamal ag saw ad durianproperti get best deal binjai klcc address jalan binjai kuala lumpur type condominium higher level klcc view sqft bedroom bathroom avail immedi move price rm fulli furnish condo easili access via major road network jalan ampang jalan pinang jalan tun razak ampang kuala lumpur elev highway akleh jalan yap kwan seng also close amen shop mall suria klcc avenu k klcc park k…	['tell', 'kamal', 'ag', 'saw', 'ad', 'durianproperti', 'get', 'best', 'deal', 'binjai', 'klcc', 'address', 'jalan', 'binjai', 'kuala', 'lumpur', 'type', 'condominium', 'higher', 'level', 'klcc', 'view', 'sqft', 'bedroom', 'bathroom', 'avail', 'immedi', 'move', 'price', 'rm', 'fulli', 'furnish', 'condo', 'easili', 'access', 'via', 'major', 'road', 'network', 'jalan', 'ampang', 'jalan', 'pinang', '…	0	notfake	283119710700096.jpg	283119710700096	283119710700096.jpg	FAKE	1	283119710700096.jpg	jpg
2432	0	2453	1600000	6157	5	2	5	0	4	Tell Shafiq Rahman you saw this ad from DurianProperty to get best deal.SHOW UNIT SEMI-D HOUSE FOR SALE . FULLY FURNISHED WITH COMPLETE INTERIOR DESIGN. . 2 Storey Semi-D House, Diamond City, Semenyih. . DETAILS: - FREEHOLD. - FULLY FURNISHED. - Land Size: 3,327 sq. ft. - Built-up Area: 6,157 sq. ft. - 5 Rooms & 5 Bathrooms. - Complete furniture as in pictures. - The whole house fully decorated w…	Diamond City	Semenyih	0	2	Diamond City, Semenyih	2.95131	101.858	0	0	https://cdn.durianproperty.com.my/images/classified_ads/304286411988898.jpg	tell shafiq rahman saw ad durianproperty get best deal show unit semi house sale fully furnished complete interior design storey semi house diamond city semenyih details freehold fully furnished land size sq ft built area sq ft rooms bathrooms complete furniture pictures whole house fully decorated modern exclusive design good retirement exclusive sq ft luxury spanish style clubhouse infinity poo…	tell shafiq rahman saw ad durianproperti get best deal show unit semi hous sale fulli furnish complet interior design storey semi hous diamond citi semenyih detail freehold fulli furnish land size sq ft built area sq ft room bathroom complet furnitur pictur whole hous fulli decor modern exclus design good retir exclus sq ft luxuri spanish style clubhous infin pool steam room gym entertain room in…	['tell', 'shafiq', 'rahman', 'saw', 'ad', 'durianproperti', 'get', 'best', 'deal', 'show', 'unit', 'semi', 'hous', 'sale', 'fulli', 'furnish', 'complet', 'interior', 'design', 'storey', 'semi', 'hous', 'diamond', 'citi', 'semenyih', 'detail', 'freehold', 'fulli', 'furnish', 'land', 'size', 'sq', 'ft', 'built', 'area', 'sq', 'ft', 'room', 'bathroom', 'complet', 'furnitur', 'pictur', 'whole', 'hous…	0	notfake	304286411988898.jpg	304286411988898	304286411988898.jpg	FAKE	1	304286411988898.jpg	jpg
2459	0	2480	300000	1000	2	2	3	0	2	Tell Alice Tan you saw this ad from DurianProperty to get best deal.KLCC Luxury Condo Ownstay 30% Below Market Price Starts from Rm300k 0% Downpayment !!! Rebate up to 20%++!!! Cash back Up to 10K Entitle HOC + Free MOT Free Legal and SNP Free LoanStamp Duty Free Disbursement Fee Booking Fee RM500 ÔºÅÔºÅÔºÅ 2-4room/2-3bath Unit Available : 734 ~1332 Sqft Min 2 Car Park for all unit Amenities - 6 …	Mont Kiara Damai	Mont Kiara	0	0	Mont Kiara Damai, Mont Kiara	3.17187	101.655	0	0	https://cdn.durianproperty.com.my/images/classified_ads/300407111714682.jpg	tell alice tan saw ad durianproperty get best deal klcc luxury condo ownstay market price starts rmk downpayment rebate cash back k entitle hoc free mot free legal snp free loanstamp duty free disbursement fee booking fee rm room bath unit available sqft min car park unit amenities km klcc min mid valley min sumway putra mall pj min mont kiara publika kepong walking distance mrt ktm guarantee low…	tell alic tan saw ad durianproperti get best deal klcc luxuri condo ownstay market price start rmk downpay rebat cash back k entitl hoc free mot free legal snp free loanstamp duti free disburs fee book fee rm room bath unit avail sqft min car park unit amen km klcc min mid valley min sumway putra mall pj min mont kiara publika kepong walk distanc mrt ktm guarante lowest psf town access direct lin…	['tell', 'alic', 'tan', 'saw', 'ad', 'durianproperti', 'get', 'best', 'deal', 'klcc', 'luxuri', 'condo', 'ownstay', 'market', 'price', 'start', 'rmk', 'downpay', 'rebat', 'cash', 'back', 'k', 'entitl', 'hoc', 'free', 'mot', 'free', 'legal', 'snp', 'free', 'loanstamp', 'duti', 'free', 'disburs', 'fee', 'book', 'fee', 'rm', 'room', 'bath', 'unit', 'avail', 'sqft', 'min', 'car', 'park', 'unit', 'ame…	0	notfake	300407111714682.jpg	300407111714682	300407111714682.jpg	FAKE	1	300407111714682.jpg	jpg
2532	0	2554	480000	900	2	0	3	0	2	Tell Ivan Wong you saw this ad from DurianProperty to get best deal.Most Affordable MRT Line Project in Town Limited Units !!! Project Details:- # FreeHold # Multi-Tier Security # Low Density @ one block only !! # 2 Rooms 2 Bathrooms @ 399K++ # 3 Rooms 2 Bathrooms @ 480K++ Amenities:- #1 min walk to MRT # 5 min to Leisure Mall # 5 min to C180 # 5 min to Mahkota Cheras Package:- # Free SPA Legal &…	Taman Cheras Awana	Cheras	0	0	Taman Cheras Awana, Cheras	3.08937	101.762	0	1	https://cdn.durianproperty.com.my/images/classified_ads/303437211928732.jpg	tell ivan wong saw ad durianproperty get best deal affordable mrt line project town limited units project details freehold multi tier security low density one block rooms bathrooms k rooms bathrooms k amenities min walk mrt min leisure mall min c min mahkota cheras package free spa legal disbursement fee free loan legal disbursement fee free loan stamp duty kindly contact ivan wong register view …	tell ivan wong saw ad durianproperti get best deal afford mrt line project town limit unit project detail freehold multi tier secur low densiti one block room bathroom k room bathroom k amen min walk mrt min leisur mall min c min mahkota chera packag free spa legal disburs fee free loan legal disburs fee free loan stamp duti kindli contact ivan wong regist view show unit thank ivan mani buyer com…	['tell', 'ivan', 'wong', 'saw', 'ad', 'durianproperti', 'get', 'best', 'deal', 'afford', 'mrt', 'line', 'project', 'town', 'limit', 'unit', 'project', 'detail', 'freehold', 'multi', 'tier', 'secur', 'low', 'densiti', 'one', 'block', 'room', 'bathroom', 'k', 'room', 'bathroom', 'k', 'amen', 'min', 'walk', 'mrt', 'min', 'leisur', 'mall', 'min', 'c', 'min', 'mahkota', 'chera', 'packag', 'free', 'spa…	1	fake	303437211928732.jpg	303437211928732	303437211928732.jpg	FAKE	1	303437211928732.jpg	jpg
2533	0	2555	950000	313632	0	0	0	0	0	Tell MOHD FAIDIL you saw this ad from DurianProperty to get best deal.WTS You may view Bidor Profile here.	Bidor	Perak	5	5	Bidor, Perak	4.11161	101.288	0	0	https://cdn.durianproperty.com.my/images/classified_ads/304095611972586.jpg	tell mohd faidil saw ad durianproperty get best deal wts may view bidor profile	tell mohd faidil saw ad durianproperti get best deal wt may view bidor profil	['tell', 'mohd', 'faidil', 'saw', 'ad', 'durianproperti', 'get', 'best', 'deal', 'wt', 'may', 'view', 'bidor', 'profil']	0	notfake	304095611972586.jpg	304095611972586	304095611972586.jpg	FAKE	1	304095611972586.jpg	jpg
2534	0	2556	400000	722	2	0	4	0	2	Tell tayjer you saw this ad from DurianProperty to get best deal.New Freehold Residences in Between Mont Kiara & KL Metropolis ! [500m to MITEC MATRADE] IDEAL LAYOUT FOR OWNSTAY & INVESTMENT (2-4BEDROOMS/Dual Key unit Available) Tired of looking for affordable housing price in KL prime area ! This is it, this is YOUR GOLDEN OPPORTUNITY ! STARTING FROM 400K+ All 1st home buyers are welcome with ou…	Suria @ North Kiara	Segambut	1	0	Suria @ North Kiara, Segambut	3.18471	101.646	0	0	https://cdn.durianproperty.com.my/images/classified_ads/300273411705574.jpg	tell tayjer saw ad durianproperty get best deal new freehold residences mont kiara kl metropolis m mitec matrade ideal layout ownstay investment bedrooms dual key unit available tired looking affordable housing price kl prime area golden opportunity starting k st home buyers welcome exclusive rebates hoc free legal fees units come min carparks walking distance ktm mrt stations mins mont kiara hig…	tell tayjer saw ad durianproperti get best deal new freehold resid mont kiara kl metropoli m mitec matrad ideal layout ownstay invest bedroom dual key unit avail tire look afford hous price kl prime area golden opportun start k st home buyer welcom exclus rebat hoc free legal fee unit come min carpark walk distanc ktm mrt station min mont kiara high end residenti mint publika acr land freehold hi…	['tell', 'tayjer', 'saw', 'ad', 'durianproperti', 'get', 'best', 'deal', 'new', 'freehold', 'resid', 'mont', 'kiara', 'kl', 'metropoli', 'm', 'mitec', 'matrad', 'ideal', 'layout', 'ownstay', 'invest', 'bedroom', 'dual', 'key', 'unit', 'avail', 'tire', 'look', 'afford', 'hous', 'price', 'kl', 'prime', 'area', 'golden', 'opportun', 'start', 'k', 'st', 'home', 'buyer', 'welcom', 'exclus', 'rebat', '…	0	notfake	300273411705574.jpg	300273411705574	300273411705574.jpg	FAKE	1	300273411705574.jpg	jpg
2569	0	2591	2989888	4369	5	0	7	1	3	Tell Abdul Muiz Bin Misri you saw this ad from DurianProperty to get best deal.AMBER Bungalow Double Storey @ Subang Bestari, Shah Alam, Selangor ========================================= OFFER PRICE FROM RM 2,989,888 - RM 5,000,000 ========================================= ** Booking only RM10k! (fully refund if loan reject) **Exclusive modern tropical living-in-the-garden concept **Open layout …	Subang Bestari	Subang	0	3	Subang Bestari, Subang	3.17673	101.545	0	0	https://cdn.durianproperty.com.my/images/classified_ads/301437411788157.png	tell abdul muiz bin misri saw ad durianproperty get best deal amber bungalow double storey subang bestari shah alam selangor offer price rm rm booking rmk fully refund loan reject exclusive modern tropical living garden concept open layout design promotes sense spaciousness luxury double volume space natural ventilation lighting low density property details total unit completion date april leaseh…	tell abdul muiz bin misri saw ad durianproperti get best deal amber bungalow doubl storey subang bestari shah alam selangor offer price rm rm book rmk fulli refund loan reject exclus modern tropic live garden concept open layout design promot sens spacious luxuri doubl volum space natur ventil light low densiti properti detail total unit complet date april leasehold built area sqft sqft lot size …	['tell', 'abdul', 'muiz', 'bin', 'misri', 'saw', 'ad', 'durianproperti', 'get', 'best', 'deal', 'amber', 'bungalow', 'doubl', 'storey', 'subang', 'bestari', 'shah', 'alam', 'selangor', 'offer', 'price', 'rm', 'rm', 'book', 'rmk', 'fulli', 'refund', 'loan', 'reject', 'exclus', 'modern', 'tropic', 'live', 'garden', 'concept', 'open', 'layout', 'design', 'promot', 'sens', 'spacious', 'luxuri', 'doub…	0	notfake	301437411788157.png	301437411788157	301437411788157.png	FAKE	1	301437411788157.png	png
2617	0	2639	1245888	3230	3	0	3	1	3	Tell Jimmy Goh you saw this ad from DurianProperty to get best deal.Â•ΩÊ∂àÊÅØÂÖ®È©¨ÊúÄÂÄºÂæó‰π∞ÁöÑÂ∑•ÂéÇ ÔºåÂ∞±Âú®ÂçóÂåóÂΩìÈÅìËæπNorth-South Expressway Ôºå‰π∞Âà∞ËÇØÂÆöËµöÂà∞„ÄÇ Êñ∞Â∑•ÂéÇ‰∏ÄÂ±ÇÂçäÂ∑•ÂéÇ(1.5 Sty) Pls Contact Jimmy Goh 012-202 9977 for listing (Q 2347) Land Area : 30 x 80 Built Up: 3,230 sf RM 1,245,888 Land Area : 36 x 80 Built Up: 3,900 sf RM 1,494,688 2 Access entrance 80 ft 24 H…	Pandan Indah	Pandan	1	4	Pandan Indah, Pandan	3.12203	101.742	0	0	https://cdn.durianproperty.com.my/images/classified_ads/295961611414818.jpg	tell jimmy goh saw ad durianproperty get best deal good news worthwhile factory malaysia located north south expressway buy definitely make money new factory one half floors factory sty pls contact jimmy goh listing q land area x built sf rm land area x built sf rm access entrance ft hour security gated community front road ft back road ft front roller shutter high ft back roller shutter high ft …	tell jimmi goh saw ad durianproperti get best deal good news worthwhil factori malaysia locat north south expressway buy definit make money new factori one half floor factori sti pl contact jimmi goh list q land area x built sf rm land area x built sf rm access entranc ft hour secur gate commun front road ft back road ft front roller shutter high ft back roller shutter high ft problem still rent …	['tell', 'jimmi', 'goh', 'saw', 'ad', 'durianproperti', 'get', 'best', 'deal', 'good', 'news', 'worthwhil', 'factori', 'malaysia', 'locat', 'north', 'south', 'expressway', 'buy', 'definit', 'make', 'money', 'new', 'factori', 'one', 'half', 'floor', 'factori', 'sti', 'pl', 'contact', 'jimmi', 'goh', 'list', 'q', 'land', 'area', 'x', 'built', 'sf', 'rm', 'land', 'area', 'x', 'built', 'sf', 'rm', 'a…	0	notfake	295961611414818.jpg	295961611414818	295961611414818.jpg	FAKE	1	295961611414818.jpg	jpg
2702	0	2725	2100000	2146	4	2	2	0	2	Tell Daniel Koay Liam Yew you saw this ad from DurianProperty to get best deal.DISCLAIMER: This is a REAL ADVERTISEMENT and you DESERVE THE REAL INFORMATION. I DON'T advertise fake listing / price / fake pictures to solicit client. Thank you. Quayside @ Tanjung Tokong - Great accesible to Georgetown, Batu Ferringhi, Tanjung Tokong and Tanjung Bungah. - Neighbours: Tanjung Park, City Residence, St…	Quayside Seafront Resort Condominiums	Seri Tanjung Pinang	4	0	Quayside Seafront Resort Condominiums, Seri Tanjung Pinang	5.45962	100.312	0	0	https://cdn.durianproperty.com.my/images/classified_ads/304850812026219.jpg	tell daniel koay liam yew saw ad durianproperty get best deal disclaimer real advertisement deserve real information advertise fake listing price fake pictures solicit client thank quayside tanjung tokong great accesible georgetown batu ferringhi tanjung tokong tanjung bungah neighbours tanjung park city residence straits quay quayside andaman tamarind jazz residence marinox brezza great accessib…	tell daniel koay liam yew saw ad durianproperti get best deal disclaim real advertis deserv real inform advertis fake list price fake pictur solicit client thank quaysid tanjung tokong great acces georgetown batu ferringhi tanjung tokong tanjung bungah neighbour tanjung park citi resid strait quay quaysid andaman tamarind jazz resid marinox brezza great access near tesco strait quay island plaza …	['tell', 'daniel', 'koay', 'liam', 'yew', 'saw', 'ad', 'durianproperti', 'get', 'best', 'deal', 'disclaim', 'real', 'advertis', 'deserv', 'real', 'inform', 'advertis', 'fake', 'list', 'price', 'fake', 'pictur', 'solicit', 'client', 'thank', 'quaysid', 'tanjung', 'tokong', 'great', 'acces', 'georgetown', 'batu', 'ferringhi', 'tanjung', 'tokong', 'tanjung', 'bungah', 'neighbour', 'tanjung', 'park',…	0	notfake	304850812026219.jpg	304850812026219	304850812026219.jpg	FAKE	1	304850812026219.jpg	jpg
2737	0	2761	1088000	16000	3	0	3	1	3	Tell Vivian Ong you saw this ad from DurianProperty to get best deal. GOOD FENG SHUI Bungalow Land for sale !! Limited Lot Property: Bungalow Land Location: Taman Cheras Jaya, Balakong Land Size:16k sf Tenure:Leasehold Status : Vacant Asking Per sqft: RM68psf nego Drop me a call if you like to view Link for more properties :- Don‚Äôt Worry , I Am Registered Under The Board Of Valuers Appraiser An…	Taman Cheras Jaya	Balakong	0	5	Taman Cheras Jaya, Balakong	3.0221	101.759	0	2	https://cdn.durianproperty.com.my/images/classified_ads/305034212039279.jpg	tell vivian ong saw ad durianproperty get best deal good feng shui bungalow land sale limited lot property bungalow land location taman cheras jaya balakong land size k sf tenure leasehold status vacant asking per sqft rmpsf nego drop call like view link properties worry registered board valuers appraiser estate agents malaysia owner welcome list disclaimer protect owner tenant privacy pictures s…	tell vivian ong saw ad durianproperti get best deal good feng shui bungalow land sale limit lot properti bungalow land locat taman chera jaya balakong land size k sf tenur leasehold statu vacant ask per sqft rmpsf nego drop call like view link properti worri regist board valuer apprais estat agent malaysia owner welcom list disclaim protect owner tenant privaci pictur shown may actual unit illust…	['tell', 'vivian', 'ong', 'saw', 'ad', 'durianproperti', 'get', 'best', 'deal', 'good', 'feng', 'shui', 'bungalow', 'land', 'sale', 'limit', 'lot', 'properti', 'bungalow', 'land', 'locat', 'taman', 'chera', 'jaya', 'balakong', 'land', 'size', 'k', 'sf', 'tenur', 'leasehold', 'statu', 'vacant', 'ask', 'per', 'sqft', 'rmpsf', 'nego', 'drop', 'call', 'like', 'view', 'link', 'properti', 'worri', 'reg…	1	fake	305034212039279.jpg	305034212039279	305034212039279.jpg	FAKE	1	305034212039279.jpg	jpg
2821	0	2847	1450000	82328	0	0	0	0	0	Tell MOHD FAUZI MOHAMED you saw this ad from DurianProperty to get best deal.FREEHOLD AGRICULTURE LAND FOR SALE UNIT & DEVELOPMENT CHARACTERISTICS Type: Commercial Land Tenure: Freehold / Malay Reserved Land Area: 82,514 sf / 1.89 Acres Position: Intermediate Occupancy: Vacant Land ADDITIONAL FEATURES Infrastructure Ready Next to Facilities Near to Residential ACCESSIBILITY MEX Highway SKVE Highw…	Banting	Selangor	0	5	Banting, Selangor	2.8121	101.503	0	0	https://cdn.durianproperty.com.my/images/classified_ads/300808111744473.jpg	tell mohd fauzi mohamed saw ad durianproperty get best deal freehold agriculture land sale unit development characteristics type commercial land tenure freehold malay reserved land area sf acres position intermediate occupancy vacant land additional features infrastructure ready next facilities near residential accessibility mex highway skve highway kesas highway dengkil klia asking price rm nego…	tell mohd fauzi moham saw ad durianproperti get best deal freehold agricultur land sale unit develop characterist type commerci land tenur freehold malay reserv land area sf acr posit intermedi occup vacant land addit featur infrastructur readi next facil near residenti access mex highway skve highway kesa highway dengkil klia ask price rm nego inquiri view appoint pleas call whatapp fauzi you ma…	['tell', 'mohd', 'fauzi', 'moham', 'saw', 'ad', 'durianproperti', 'get', 'best', 'deal', 'freehold', 'agricultur', 'land', 'sale', 'unit', 'develop', 'characterist', 'type', 'commerci', 'land', 'tenur', 'freehold', 'malay', 'reserv', 'land', 'area', 'sf', 'acr', 'posit', 'intermedi', 'occup', 'vacant', 'land', 'addit', 'featur', 'infrastructur', 'readi', 'next', 'facil', 'near', 'residenti', 'acc…	0	notfake	300808111744473.jpg	300808111744473	300808111744473.jpg	FAKE	1	300808111744473.jpg	jpg
2825	0	2851	156000	1200	2	0	3	1	2	You may view Bidor Profile here.	Bidor	Perak	5	1	Bidor, Perak	4.11161	101.288	0	0	https://cdn.durianproperty.com.my/images/classified_ads/303327111921929.jpg	may view bidor profile	may view bidor profil	['may', 'view', 'bidor', 'profil']	0	notfake	303327111921929.jpg	303327111921929	303327111921929.jpg	FAKE	1	303327111921929.jpg	jpg
2852	0	2878	420000	893	2	0	3	0	2	Tell Ezad Property you saw this ad from DurianProperty to get best deal.Kiara Plaza Service Apartment Kajang/Semenyih |Partially Furnished| For Sale PROPERTY DETAILS ==================== - Leasehold - Non Bumi Lot - Level 18 - Rooms : 3 - Bathroom : 2 - Size : 893 . - Car park : 2 -water heater -lamp & fan -kitchen cabinet AMENITIES ===================== - Kajang Hill Golf Club - Billion supermar…	Kiara Plaza	Semenyih	0	0	Kiara Plaza, Semenyih	2.9626	101.837	0	0	https://cdn.durianproperty.com.my/images/classified_ads/303879511958279.jpg	tell ezad property saw ad durianproperty get best deal kiara plaza service apartment kajang semenyih partially furnished sale property details leasehold non bumi lot level rooms bathroom size car park water heater lamp fan kitchen cabinet amenities kajang hill golf club billion supermarket mydin wholesale hypermarket post offices econsave semenyih town tesco semenyih hospital kajang kpj kajang sp…	tell ezad properti saw ad durianproperti get best deal kiara plaza servic apart kajang semenyih partial furnish sale properti detail leasehold non bumi lot level room bathroom size car park water heater lamp fan kitchen cabinet amen kajang hill golf club billion supermarket mydin wholesal hypermarket post offic econsav semenyih town tesco semenyih hospit kajang kpj kajang specialist hospit smk en…	['tell', 'ezad', 'properti', 'saw', 'ad', 'durianproperti', 'get', 'best', 'deal', 'kiara', 'plaza', 'servic', 'apart', 'kajang', 'semenyih', 'partial', 'furnish', 'sale', 'properti', 'detail', 'leasehold', 'non', 'bumi', 'lot', 'level', 'room', 'bathroom', 'size', 'car', 'park', 'water', 'heater', 'lamp', 'fan', 'kitchen', 'cabinet', 'amen', 'kajang', 'hill', 'golf', 'club', 'billion', 'supermar…	0	notfake	303879511958279.jpg	303879511958279	303879511958279.jpg	FAKE	1	303879511958279.jpg	jpg
2857	0	2883	8400000	70000	3	0	3	0	3	Tell Benny Chew you saw this ad from DurianProperty to get best deal.6pcs Industry Land Freehold - Kundang Industrial Park, Rawang, Selangor Tenure : Freehold Category Of Land Use : Industry Infrastructure : Fully completed Land Area A - 22,938sf B - 23,616sf C - 21,668sf D - 18,826sf E - 21,377sf F - 22,852sf Total: 131,277sf / 3 acre - can be sold together/ separately Remarks 1) Good location 2…	Kundang Industrial Park	Rawang	0	5	Kundang Industrial Park, Rawang	3.28388	101.52	0	0	https://cdn.durianproperty.com.my/images/classified_ads/283385210713908.jpg	tell benny chew saw ad durianproperty get best deal pcs industry land freehold kundang industrial park rawang selangor tenure freehold category land use industry infrastructure fully completed land area sf b sf c sf sf e sf f sf total sf acre sold together separately remarks good location easy access flat land ready build land sold together separately selling price rm psf call benny whatsapp emai…	tell benni chew saw ad durianproperti get best deal pc industri land freehold kundang industri park rawang selangor tenur freehold categori land use industri infrastructur fulli complet land area sf b sf c sf sf e sf f sf total sf acr sold togeth separ remark good locat easi access flat land readi build land sold togeth separ sell price rm psf call benni whatsapp email benni see list may view kun…	['tell', 'benni', 'chew', 'saw', 'ad', 'durianproperti', 'get', 'best', 'deal', 'pc', 'industri', 'land', 'freehold', 'kundang', 'industri', 'park', 'rawang', 'selangor', 'tenur', 'freehold', 'categori', 'land', 'use', 'industri', 'infrastructur', 'fulli', 'complet', 'land', 'area', 'sf', 'b', 'sf', 'c', 'sf', 'sf', 'e', 'sf', 'f', 'sf', 'total', 'sf', 'acr', 'sold', 'togeth', 'separ', 'remark', …	0	notfake	283385210713908.jpg	283385210713908	283385210713908.jpg	FAKE	1	283385210713908.jpg	jpg
2887	0	2913	250000	1650	4	0	4	1	3	Tell ng hui qi you saw this ad from DurianProperty to get best deal.*No. 15, Jalan Bestari 26, Taman Mutiara Rini, 81300 Skudai, Johor*You may view Taman Mutiara Rini Profile here.	Taman Mutiara Rini	Skudai	2	1	Taman Mutiara Rini, Skudai	1.52453	103.64	0	0	https://cdn.durianproperty.com.my/images/classified_ads/299895111682674.jpg	tell ng hui qi saw ad durianproperty get best deal jalan bestari taman mutiara rini skudai johor may view taman mutiara rini profile	tell ng hui qi saw ad durianproperti get best deal jalan bestari taman mutiara rini skudai johor may view taman mutiara rini profil	['tell', 'ng', 'hui', 'qi', 'saw', 'ad', 'durianproperti', 'get', 'best', 'deal', 'jalan', 'bestari', 'taman', 'mutiara', 'rini', 'skudai', 'johor', 'may', 'view', 'taman', 'mutiara', 'rini', 'profil']	0	notfake	299895111682674.jpg	299895111682674	299895111682674.jpg	FAKE	1	299895111682674.jpg	jpg
2888	0	2914	387096	1010	2	1	5	0	2	Tell KEVIN LEE you saw this ad from DurianProperty to get best deal.LakeFront Homes in Cyberjaya, Selengor For Sale NEW TOWER OFFICIAL LAUNCHING * EXCLUSIVE SERVICE & SURPRISE FOR YOU !* - FREE CONSULT - Bank Loan Advisory - First Home Buyer Guide Line - Feng-Shui Units Number Advisory - & More & More & More...... *Our Team & Partners provide:* - Sell/Rent Service After Completion - ID Design, Re…	Lakefront Residence	Cyberjaya	7	0	Lakefront Residence, Cyberjaya	2.93295	101.643	0	1	https://cdn.durianproperty.com.my/images/classified_ads/289246011015466.jpg	tell kevin lee saw ad durianproperty get best deal lakefront homes cyberjaya selengor sale new tower official launching exclusive service surprise free consult bank loan advisory first home buyer guide line feng shui units number advisory team partners provide sell rent service completion id design renovation furniture team feng shui advisory please contact lakefront homes specialist mystery pack…	tell kevin lee saw ad durianproperti get best deal lakefront home cyberjaya selengor sale new tower offici launch exclus servic surpris free consult bank loan advisori first home buyer guid line feng shui unit number advisori team partner provid sell rent servic complet id design renov furnitur team feng shui advisori pleas contact lakefront home specialist mysteri packag super low payment call d…	['tell', 'kevin', 'lee', 'saw', 'ad', 'durianproperti', 'get', 'best', 'deal', 'lakefront', 'home', 'cyberjaya', 'selengor', 'sale', 'new', 'tower', 'offici', 'launch', 'exclus', 'servic', 'surpris', 'free', 'consult', 'bank', 'loan', 'advisori', 'first', 'home', 'buyer', 'guid', 'line', 'feng', 'shui', 'unit', 'number', 'advisori', 'team', 'partner', 'provid', 'sell', 'rent', 'servic', 'complet'…	0	notfake	289246011015466.jpg	289246011015466	289246011015466.jpg	FAKE	1	289246011015466.jpg	jpg
2899	0	2925	375000	810	2	1	3	1	2	Breaking News..... 20% lower than Market Value ..... Really? With low price and high Value, is it what you are looking for in a property? Yes, we do have the same thought! Price to Value.... Have a thought on our new project which is inclusive of them all in Shah Alam:- 1) Strategic Venue with many amenities 2) Easy Access from many major links 3) Hassle Free on Public Transport 4) Surrounded wit…	DIAN Residency	Shah Alam	0	0	DIAN Residency, Shah Alam	3.08948	101.547	0	0	https://cdn.durianproperty.com.my/images/classified_ads/299603911674190.jpg	breaking news lower market value really low price high value looking property yes thought price value thought new project inclusive shah alam strategic venue many amenities easy access many major links hassle free public transport surrounded malls choices hypermarket high occupancy rates telling properties high demand universities surrounding good place learning renting free legal fees free finan…	break news lower market valu realli low price high valu look properti ye thought price valu thought new project inclus shah alam strateg venu mani amen easi access mani major link hassl free public transport surround mall choic hypermarket high occup rate tell properti high demand univers surround good place learn rent free legal fee free financi advic low book fee mco rm info pleas click link ma…	['break', 'news', 'lower', 'market', 'valu', 'realli', 'low', 'price', 'high', 'valu', 'look', 'properti', 'ye', 'thought', 'price', 'valu', 'thought', 'new', 'project', 'inclus', 'shah', 'alam', 'strateg', 'venu', 'mani', 'amen', 'easi', 'access', 'mani', 'major', 'link', 'hassl', 'free', 'public', 'transport', 'surround', 'mall', 'choic', 'hypermarket', 'high', 'occup', 'rate', 'tell', 'propert…	0	notfake	299603911674190.jpg	299603911674190	299603911674190.jpg	FAKE	1	299603911674190.jpg	jpg
3096	0	3124	470000	1033	2	1	3	1	2	Tell Billy Chan you saw this ad from DurianProperty to get best deal.##NEWLY LAUNCHED PROJECT ~Short distance to Midvalley, Bandar Malaysia ~Surrounded by schools, ideal for family with kids Price: Starting RM470k ~Size :1033 sq ft ~2 Parking Lots ~3 Rooms 2 Bathrooms ~24 hour security & guarded & Gated ~Good location for own stay or investment FACILITIES ~Swimming Pool ~Gym ~Playgrounds ~Praying…	Old Klang Road	Kuala Lumpur	1	0	Old Klang Road, Kuala Lumpur	3.10887	101.678	0	0	https://cdn.durianproperty.com.my/images/classified_ads/304045511968850.jpg	tell billy chan saw ad durianproperty get best deal newly launched project short distance midvalley bandar malaysia surrounded schools ideal family kids price starting rmk size sq ft parking lots rooms bathrooms hour security guarded gated good location stay investment facilities swimming pool gym playgrounds praying room hurry limited units available please contact billy information may view old…	tell billi chan saw ad durianproperti get best deal newli launch project short distanc midvalley bandar malaysia surround school ideal famili kid price start rmk size sq ft park lot room bathroom hour secur guard gate good locat stay invest facil swim pool gym playground pray room hurri limit unit avail pleas contact billi inform may view old klang road profil	['tell', 'billi', 'chan', 'saw', 'ad', 'durianproperti', 'get', 'best', 'deal', 'newli', 'launch', 'project', 'short', 'distanc', 'midvalley', 'bandar', 'malaysia', 'surround', 'school', 'ideal', 'famili', 'kid', 'price', 'start', 'rmk', 'size', 'sq', 'ft', 'park', 'lot', 'room', 'bathroom', 'hour', 'secur', 'guard', 'gate', 'good', 'locat', 'stay', 'invest', 'facil', 'swim', 'pool', 'gym', 'play…	0	notfake	304045511968850.jpg	304045511968850	304045511968850.jpg	FAKE	1	304045511968850.jpg	jpg
3118	0	3146	8375281	288802	3	0	3	0	3	Tell Sally Wong Sex Lee you saw this ad from DurianProperty to get best deal.Ampangan, Seremban Negeri Sembilan 6.63 Acres Industrial Land Land For Sale Selling Price: RM 8,375,281.20 Kindly Call for viewing: SALLY 016-660 1360 SALLY 016-660 1360 Welcome to visit my property website: Property Details: Land Area: 6.63 Acres (288,802.80 s.f) Status: Industrial Land Tenure: Freehold Advantage: From …	Ampangan	Seremban	3	5	Ampangan, Seremban	2.73588	101.976	0	0	https://cdn.durianproperty.com.my/images/classified_ads/300286811706517.jpg	tell sally wong sex lee saw ad durianproperty get best deal ampangan seremban negeri sembilan acres industrial land land sale selling price rm kindly call viewing sally sally welcome visit property website property details land area acres f status industrial land tenure freehold advantage lekas lebuhraya kajang seremban exit ampangan price per square feet price rm ampangan seremban negeri sembila…	tell salli wong sex lee saw ad durianproperti get best deal ampangan seremban negeri sembilan acr industri land land sale sell price rm kindli call view salli salli welcom visit properti websit properti detail land area acr f statu industri land tenur freehold advantag leka lebuhraya kajang seremban exit ampangan price per squar feet price rm ampangan seremban negeri sembilan acr industri land la…	['tell', 'salli', 'wong', 'sex', 'lee', 'saw', 'ad', 'durianproperti', 'get', 'best', 'deal', 'ampangan', 'seremban', 'negeri', 'sembilan', 'acr', 'industri', 'land', 'land', 'sale', 'sell', 'price', 'rm', 'kindli', 'call', 'view', 'salli', 'salli', 'welcom', 'visit', 'properti', 'websit', 'properti', 'detail', 'land', 'area', 'acr', 'f', 'statu', 'industri', 'land', 'tenur', 'freehold', 'advanta…	0	notfake	300286811706517.jpg	300286811706517	300286811706517.jpg	FAKE	1	300286811706517.jpg	jpg
3217	0	3245	350000	848	1	0	2	0	2	Tell Andy Ng you saw this ad from DurianProperty to get best deal.SPA Price: RM562,800 Selling Price: RM280,000 Bank Valuation: RM 330,000 Able to mark up or cash out Disclaimer: All Image Shown Are for Illustration Purpose Only. No actual unit photo ==================================== FACILITIES: ==================================== -- 24 HOURS SECURITY -- EXCLUSIVE SECURITY AND FEATURES -- COM…	Menara Paragon @ Pan'gaea	Cyberjaya	7	0	Menara Paragon @ Pan'gaea, Cyberjaya	2.92402	101.637	0	0	https://cdn.durianproperty.com.my/images/classified_ads/304280211988345.jpg	tell andy ng saw ad durianproperty get best deal spa price rm selling price rm bank valuation rm able mark cash disclaimer image shown illustration purpose actual unit photo facilities hours security exclusive security features comprehensive facilities swimming pool gym room sauna etc call appointment viewing thank corporate units available call info info viewing andy ng ren call whatsapp owner w…	tell andi ng saw ad durianproperti get best deal spa price rm sell price rm bank valuat rm abl mark cash disclaim imag shown illustr purpos actual unit photo facil hour secur exclus secur featur comprehens facil swim pool gym room sauna etc call appoint view thank corpor unit avail call info info view andi ng ren call whatsapp owner welcom list kind properti kuala lumpur selangor sell rent buy ki…	['tell', 'andi', 'ng', 'saw', 'ad', 'durianproperti', 'get', 'best', 'deal', 'spa', 'price', 'rm', 'sell', 'price', 'rm', 'bank', 'valuat', 'rm', 'abl', 'mark', 'cash', 'disclaim', 'imag', 'shown', 'illustr', 'purpos', 'actual', 'unit', 'photo', 'facil', 'hour', 'secur', 'exclus', 'secur', 'featur', 'comprehens', 'facil', 'swim', 'pool', 'gym', 'room', 'sauna', 'etc', 'call', 'appoint', 'view', '…	1	fake	304280211988345.jpg	304280211988345	304280211988345.jpg	FAKE	1	304280211988345.jpg	jpg
3239	0	3267	1080000	2200	4	0	4	1	2	Tell Bailey Tan you saw this ad from DurianProperty to get best deal.Brand New Ampang Landed Property Hurry up to Contact or Whatsapp Bailey Tan 012-3431061 For Viewing or More Information. * Green Eco Environment * Forest Fronted Mountain Area * Low Density Super High End area * Land area 33Acres ________________________________ # 300 units # Free SPA Legal # Disbursement # Free Loan Legal # Sta…	Taman Melawati	Kuala Lumpur	1	2	Taman Melawati, Kuala Lumpur	3.21258	101.747	0	0	https://cdn.durianproperty.com.my/images/classified_ads/301099011762810.jpg	tell bailey tan saw ad durianproperty get best deal brand new ampang landed property hurry contact whatsapp bailey tan viewing information green eco environment forest fronted mountain area low density super high end area land area acres units free spa legal disbursement free loan legal stamp duty tier security full facilities luxury lifestyle easy access highway silk duke ekve min kl center min …	tell bailey tan saw ad durianproperti get best deal brand new ampang land properti hurri contact whatsapp bailey tan view inform green eco environ forest front mountain area low densiti super high end area land area acr unit free spa legal disburs free loan legal stamp duti tier secur full facil luxuri lifestyl easi access highway silk duke ekv min kl center min ampang point min melawati mall jus…	['tell', 'bailey', 'tan', 'saw', 'ad', 'durianproperti', 'get', 'best', 'deal', 'brand', 'new', 'ampang', 'land', 'properti', 'hurri', 'contact', 'whatsapp', 'bailey', 'tan', 'view', 'inform', 'green', 'eco', 'environ', 'forest', 'front', 'mountain', 'area', 'low', 'densiti', 'super', 'high', 'end', 'area', 'land', 'area', 'acr', 'unit', 'free', 'spa', 'legal', 'disburs', 'free', 'loan', 'legal',…	0	notfake	301099011762810.jpg	301099011762810	301099011762810.jpg	FAKE	1	301099011762810.jpg	jpg
3250	0	3278	459096	840	2	0	2	0	2	Tell KEVIN LEE you saw this ad from DurianProperty to get best deal.Emerald Hills in Alam Damai, Cheras, Kuala Lumpur For Sale OFFICIAL LAUNCHING! *Mystery Packages:Low Down Payment (Call For Details)* -Type C 840sf--2 Bedroom 2 Bathroom -RM5000 Booking Fee -5% Bumi Discount -S&P Legal & LOAN AGREEMENT Legal Fee Absorb by developer -FREE LOAN STAMP DUTY -FREE 2 Car Park Emerald Hills in Alam Dama…	Emerald Hills	Alam Damai	0	0	Emerald Hills, Alam Damai	3.06007	101.741	0	0	https://cdn.durianproperty.com.my/images/classified_ads/279377510508355.jpg	tell kevin lee saw ad durianproperty get best deal emerald hills alam damai cheras kuala lumpur sale official launching mystery packages low payment call details type c sf bedroom bathroom rm booking fee bumi discount p legal loan agreement legal fee absorb developer free loan stamp duty free car park emerald hills alam damai cheras kuala lumpur unit type type sf bedroom bathroom type a private g…	tell kevin lee saw ad durianproperti get best deal emerald hill alam damai chera kuala lumpur sale offici launch mysteri packag low payment call detail type c sf bedroom bathroom rm book fee bumi discount p legal loan agreement legal fee absorb develop free loan stamp duti free car park emerald hill alam damai chera kuala lumpur unit type type sf bedroom bathroom type a privat garden sf sf bedroo…	['tell', 'kevin', 'lee', 'saw', 'ad', 'durianproperti', 'get', 'best', 'deal', 'emerald', 'hill', 'alam', 'damai', 'chera', 'kuala', 'lumpur', 'sale', 'offici', 'launch', 'mysteri', 'packag', 'low', 'payment', 'call', 'detail', 'type', 'c', 'sf', 'bedroom', 'bathroom', 'rm', 'book', 'fee', 'bumi', 'discount', 'p', 'legal', 'loan', 'agreement', 'legal', 'fee', 'absorb', 'develop', 'free', 'loan', …	0	notfake	279377510508355.jpg	279377510508355	279377510508355.jpg	FAKE	1	279377510508355.jpg	jpg
3269	0	3297	4200000	7000	5	1	7	0	4	Tell sc sam you saw this ad from DurianProperty to get best deal.Bungalow Located at Perdana Lakeview East, Cyberjaya Details: Land Size : 10,000 sqft Built-Up Area: 7000 sqft Bedroom: 7 (attached with toilet) Bathroom: 9 Tenure - freehold Furnishing - Furnished with wardrobe, kitchen cabinet, lights, fans, air-cons Price - RM 4,200,000 Facilities - observation room facing the lake view, swimming…	Perdana Lakeview East	Cyberjaya	0	3	Perdana Lakeview East, Cyberjaya	2.91688	101.669	0	0	https://cdn.durianproperty.com.my/images/classified_ads/305138512046645.jpeg	tell sc sam saw ad durianproperty get best deal bungalow located perdana lakeview east cyberjaya details land size sqft built area sqft bedroom attached toilet bathroom tenure freehold furnishing furnished wardrobe kitchen cabinet lights fans air cons price rm facilities observation room facing lake view swimming pool bbq place second floor laundry room storerooms balcony facing garden lake view …	tell sc sam saw ad durianproperti get best deal bungalow locat perdana lakeview east cyberjaya detail land size sqft built area sqft bedroom attach toilet bathroom tenur freehold furnish furnish wardrob kitchen cabinet light fan air con price rm facil observ room face lake view swim pool bbq place second floor laundri room storeroom balconi face garden lake view hr secur gate pleas call whatsapp …	['tell', 'sc', 'sam', 'saw', 'ad', 'durianproperti', 'get', 'best', 'deal', 'bungalow', 'locat', 'perdana', 'lakeview', 'east', 'cyberjaya', 'detail', 'land', 'size', 'sqft', 'built', 'area', 'sqft', 'bedroom', 'attach', 'toilet', 'bathroom', 'tenur', 'freehold', 'furnish', 'furnish', 'wardrob', 'kitchen', 'cabinet', 'light', 'fan', 'air', 'con', 'price', 'rm', 'facil', 'observ', 'room', 'face', …	0	notfake	305138512046645.jpeg	305138512046645	305138512046645.jpeg	FAKE	1	305138512046645.jpeg	jpeg
3277	0	3305	699990	500	1	2	2	0	3	Genting Highlands New Project !!! Call Alvin Lau @ 011-33331433 *** Genting New Project @ Freehold *** - 0% Downpayment - Rental Return from RM2,600-Rm9,500 - Near to Genting Theme Park - Shuttle Bus service provided. - Fully-Furnished with Luxury Interior Design - FREE ALL LAWYER FEES ( Pictures shown might not from the actual unit, it is for illustration purpose only ) SHOWROOM IS READY FOR VIE…	Grand Ion Majestic	Genting Highlands	8	0	Grand Ion Majestic, Genting Highlands	3.43158	101.79	0	1	https://cdn.durianproperty.com.my/images/classified_ads/299818011678097.jpg	genting highlands new project call alvin lau genting new project freehold downpayment rental return rm rm near genting theme park shuttle bus service provided fully furnished luxury interior design free lawyer fees pictures shown might actual unit illustration purpose showroom ready viewing appreciate view appointment personalized presentation please contact would pleasure serve please call sms w…	gent highland new project call alvin lau gent new project freehold downpay rental return rm rm near gent theme park shuttl bu servic provid fulli furnish luxuri interior design free lawyer fee pictur shown might actual unit illustr purpos showroom readi view appreci view appoint person present pleas contact would pleasur serv pleas call sm whatsapp alvin lau alvin lau you may view grand ion majes…	['gent', 'highland', 'new', 'project', 'call', 'alvin', 'lau', 'gent', 'new', 'project', 'freehold', 'downpay', 'rental', 'return', 'rm', 'rm', 'near', 'gent', 'theme', 'park', 'shuttl', 'bu', 'servic', 'provid', 'fulli', 'furnish', 'luxuri', 'interior', 'design', 'free', 'lawyer', 'fee', 'pictur', 'shown', 'might', 'actual', 'unit', 'illustr', 'purpos', 'showroom', 'readi', 'view', 'appreci', 'v…	1	fake	299818011678097.jpg	299818011678097	299818011678097.jpg	FAKE	1	299818011678097.jpg	jpg
3333	0	3362	680000	2613	4	0	5	0	4	Tell Vivian Poh you saw this ad from DurianProperty to get best deal.New Launching Double Storey Terrace House (Eco Friendly Environment | Close to Bandar Sri Damansara ) Best Deal In town Landed Property CORNER | INTERMEDIATE | ENDLOT ( Available now) Individual Title Clubhouse Facalities 50- Acer Central Park Showroom is ready to visit Hurry Up Make Appointment : - AAA Estate Agents Sdn. Bhd. (…	Bandar Seri Coalfields	Sungai Buloh	0	1	Bandar Seri Coalfields, Sungai Buloh	3.24087	101.48	0	0	https://cdn.durianproperty.com.my/images/classified_ads/303798711953585.jpg	tell vivian poh saw ad durianproperty get best deal new launching double storey terrace house eco friendly environment close bandar sri damansara best deal town landed property corner intermediate endlot available individual title clubhouse facalities acer central park showroom ready visit hurry make appointment estate agents sdn bhd e may view bandar seri coalfields profile	tell vivian poh saw ad durianproperti get best deal new launch doubl storey terrac hous eco friendli environ close bandar sri damansara best deal town land properti corner intermedi endlot avail individu titl clubhous facal acer central park showroom readi visit hurri make appoint estat agent sdn bhd e may view bandar seri coalfield profil	['tell', 'vivian', 'poh', 'saw', 'ad', 'durianproperti', 'get', 'best', 'deal', 'new', 'launch', 'doubl', 'storey', 'terrac', 'hous', 'eco', 'friendli', 'environ', 'close', 'bandar', 'sri', 'damansara', 'best', 'deal', 'town', 'land', 'properti', 'corner', 'intermedi', 'endlot', 'avail', 'individu', 'titl', 'clubhous', 'facal', 'acer', 'central', 'park', 'showroom', 'readi', 'visit', 'hurri', 'ma…	0	notfake	303798711953585.jpg	303798711953585	303798711953585.jpg	FAKE	1	303798711953585.jpg	jpg
3374	0	3403	424000	980	2	2	3	0	2	Tell kamal AG you saw this ad from DurianProperty to get best deal.The Service Apartment @ Sierra Perdana Johor BOOKING RM3000 SAHAJA !! CASH BACK RM30,000 !! FULLY FURNITURE !! FULL LOAN !! 10% REBATE # Percuma 2 Car Park # Percuma SPA & Lawyer fees # Percuma Stamp duty on loan # Percuma 365days Maintenance Fee Direct Access:- ~ EDL TO CIQ Great Location:- ! 2KM Aeon Mall Permas Jaya ! 5KM KPJ S…	Taman Sierra Perdana	Masai	2	0	Taman Sierra Perdana, Masai	1.48169	103.867	0	0	https://cdn.durianproperty.com.my/images/classified_ads/293634011262658.jpg	tell kamal ag saw ad durianproperty get best deal service apartment sierra perdana johor booking rm sahaja cash back rm fully furniture full loan rebate percuma car park percuma spa lawyer fees percuma stamp duty loan percuma days maintenance fee direct access edl ciq great location km aeon mall permas jaya km kpj specialised hospital penawar km ksl shooping mall hotel sogo midvalley km aeon mall…	tell kamal ag saw ad durianproperti get best deal servic apart sierra perdana johor book rm sahaja cash back rm fulli furnitur full loan rebat percuma car park percuma spa lawyer fee percuma stamp duti loan percuma day mainten fee direct access edl ciq great locat km aeon mall perma jaya km kpj specialis hospit penawar km ksl shoop mall hotel sogo midvalley km aeon mall tebrau tesco tebrau ikea t…	['tell', 'kamal', 'ag', 'saw', 'ad', 'durianproperti', 'get', 'best', 'deal', 'servic', 'apart', 'sierra', 'perdana', 'johor', 'book', 'rm', 'sahaja', 'cash', 'back', 'rm', 'fulli', 'furnitur', 'full', 'loan', 'rebat', 'percuma', 'car', 'park', 'percuma', 'spa', 'lawyer', 'fee', 'percuma', 'stamp', 'duti', 'loan', 'percuma', 'day', 'mainten', 'fee', 'direct', 'access', 'edl', 'ciq', 'great', 'loc…	0	notfake	293634011262658.jpg	293634011262658	293634011262658.jpg	FAKE	1	293634011262658.jpg	jpg
3422	0	3452	550000	900	2	2	3	1	2	Tell Mew Hew you saw this ad from DurianProperty to get best deal.Sungai Besi Unit Fully Furnished 150k Cash Out 0% Down Payment Property Fully Furnished Unit Must View!!!!!! # 0% Down Payment!!!!!! # FREE SPA & Loan Legal Fees # FREE SPA & Loan Stamp Duty # Fully Furnished #Cash On Hand RM150k+ Facilities: * Infinity Swimming Pool * Reflective Pool * Multi-Purpose Hall * Squash * Sauna * Kinderg…	Seri Kembangan	Selangor	0	0	Seri Kembangan, Selangor	3.022	101.706	0	0	https://cdn.durianproperty.com.my/images/classified_ads/301987811826771.jpg	tell mew hew saw ad durianproperty get best deal sungai besi unit fully furnished k cash payment property fully furnished unit must view payment free spa loan legal fees free spa loan stamp duty fully furnished cash hand rmk facilities infinity swimming pool reflective pool multi purpose hall squash sauna kindergarten children playground sky glass gym sky dining bbq pit accessibility easy accessi…	tell mew hew saw ad durianproperti get best deal sungai besi unit fulli furnish k cash payment properti fulli furnish unit must view payment free spa loan legal fee free spa loan stamp duti fulli furnish cash hand rmk facil infin swim pool reflect pool multi purpos hall squash sauna kindergarten children playground sky glass gym sky dine bbq pit access easi access kindli contact view detail h p c…	['tell', 'mew', 'hew', 'saw', 'ad', 'durianproperti', 'get', 'best', 'deal', 'sungai', 'besi', 'unit', 'fulli', 'furnish', 'k', 'cash', 'payment', 'properti', 'fulli', 'furnish', 'unit', 'must', 'view', 'payment', 'free', 'spa', 'loan', 'legal', 'fee', 'free', 'spa', 'loan', 'stamp', 'duti', 'fulli', 'furnish', 'cash', 'hand', 'rmk', 'facil', 'infin', 'swim', 'pool', 'reflect', 'pool', 'multi', '…	0	notfake	301987811826771.jpg	301987811826771	301987811826771.jpg	FAKE	1	301987811826771.jpg	jpg
3506	0	3536	350000	1100	3	0	5	1	2	Tell Lynda hashim you saw this ad from DurianProperty to get best deal.Limited units onlyYou may view Bandar Seri Astana Profile here.	Bandar Seri Astana	Sungai Petani	6	1	Bandar Seri Astana, Sungai Petani	5.59199	100.543	0	0	https://cdn.durianproperty.com.my/images/classified_ads/304055311969547.jpeg	tell lynda hashim saw ad durianproperty get best deal limited units onlyyou may view bandar seri astana profile	tell lynda hashim saw ad durianproperti get best deal limit unit onlyy may view bandar seri astana profil	['tell', 'lynda', 'hashim', 'saw', 'ad', 'durianproperti', 'get', 'best', 'deal', 'limit', 'unit', 'onlyy', 'may', 'view', 'bandar', 'seri', 'astana', 'profil']	0	notfake	304055311969547.jpeg	304055311969547	304055311969547.jpeg	FAKE	1	304055311969547.jpeg	jpeg
3516	0	3546	650000	1050	2	2	3	0	1	Tell Anna Koay you saw this ad from DurianProperty to get best deal.Best Buy & Good Investment. Easy reaching distance to the beach and hotels along the coastal region. Just a short driving distance to Tenby, Dalat and Upland International Schools. Also, there are shopping malls along Tanjung Tokong, such as Island Plaza and Tesco, with Gurney Plaza and Gurney Paragon along Gurney Drive (tourist …	Miami Green	Batu Ferringhi	4	0	Miami Green, Batu Ferringhi	5.47592	100.269	0	1	https://cdn.durianproperty.com.my/images/classified_ads/300258711704513.jpg	tell anna koay saw ad durianproperty get best deal best buy good investment easy reaching distance beach hotels along coastal region short driving distance tenby dalat upland international schools also shopping malls along tanjung tokong island plaza tesco gurney plaza gurney paragon along gurney drive tourist spot minutes driving distance place ideal retirement family stay environment favorable …	tell anna koay saw ad durianproperti get best deal best buy good invest easi reach distanc beach hotel along coastal region short drive distanc tenbi dalat upland intern school also shop mall along tanjung tokong island plaza tesco gurney plaza gurney paragon along gurney drive tourist spot minut drive distanc place ideal retir famili stay environ favor singl live also ideal holiday home wish rel…	['tell', 'anna', 'koay', 'saw', 'ad', 'durianproperti', 'get', 'best', 'deal', 'best', 'buy', 'good', 'invest', 'easi', 'reach', 'distanc', 'beach', 'hotel', 'along', 'coastal', 'region', 'short', 'drive', 'distanc', 'tenbi', 'dalat', 'upland', 'intern', 'school', 'also', 'shop', 'mall', 'along', 'tanjung', 'tokong', 'island', 'plaza', 'tesco', 'gurney', 'plaza', 'gurney', 'paragon', 'along', 'gu…	0	notfake	300258711704513.jpg	300258711704513	300258711704513.jpg	FAKE	1	300258711704513.jpg	jpg
3599	0	3629	265000	450	1	1	0	0	1	Tell Ivy Yew you saw this ad from DurianProperty to get best deal.Best Location Condo for sale. Location in heart of Cyberjaya. It just beside Taman Tasik Cyberjaya and near to Masjid Raja Haji Fisabilillah. It is a Freehold commercial land. It convenience of having retail and education components within this area. Tenure : Free Hold Built Up : 450sf and 790sf Expected date of completion : 2023 S…	Edusphere	Cyberjaya	7	6	Edusphere, Cyberjaya	2.93077	101.638	0	0	https://cdn.durianproperty.com.my/images/classified_ads/294640911330565.png	tell ivy yew saw ad durianproperty get best deal best location condo sale location heart cyberjaya beside taman tasik cyberjaya near masjid raja haji fisabilillah freehold commercial land convenience retail education components within area tenure free hold built sf sf expected date completion studio sf car park dual key bedroom sf car park amenities education institution mmu lim kok wing universi…	tell ivi yew saw ad durianproperti get best deal best locat condo sale locat heart cyberjaya besid taman tasik cyberjaya near masjid raja haji fisabilillah freehold commerci land conveni retail educ compon within area tenur free hold built sf sf expect date complet studio sf car park dual key bedroom sf car park amen educ institut mmu lim kok wing univers cucm cyberjaya univers colleg elc intern …	['tell', 'ivi', 'yew', 'saw', 'ad', 'durianproperti', 'get', 'best', 'deal', 'best', 'locat', 'condo', 'sale', 'locat', 'heart', 'cyberjaya', 'besid', 'taman', 'tasik', 'cyberjaya', 'near', 'masjid', 'raja', 'haji', 'fisabilillah', 'freehold', 'commerci', 'land', 'conveni', 'retail', 'educ', 'compon', 'within', 'area', 'tenur', 'free', 'hold', 'built', 'sf', 'sf', 'expect', 'date', 'complet', 'st…	0	notfake	294640911330565.png	294640911330565	294640911330565.png	FAKE	1	294640911330565.png	png
3615	0	3645	398000	1334	2	0	4	1	2	You may view Taman Bentara Profile here.	Taman Bentara	Telok Panglima Garang	0	1	Taman Bentara, Telok Panglima Garang	2.9355	101.501	0	0	https://cdn.durianproperty.com.my/images/classified_ads/305031012039019.png	may view taman bentara profile	may view taman bentara profil	['may', 'view', 'taman', 'bentara', 'profil']	0	notfake	305031012039019.png	305031012039019	305031012039019.png	FAKE	1	305031012039019.png	png
3626	0	3657	380000	2000	3	0	4	0	3	You may view Bandar Mahkota Banting Profile here.	Bandar Mahkota Banting	Banting	0	1	Bandar Mahkota Banting, Banting	2.83103	101.552	2	0	https://cdn.durianproperty.com.my/images/classified_ads/305162612048632.PNG	may view bandar mahkota banting profile	may view bandar mahkota bant profil	['may', 'view', 'bandar', 'mahkota', 'bant', 'profil']	0	notfake	305162612048632.PNG	305162612048632	305162612048632.PNG	FAKE	1	305162612048632.PNG	PNG
3663	0	3694	810000	1550	2	1	4	0	3	Tell Andy Gan you saw this ad from DurianProperty to get best deal.Mont Kiara Angkupuri For Sale/Rent. - Built up: 1,550 . - 3+1 bedrooms with 2 bathrooms - Newly refurbish and tastefully fully furnished - Strategic located in a quiet and serene township - Next to Mont Kiara International School & short drive to Garden International School - 1 covered car-park - 24-hour tight security with smart …	Angkupuri	Mont Kiara	0	0	Angkupuri, Mont Kiara	3.17023	101.652	0	0	https://cdn.durianproperty.com.my/images/classified_ads/301063111760113.jpg	tell andy gan saw ad durianproperty get best deal mont kiara angkupuri sale rent built bedrooms bathrooms newly refurbish tastefully fully furnished strategic located quiet serene township next mont kiara international school short drive garden international school covered car park hour tight security smart card access system cctv nearby amenities include one mont kiara desa sri hartamas plaza da…	tell andi gan saw ad durianproperti get best deal mont kiara angkupuri sale rent built bedroom bathroom newli refurbish tast fulli furnish strateg locat quiet seren township next mont kiara intern school short drive garden intern school cover car park hour tight secur smart card access system cctv nearbi amen includ one mont kiara desa sri hartama plaza dama publika solari mont kiara solari dutam…	['tell', 'andi', 'gan', 'saw', 'ad', 'durianproperti', 'get', 'best', 'deal', 'mont', 'kiara', 'angkupuri', 'sale', 'rent', 'built', 'bedroom', 'bathroom', 'newli', 'refurbish', 'tast', 'fulli', 'furnish', 'strateg', 'locat', 'quiet', 'seren', 'township', 'next', 'mont', 'kiara', 'intern', 'school', 'short', 'drive', 'garden', 'intern', 'school', 'cover', 'car', 'park', 'hour', 'tight', 'secur', …	0	notfake	301063111760113.jpg	301063111760113	301063111760113.jpg	FAKE	1	301063111760113.jpg	jpg
3769	0	3800	543400	1730	3	0	4	0	3	Tell Raduan Jemain you saw this ad from DurianProperty to get best deal.Freehold Bandar Baru Salak Tinggi Rumah Teres 2 Tingkat Pra-Pelancaran: Booking RM1000 Bulanan Loan RM1,850* From RM490k* Built up: 1773 sqft Lot Size: 20'x65' Bedrooms: 4 Bathrooms: 3 Estimated completion Q4 2022 Promotion Package - Limited Time Bumi offer Non Bumi offer 100:% Full Loan 0% Zero Downpayment Pinjaman kerajaan …	Greenwoods Salak Perdana	Sepang	0	1	Greenwoods Salak Perdana, Sepang	2.8388	101.726	0	0	https://cdn.durianproperty.com.my/images/classified_ads/300505911721870.jpg	tell raduan jemain saw ad durianproperty get best deal freehold bandar baru salak tinggi terrace house levels pre launch booking rm monthly loan rm rmk built sqft lot size x bedrooms bathrooms estimated completion q promotion package limited time bumi offer non bumi offer full loan zero downpayment royal loan provided lppsa free spa legal fees disbursement free loan legal fees stamp duty disburse…	tell raduan jemain saw ad durianproperti get best deal freehold bandar baru salak tinggi terrac hous level pre launch book rm monthli loan rm rmk built sqft lot size x bedroom bathroom estim complet q promot packag limit time bumi offer non bumi offer full loan zero downpay royal loan provid lppsa free spa legal fee disburs free loan legal fee stamp duti disburs free mot legal fee stamp duti disb…	['tell', 'raduan', 'jemain', 'saw', 'ad', 'durianproperti', 'get', 'best', 'deal', 'freehold', 'bandar', 'baru', 'salak', 'tinggi', 'terrac', 'hous', 'level', 'pre', 'launch', 'book', 'rm', 'monthli', 'loan', 'rm', 'rmk', 'built', 'sqft', 'lot', 'size', 'x', 'bedroom', 'bathroom', 'estim', 'complet', 'q', 'promot', 'packag', 'limit', 'time', 'bumi', 'offer', 'non', 'bumi', 'offer', 'full', 'loan'…	0	notfake	300505911721870.jpg	300505911721870	300505911721870.jpg	FAKE	1	300505911721870.jpg	jpg
3770	0	3801	561000	888	2	1	3	0	3	Tell kamal AG you saw this ad from DurianProperty to get best deal.GM Remia Residence @ Bandar Botanic ------------------------------------------------------------------------------ DETAILS UNIT (Freehold) Built-ups: 888 sqft 3 Bedroom + 2 Bathroom Number of Block: 1 Number units per floor: 9 units Front Roof top extend Back yard fully extend ------------------------------------------------------…	Residence Remia	Klang	0	0	Residence Remia, Klang	2.98931	101.454	0	0	https://cdn.durianproperty.com.my/images/classified_ads/295051811354672.jpg	tell kamal ag saw ad durianproperty get best deal gm remia residence bandar botanic details unit freehold built ups sqft bedroom bathroom number block number units per floor units front roof top extend back yard fully extend price starting rm k legal fees spa disbursement legal fees loan disbursement stamp duty loan kitchen cabinet hob hood carparks facilities swimming pool gymnasium barbecue pit…	tell kamal ag saw ad durianproperti get best deal gm remia resid bandar botan detail unit freehold built up sqft bedroom bathroom number block number unit per floor unit front roof top extend back yard fulli extend price start rm k legal fee spa disburs legal fee loan disburs stamp duti loan kitchen cabinet hob hood carpark facil swim pool gymnasium barbecu pit jog track meet room develop easili …	['tell', 'kamal', 'ag', 'saw', 'ad', 'durianproperti', 'get', 'best', 'deal', 'gm', 'remia', 'resid', 'bandar', 'botan', 'detail', 'unit', 'freehold', 'built', 'up', 'sqft', 'bedroom', 'bathroom', 'number', 'block', 'number', 'unit', 'per', 'floor', 'unit', 'front', 'roof', 'top', 'extend', 'back', 'yard', 'fulli', 'extend', 'price', 'start', 'rm', 'k', 'legal', 'fee', 'spa', 'disburs', 'legal', …	0	notfake	295051811354672.jpg	295051811354672	295051811354672.jpg	FAKE	1	295051811354672.jpg	jpg
3778	0	3809	672000	2261	3	0	5	0	2	Tell Lydia Cathrina you saw this ad from DurianProperty to get best deal.>DEPOSIT RM500 ONLY >FULL LOAN -->2 Storey Superlink Villa 24‚Äô x 75SPECIAL Packages: (Limited Time Only) - FREE STAMP DUTY for MOT (H.O.C Promotion till 31st May 2021) - FREE Legal Fees on SPA & Loan Agreement - 20% REBATE FOR ALL + RM20k Additional Rebate (1st come 1st serve) >Price from RM 672,000** ~UNIQUE SELLING POINT…	Aman Putri	Shah Alam	0	2	Aman Putri, Shah Alam	3.21549	101.522	0	0	https://cdn.durianproperty.com.my/images/classified_ads/294566311322945.jpg	tell lydia cathrina saw ad durianproperty get best deal deposit rm full loan storey superlink villa x special packages limited time free stamp duty mot h c promotion till st may free legal fees spa loan agreement rebate rmk additional rebate st come st serve price rm unique selling points feeder bus mrt station near kwasa land rrim future development acres epf established booming location great a…	tell lydia cathrina saw ad durianproperti get best deal deposit rm full loan storey superlink villa x special packag limit time free stamp duti mot h c promot till st may free legal fee spa loan agreement rebat rmk addit rebat st come st serv price rm uniqu sell point feeder bu mrt station near kwasa land rrim futur develop acr epf establish boom locat great access eg ldp north south highway guth…	['tell', 'lydia', 'cathrina', 'saw', 'ad', 'durianproperti', 'get', 'best', 'deal', 'deposit', 'rm', 'full', 'loan', 'storey', 'superlink', 'villa', 'x', 'special', 'packag', 'limit', 'time', 'free', 'stamp', 'duti', 'mot', 'h', 'c', 'promot', 'till', 'st', 'may', 'free', 'legal', 'fee', 'spa', 'loan', 'agreement', 'rebat', 'rmk', 'addit', 'rebat', 'st', 'come', 'st', 'serv', 'price', 'rm', 'uniq…	0	notfake	294566311322945.jpg	294566311322945	294566311322945.jpg	FAKE	1	294566311322945.jpg	jpg
3795	0	3826	298000	700	1	0	3	0	1	Tell Bryan Goh you saw this ad from DurianProperty to get best deal.* Opposite PBA office * Close proximity to SJK(C)Shang Wu Primary School, SK Saint Xavier, SJK Chung Hwa Confucian, SJK(C) Han Chiang, Han Chiang Independent High School, Han Chiang University College of Communication, Penang Digital Library, Penang Turf Club, Penang General Hospital * Low density * Ground floor * Partly renovate…	Taman Padang Tembak 3	Georgetown	4	0	Taman Padang Tembak 3, Georgetown	5.41063	100.291	0	0	https://cdn.durianproperty.com.my/images/classified_ads/302208511842696.jpg	tell bryan goh saw ad durianproperty get best deal opposite pba office close proximity sjk c shang wu primary school sk saint xavier sjk chung hwa confucian sjk c han chiang han chiang independent high school han chiang university college communication penang digital library penang turf club penang general hospital low density ground floor partly renovated kitchen cabinet sf bedrooms bathroom car…	tell bryan goh saw ad durianproperti get best deal opposit pba offic close proxim sjk c shang wu primari school sk saint xavier sjk chung hwa confucian sjk c han chiang han chiang independ high school han chiang univers colleg commun penang digit librari penang turf club penang gener hospit low densiti ground floor partli renov kitchen cabinet sf bedroom bathroom carpark pleas contact bryan goh w…	['tell', 'bryan', 'goh', 'saw', 'ad', 'durianproperti', 'get', 'best', 'deal', 'opposit', 'pba', 'offic', 'close', 'proxim', 'sjk', 'c', 'shang', 'wu', 'primari', 'school', 'sk', 'saint', 'xavier', 'sjk', 'chung', 'hwa', 'confucian', 'sjk', 'c', 'han', 'chiang', 'han', 'chiang', 'independ', 'high', 'school', 'han', 'chiang', 'univers', 'colleg', 'commun', 'penang', 'digit', 'librari', 'penang', '…	0	notfake	302208511842696.jpg	302208511842696	302208511842696.jpg	FAKE	1	302208511842696.jpg	jpg
3796	0	3827	2000000	1465	2	2	3	0	3	Tell Ms Lim you saw this ad from DurianProperty to get best deal.Tropika Ferringhi, Batu Ferringhi, Penang Project Details :You may view Penang Profile here.	Penang	Malaysia	4	0	Penang, Malaysia	5.41413	100.329	0	0	https://cdn.durianproperty.com.my/images/classified_ads/303591111938662.JPG	tell ms lim saw ad durianproperty get best deal tropika ferringhi batu ferringhi penang project details may view penang profile	tell ms lim saw ad durianproperti get best deal tropika ferringhi batu ferringhi penang project detail may view penang profil	['tell', 'ms', 'lim', 'saw', 'ad', 'durianproperti', 'get', 'best', 'deal', 'tropika', 'ferringhi', 'batu', 'ferringhi', 'penang', 'project', 'detail', 'may', 'view', 'penang', 'profil']	0	notfake	303591111938662.JPG	303591111938662	303591111938662.JPG	FAKE	1	303591111938662.JPG	JPG
3816	0	3848	295000	1000	2	2	3	0	2	You may view Kajang 2 Profile here.	Kajang 2	Kajang	0	0	Kajang 2, Kajang	2.96668	101.797	0	1	https://cdn.durianproperty.com.my/images/classified_ads/300844011747409.jpeg	may view kajang profile	may view kajang profil	['may', 'view', 'kajang', 'profil']	0	notfake	300844011747409.jpeg	300844011747409	300844011747409.jpeg	FAKE	1	300844011747409.jpeg	jpeg
3819	0	3851	369000	2500	3	1	5	0	2	You may view Bandar Baru Nilai Profile here.	Bandar Baru Nilai	Nilai	3	1	Bandar Baru Nilai, Nilai	2.82133	101.778	0	0	https://cdn.durianproperty.com.my/images/classified_ads/302627011874654.jpg	may view bandar baru nilai profile	may view bandar baru nilai profil	['may', 'view', 'bandar', 'baru', 'nilai', 'profil']	0	notfake	302627011874654.jpg	302627011874654	302627011874654.jpg	FAKE	1	302627011874654.jpg	jpg
3831	0	3863	680000	999	2	2	2	0	1	Tell Sam Wong you saw this ad from DurianProperty to get best deal.The Capers @ Sentul East unit for srent URGENTLY Unit Details: Size: 999sf Room: 2+1 bedrooms, 3 bathrooms and 1 car park Furnish: Fully Title: FreeHold Bumi Lot : Non Bumi lot Occupancy : Vacant Floor Level: Low Floor Level Facing : To Greenery Garden and swimming pool view, relax and chill Contact for more information and viewin…	The Capers	Sentul	1	0	The Capers, Sentul	3.18119	101.694	0	0	https://cdn.durianproperty.com.my/images/classified_ads/301990511826935.jpg	tell sam wong saw ad durianproperty get best deal capers sentul east unit srent urgently unit details size sf room bedrooms bathrooms car park furnish fully title freehold bumi lot non bumi lot occupancy vacant floor level low floor level facing greenery garden swimming pool view relax chill contact information viewing nice day wong yoong shen negotiator dreamvest realty many units available low …	tell sam wong saw ad durianproperti get best deal caper sentul east unit srent urgent unit detail size sf room bedroom bathroom car park furnish fulli titl freehold bumi lot non bumi lot occup vacant floor level low floor level face greeneri garden swim pool view relax chill contact inform view nice day wong yoong shen negoti dreamvest realti mani unit avail low floor middl floor high floor basic…	['tell', 'sam', 'wong', 'saw', 'ad', 'durianproperti', 'get', 'best', 'deal', 'caper', 'sentul', 'east', 'unit', 'srent', 'urgent', 'unit', 'detail', 'size', 'sf', 'room', 'bedroom', 'bathroom', 'car', 'park', 'furnish', 'fulli', 'titl', 'freehold', 'bumi', 'lot', 'non', 'bumi', 'lot', 'occup', 'vacant', 'floor', 'level', 'low', 'floor', 'level', 'face', 'greeneri', 'garden', 'swim', 'pool', 'vie…	1	fake	301990511826935.jpg	301990511826935	301990511826935.jpg	FAKE	1	301990511826935.jpg	jpg
3850	0	3883	540000	1519	3	0	4	0	2	Tell Syaiful Akhwan you saw this ad from DurianProperty to get best deal.NEW HOUSE ELSA BANDAR BUKIT RAJA FOR SALE RM540K 4 bedroom and 3 Toilet Freehold unit basic unit 1300sqft (20ft x65ft) School: 1)Smk Taman Klang Utama 1.29km 2)3Q MRC Junior Setia Alam (Kindergarten) 3.1km 3)SMK Rantau Panjang 3.12km 4)Sekolah Kebangsaan Rantau Panjang 3.28km 5)Sekolah Kebangsaan Batu Belah 3.54km 6)Eduwis B…	Bandar Bukit Raja	Klang	0	1	Bandar Bukit Raja, Klang	3.08745	101.433	0	0	https://cdn.durianproperty.com.my/images/classified_ads/302893911892396.jpeg	tell syaiful akhwan saw ad durianproperty get best deal new house elsa bandar bukit raja sale rmk bedroom toilet freehold unit basic unit sqft ft xft school high school taman klang utama km q mrc junior setia alam kindergarten km smk rantau panjang km national school rantau panjang km national school batu belah km eduwis batu belah klang km smk setia alam km sekolah kebangsaan sungai kapar indah …	tell syaiful akhwan saw ad durianproperti get best deal new hous elsa bandar bukit raja sale rmk bedroom toilet freehold unit basic unit sqft ft xft school high school taman klang utama km q mrc junior setia alam kindergarten km smk rantau panjang km nation school rantau panjang km nation school batu belah km eduwi batu belah klang km smk setia alam km sekolah kebangsaan sungai kapar indah km smk…	['tell', 'syaiful', 'akhwan', 'saw', 'ad', 'durianproperti', 'get', 'best', 'deal', 'new', 'hous', 'elsa', 'bandar', 'bukit', 'raja', 'sale', 'rmk', 'bedroom', 'toilet', 'freehold', 'unit', 'basic', 'unit', 'sqft', 'ft', 'xft', 'school', 'high', 'school', 'taman', 'klang', 'utama', 'km', 'q', 'mrc', 'junior', 'setia', 'alam', 'kindergarten', 'km', 'smk', 'rantau', 'panjang', 'km', 'nation', 'scho…	0	notfake	302893911892396.jpeg	302893911892396	302893911892396.jpeg	FAKE	1	302893911892396.jpeg	jpeg
3864	0	3897	567000	1730	3	0	4	0	2	Rumah Baru 2 Tingkat @ Hulu Langat Fasa 2 Dibuka Untuk Jualan Rizab Melayu & Hakmilik Kekal Land Size : 20‚Äôx 60‚Äô Built up : 1730 sqft 4 Bilik tidur 3 Bilik air Harga Dari Rm 5xxk 0% Downpayment Booking Rm3k Free SPA legal fees Free Loan legal fees Free M.O.T Amenities:- - Mydin, 99 Speedmart, KK Mart - Pizza Hut, Subway, Secret Receipe - Sekolah, Pos Malaysia, Pusat Kesihatan - Petronas Stati…	Kampung Batu 14	Hulu Langat	0	1	Kampung Batu 14, Hulu Langat	3.12394	101.819	0	0	https://cdn.durianproperty.com.my/images/classified_ads/299640311666545.jpg	new storey house hulu langat phase open sale malay reserve permanent title land size x built sqft bedrooms bathrooms price rm xxk downpayment booking rmk free spa legal fees free loan legal fees free amenities mydin speedmart okay mart pizza hut subway secret receipe school pos malaysia health center petronas station mosque police station accessibility cheras highway kajang highway ekve lebuhraya…	new storey hous hulu langat phase open sale malay reserv perman titl land size x built sqft bedroom bathroom price rm xxk downpay book rmk free spa legal fee free loan legal fee free amen mydin speedmart okay mart pizza hut subway secret receip school po malaysia health center petrona station mosqu polic station access chera highway kajang highway ekv lebuhraya suke ampang rapidkl lrt station mrt…	['new', 'storey', 'hous', 'hulu', 'langat', 'phase', 'open', 'sale', 'malay', 'reserv', 'perman', 'titl', 'land', 'size', 'x', 'built', 'sqft', 'bedroom', 'bathroom', 'price', 'rm', 'xxk', 'downpay', 'book', 'rmk', 'free', 'spa', 'legal', 'fee', 'free', 'loan', 'legal', 'fee', 'free', 'amen', 'mydin', 'speedmart', 'okay', 'mart', 'pizza', 'hut', 'subway', 'secret', 'receip', 'school', 'po', 'mala…	0	notfake	299640311666545.jpg	299640311666545	299640311666545.jpg	FAKE	1	299640311666545.jpg	jpg
3865	0	3898	1843200	1152	3	0	3	1	3	Tell Tiffany Tang you saw this ad from DurianProperty to get best deal.We focus on Commercial Space such as Grade A and MSC (Office and Retail Leasing) and our areas include KLCC, CBD, KL City, PJ and other parts of Klang Valley. Feel free to contact Tiffany (REN 09427) @ +6012 224 8866 (Whatsapp) or g@ for inquiries and office space proposals. ABOUT ASPIRE TOWER @ KL ECO CITY -------------------…	KL Eco City	Kuala Lumpur	1	6	KL Eco City, Kuala Lumpur	3.11796	101.674	0	0	https://cdn.durianproperty.com.my/images/classified_ads/301891311819146.jpg	tell tiffany tang saw ad durianproperty get best deal focus commercial space grade msc office retail leasing areas include klcc cbd kl city pj parts klang valley feel free contact tiffany ren whatsapp g inquiries office space proposals aspire tower kl eco city aspire tower strategically located new golden triangle kuala lumpur nestled within neighbourhoods bangsar mid valley city standing storeys…	tell tiffani tang saw ad durianproperti get best deal focu commerci space grade msc offic retail leas area includ klcc cbd kl citi pj part klang valley feel free contact tiffani ren whatsapp g inquiri offic space propos aspir tower kl eco citi aspir tower strateg locat new golden triangl kuala lumpur nestl within neighbourhood bangsar mid valley citi stand storey high tallest finest offic tower s…	['tell', 'tiffani', 'tang', 'saw', 'ad', 'durianproperti', 'get', 'best', 'deal', 'focu', 'commerci', 'space', 'grade', 'msc', 'offic', 'retail', 'leas', 'area', 'includ', 'klcc', 'cbd', 'kl', 'citi', 'pj', 'part', 'klang', 'valley', 'feel', 'free', 'contact', 'tiffani', 'ren', 'whatsapp', 'g', 'inquiri', 'offic', 'space', 'propos', 'aspir', 'tower', 'kl', 'eco', 'citi', 'aspir', 'tower', 'strate…	0	notfake	301891311819146.jpg	301891311819146	301891311819146.jpg	FAKE	1	301891311819146.jpg	jpg
3888	0	3921	315000	935	2	0	3	1	1	Tell Wayne Lee you saw this ad from DurianProperty to get best deal.PR1MA Alam Damai HOC Package: Better Offer, Free SPA Fee, Free MOT & Free Stamping Property Details : - 935sf - 3 Bedroom, 2 Bathroom - Nice View - 1 Covered Car Park - Move In Condition - Sale: RM315k ++ - Rental : RM 1,000 ++ Accessibility: - Convenient access to Connaught, Taman Len Sen, Tun Hussien Onn, Balakong, Seri Kembang…	Residensi PR1MA Alam Damai	Alam Damai	0	0	Residensi PR1MA Alam Damai, Alam Damai	3.05669	101.742	0	0	https://cdn.durianproperty.com.my/images/classified_ads/304131611975390.jpeg	tell wayne lee saw ad durianproperty get best deal prma alam damai hoc package better offer free spa fee free mot free stamping property details sf bedroom bathroom nice view covered car park move condition sale rmk rental rm accessibility convenient access connaught taman len sen tun hussien onn balakong seri kembangan near usci university convenient access cheras kajang highway convenient acces…	tell wayn lee saw ad durianproperti get best deal prma alam damai hoc packag better offer free spa fee free mot free stamp properti detail sf bedroom bathroom nice view cover car park move condit sale rmk rental rm access conveni access connaught taman len sen tun hussien onn balakong seri kembangan near usci univers conveni access chera kajang highway conveni access mrr suke highway facil commun…	['tell', 'wayn', 'lee', 'saw', 'ad', 'durianproperti', 'get', 'best', 'deal', 'prma', 'alam', 'damai', 'hoc', 'packag', 'better', 'offer', 'free', 'spa', 'fee', 'free', 'mot', 'free', 'stamp', 'properti', 'detail', 'sf', 'bedroom', 'bathroom', 'nice', 'view', 'cover', 'car', 'park', 'move', 'condit', 'sale', 'rmk', 'rental', 'rm', 'access', 'conveni', 'access', 'connaught', 'taman', 'len', 'sen',…	0	notfake	304131611975390.jpeg	304131611975390	304131611975390.jpeg	FAKE	1	304131611975390.jpeg	jpeg
3904	0	3937	2650000	5200	5	1	6	0	3	Tell Rohaini Daud you saw this ad from DurianProperty to get best deal.[PARTIALLY FURNISHED] Semi-D Double Storey House, Ficus Peak, Denai Alam. DETAILS : --------------------------------------- - Freehold / Non bumi - Land Area : 8000 sqft (Approx) - Build Up : 5200 sqft (Approx) - 6 Bedrooms & 5 +1 Bathrooms - Partially Furnished - Developer : Sime Darby PROPERTY FEATURES : --------------------…	Denai Alam	Shah Alam	0	2	Denai Alam, Shah Alam	3.16118	101.51	0	0	https://cdn.durianproperty.com.my/images/classified_ads/303683811944055.jpg	tell rohaini daud saw ad durianproperty get best deal partially furnished semi double storey house ficus peak denai alam details freehold non bumi land area sqft approx build sqft approx bedrooms bathrooms partially furnished developer sime darby property features newly extended renovated modern rustic industrial design concept luxurious kitchen cabinet rmk brand new units aircond units fans kitc…	tell rohaini daud saw ad durianproperti get best deal partial furnish semi doubl storey hous ficu peak denai alam detail freehold non bumi land area sqft approx build sqft approx bedroom bathroom partial furnish develop sime darbi properti featur newli extend renov modern rustic industri design concept luxuri kitchen cabinet rmk brand new unit aircond unit fan kitchen cabinet chandeli curtain war…	['tell', 'rohaini', 'daud', 'saw', 'ad', 'durianproperti', 'get', 'best', 'deal', 'partial', 'furnish', 'semi', 'doubl', 'storey', 'hous', 'ficu', 'peak', 'denai', 'alam', 'detail', 'freehold', 'non', 'bumi', 'land', 'area', 'sqft', 'approx', 'build', 'sqft', 'approx', 'bedroom', 'bathroom', 'partial', 'furnish', 'develop', 'sime', 'darbi', 'properti', 'featur', 'newli', 'extend', 'renov', 'moder…	0	notfake	303683811944055.jpg	303683811944055	303683811944055.jpg	FAKE	1	303683811944055.jpg	jpg
3906	0	3939	1200000	2228	4	1	5	0	4	Tell PH HOME AGENCY you saw this ad from DurianProperty to get best deal.Boulevard Condo for Sale Duplex Unit Nice View Corner unit 4 Car Parks 5 Rooms 4 Bathrooms 2228 square feet Selling Price RM1.2mil Negotiable Hectarworld Realty Sdn. Bhd. (Penang) (1133867-M)You may view Boulevard Condominium Profile here.	Boulevard Condominium	Ayer Itam	2	0	Boulevard Condominium, Ayer Itam	5.39776	100.294	1	1	https://cdn.durianproperty.com.my/images/classified_ads/301135611765765.jpg	tell ph home agency saw ad durianproperty get best deal boulevard condo sale duplex unit nice view corner unit car parks rooms bathrooms square feet selling price rm mil negotiable hectarworld realty sdn bhd penang may view boulevard condominium profile	tell ph home agenc saw ad durianproperti get best deal boulevard condo sale duplex unit nice view corner unit car park room bathroom squar feet sell price rm mil negoti hectarworld realti sdn bhd penang may view boulevard condominium profil	['tell', 'ph', 'home', 'agenc', 'saw', 'ad', 'durianproperti', 'get', 'best', 'deal', 'boulevard', 'condo', 'sale', 'duplex', 'unit', 'nice', 'view', 'corner', 'unit', 'car', 'park', 'room', 'bathroom', 'squar', 'feet', 'sell', 'price', 'rm', 'mil', 'negoti', 'hectarworld', 'realti', 'sdn', 'bhd', 'penang', 'may', 'view', 'boulevard', 'condominium', 'profil']	0	notfake	301135611765765.jpg	301135611765765	301135611765765.jpg	FAKE	1	301135611765765.jpg	jpg
3920	0	3953	800000	1409	3	1	3	0	3	Tell Michelle Poon you saw this ad from DurianProperty to get best deal.PROPERTY DETAILS Name: The Leafz Address: Off Jalan Kuchai Lama, Sungai Besi, Kuala Lumpur Developer: Exsim Development Completion Year: 2015 Type: Serviced Apartment Tenure: Freehold No. of Blocks: 3 No. of Storey: 22 No. of Units: 643 Land Area: 3.3 acres Built-up: 750 - 1,500 sf Maintenance Fee: RM0.44 psf Launch Price: Fr…	The Leafz	Sungai Besi	0	0	The Leafz, Sungai Besi	3.08475	101.695	1	1	https://cdn.durianproperty.com.my/images/classified_ads/300761811740932.JPG	tell michelle poon saw ad durianproperty get best deal property details name leafz address jalan kuchai lama sungai besi kuala lumpur developer exsim development completion year type serviced apartment tenure freehold blocks storey units land area acres built sf maintenance fee rm psf launch price rm psf layouts type a sf bedrooms type a sf bedrooms type a sf bedrooms type b sf bedrooms type b sf…	tell michel poon saw ad durianproperti get best deal properti detail name leafz address jalan kuchai lama sungai besi kuala lumpur develop exsim develop complet year type servic apart tenur freehold block storey unit land area acr built sf mainten fee rm psf launch price rm psf layout type a sf bedroom type a sf bedroom type a sf bedroom type b sf bedroom type b sf bedroom type c sf bedroom type …	['tell', 'michel', 'poon', 'saw', 'ad', 'durianproperti', 'get', 'best', 'deal', 'properti', 'detail', 'name', 'leafz', 'address', 'jalan', 'kuchai', 'lama', 'sungai', 'besi', 'kuala', 'lumpur', 'develop', 'exsim', 'develop', 'complet', 'year', 'type', 'servic', 'apart', 'tenur', 'freehold', 'block', 'storey', 'unit', 'land', 'area', 'acr', 'built', 'sf', 'mainten', 'fee', 'rm', 'psf', 'launch', …	0	notfake	300761811740932.JPG	300761811740932	300761811740932.JPG	FAKE	1	300761811740932.JPG	JPG
3958	0	3991	2300000	4653	5	1	5	0	3	Tell Benny Chew you saw this ad from DurianProperty to get best deal.PRESTIGIOUS DEVELOPMENT FOR EXCLUSIVITY AND LUXURY FOR PRIVATE PREVIEW KINDLY CALL FOR APPOINTMENT WITH JACK @ 010 325 0598 OR dLaman Greenville is sprawling across 56 acres of prime Land adjacen to the fast expanding bukit tinggi Klang which is well acclaimed to be one of the vibrant townships within the real estate scene of kl…	d'Laman Greenville	Klang	0	3	d'Laman Greenville, Klang	2.98242	101.448	0	0	https://cdn.durianproperty.com.my/images/classified_ads/290094711068809.jpg	tell benny chew saw ad durianproperty get best deal prestigious development exclusivity luxury private preview kindly call appointment jack dlaman greenville sprawling across acres prime land adjacen fast expanding bukit tinggi klang well acclaimed one vibrant townships within real estate scene klang valley offering homes contemporary styles sizes premium dlaman greenville provides exclusivity lu…	tell benni chew saw ad durianproperti get best deal prestigi develop exclus luxuri privat preview kindli call appoint jack dlaman greenvil sprawl across acr prime land adjacen fast expand bukit tinggi klang well acclaim one vibrant township within real estat scene klang valley offer home contemporari style size premium dlaman greenvil provid exclus luxuri total peac mind tier secur system picture…	['tell', 'benni', 'chew', 'saw', 'ad', 'durianproperti', 'get', 'best', 'deal', 'prestigi', 'develop', 'exclus', 'luxuri', 'privat', 'preview', 'kindli', 'call', 'appoint', 'jack', 'dlaman', 'greenvil', 'sprawl', 'across', 'acr', 'prime', 'land', 'adjacen', 'fast', 'expand', 'bukit', 'tinggi', 'klang', 'well', 'acclaim', 'one', 'vibrant', 'township', 'within', 'real', 'estat', 'scene', 'klang', '…	0	notfake	290094711068809.jpg	290094711068809	290094711068809.jpg	FAKE	1	290094711068809.jpg	jpg
3959	0	3992	1080000	1759	4	1	3	1	2	Tell khairul marhan bin solehan you saw this ad from DurianProperty to get best deal.Seri Riana Residence Condominium For Sale Property Details : 1759 sqft Strata title 3+1 room, 4 Bathroom 2 Parking Bays Level 3A, low floor Maintenance Fee: RM 0.28 per sqft Facilities:- +40m Lap Swimming Pool (Infinity Pool) +Wading Pool, Family Pool, Sauna, +Squash Court +Playground, 24 Hours Security with CCTV…	Seri Riana Residence	Wangsa Maju	0	0	Seri Riana Residence, Wangsa Maju	3.19621	101.74	0	0	https://cdn.durianproperty.com.my/images/classified_ads/304806012022680.jpg	tell khairul marhan bin solehan saw ad durianproperty get best deal seri riana residence condominium sale property details sqft strata title room bathroom parking bays level a low floor maintenance fee rm per sqft facilities m lap swimming pool infinity pool wading pool family pool sauna squash court playground hours security cctvs gymnasium cycling park indoor badminton court indoor basketball c…	tell khairul marhan bin solehan saw ad durianproperti get best deal seri riana resid condominium sale properti detail sqft strata titl room bathroom park bay level a low floor mainten fee rm per sqft facil m lap swim pool infin pool wade pool famili pool sauna squash court playground hour secur cctv gymnasium cycl park indoor badminton court indoor basketbal court indoor tenni court bbq pavilion …	['tell', 'khairul', 'marhan', 'bin', 'solehan', 'saw', 'ad', 'durianproperti', 'get', 'best', 'deal', 'seri', 'riana', 'resid', 'condominium', 'sale', 'properti', 'detail', 'sqft', 'strata', 'titl', 'room', 'bathroom', 'park', 'bay', 'level', 'a', 'low', 'floor', 'mainten', 'fee', 'rm', 'per', 'sqft', 'facil', 'm', 'lap', 'swim', 'pool', 'infin', 'pool', 'wade', 'pool', 'famili', 'pool', 'sauna',…	0	notfake	304806012022680.jpg	304806012022680	304806012022680.jpg	FAKE	1	304806012022680.jpg	jpg
3983	0	4016	2700000	2702	5	1	5	0	3	Tell Vincent Lau you saw this ad from DurianProperty to get best deal.**Pavilion Hilltop @ Mont Kiara** (Luxury Condominium unit) for SALE Property Info: - Build up : 2,702 sqft - 4+1 Bedrooms, 5 Bathrooms, 3 Carparks - PARTIAL FURNISHED - RENOVATED - KLCC VIEW - Gated & Guarded (24-hours security) - Middle floor - With facilities - Nice location - Well maintain by owner - Just refurbished and re…	Pavilion Hilltop	Mont Kiara	0	0	Pavilion Hilltop, Mont Kiara	3.17005	101.658	0	0	https://cdn.durianproperty.com.my/images/classified_ads/304174011979038.jpg	tell vincent lau saw ad durianproperty get best deal pavilion hilltop mont kiara luxury condominium unit sale property info build sqft bedrooms bathrooms carparks partial furnished renovated klcc view gated guarded hours security middle floor facilities nice location well maintain owner refurbished repainted owner move condition selling price rm nego facilities m infinity pool m pool outdoor jacu…	tell vincent lau saw ad durianproperti get best deal pavilion hilltop mont kiara luxuri condominium unit sale properti info build sqft bedroom bathroom carpark partial furnish renov klcc view gate guard hour secur middl floor facil nice locat well maintain owner refurbish repaint owner move condit sell price rm nego facil m infin pool m pool outdoor jacuzzi outdoor spa loung float cabana wade poo…	['tell', 'vincent', 'lau', 'saw', 'ad', 'durianproperti', 'get', 'best', 'deal', 'pavilion', 'hilltop', 'mont', 'kiara', 'luxuri', 'condominium', 'unit', 'sale', 'properti', 'info', 'build', 'sqft', 'bedroom', 'bathroom', 'carpark', 'partial', 'furnish', 'renov', 'klcc', 'view', 'gate', 'guard', 'hour', 'secur', 'middl', 'floor', 'facil', 'nice', 'locat', 'well', 'maintain', 'owner', 'refurbish',…	1	fake	304174011979038.jpg	304174011979038	304174011979038.jpg	FAKE	1	304174011979038.jpg	jpg
4091	0	4126	177000	900	2	0	3	1	2	Tell Ansley Mei you saw this ad from DurianProperty to get best deal.Full Loan Kuota (T&C applied) Affordable landed house near to WCE Monthly Installment RM700+, Rental up to RM1000 Single Storey Terrace with Exclusive Clubhouse Walking distance to hospital, shoplots, shopping mall.. Exclusive clubhouse to enjoy Easy to get tenants Easy Access to West Coast Highway 30 min to Sitiawan 60 min to L…	Taman Kuala Selangor Utama	Kuala Selangor	0	1	Taman Kuala Selangor Utama, Kuala Selangor	3.33474	101.272	0	0	https://cdn.durianproperty.com.my/images/classified_ads/296853911476149.jpg	tell ansley mei saw ad durianproperty get best deal full loan kuota c applied affordable landed house near wce monthly installment rm rental rm single storey terrace exclusive clubhouse walking distance hospital shoplots shopping mall exclusive clubhouse enjoy easy get tenants easy access west coast highway min sitiawan min lumut pangkor min kl grab fast limited units mco house package help save …	tell ansley mei saw ad durianproperti get best deal full loan kuota c appli afford land hous near wce monthli instal rm rental rm singl storey terrac exclus clubhous walk distanc hospit shoplot shop mall exclus clubhous enjoy easi get tenant easi access west coast highway min sitiawan min lumut pangkor min kl grab fast limit unit mco hous packag help save rmk book fee rm inquiri kindli contact cl…	['tell', 'ansley', 'mei', 'saw', 'ad', 'durianproperti', 'get', 'best', 'deal', 'full', 'loan', 'kuota', 'c', 'appli', 'afford', 'land', 'hous', 'near', 'wce', 'monthli', 'instal', 'rm', 'rental', 'rm', 'singl', 'storey', 'terrac', 'exclus', 'clubhous', 'walk', 'distanc', 'hospit', 'shoplot', 'shop', 'mall', 'exclus', 'clubhous', 'enjoy', 'easi', 'get', 'tenant', 'easi', 'access', 'west', 'coast'…	0	notfake	296853911476149.jpg	296853911476149	296853911476149.jpg	FAKE	1	296853911476149.jpg	jpg
4162	0	4199	715000	931	2	1	3	0	2	Tell Louis Koh you saw this ad from DurianProperty to get best deal.Cozy High-End Area! Some more Is FreeHold !! Don't Hesitate!! Enquiry Now !! You Can Choose Mountain Or Natural Lake & City View!!! X No Exsim Project !!! X No Empire Project!!! We Are New FREEHOLD Condo At High-End Location!!! Some more Live in Private Natural Forest Reserve Area Project Detail: Price Start From RM700K 925 sqft …	Country Heights Damansara	Kuala Lumpur	1	0	Country Heights Damansara, Kuala Lumpur	3.17836	101.621	0	0	https://cdn.durianproperty.com.my/images/classified_ads/301121411764561.jpg	tell louis koh saw ad durianproperty get best deal cozy high end area freehold hesitate enquiry choose mountain natural lake city view x exsim project x empire project new freehold condo high end location live private natural forest reserve area project detail price start rmk sqft sqft rooms bath free car park free quality partial furnished high security area gated guarded tier security super low…	tell loui koh saw ad durianproperti get best deal cozi high end area freehold hesit enquiri choos mountain natur lake citi view x exsim project x empir project new freehold condo high end locat live privat natur forest reserv area project detail price start rmk sqft sqft room bath free car park free qualiti partial furnish high secur area gate guard tier secur super low densiti per tower total ty…	['tell', 'loui', 'koh', 'saw', 'ad', 'durianproperti', 'get', 'best', 'deal', 'cozi', 'high', 'end', 'area', 'freehold', 'hesit', 'enquiri', 'choos', 'mountain', 'natur', 'lake', 'citi', 'view', 'x', 'exsim', 'project', 'x', 'empir', 'project', 'new', 'freehold', 'condo', 'high', 'end', 'locat', 'live', 'privat', 'natur', 'forest', 'reserv', 'area', 'project', 'detail', 'price', 'start', 'rmk', '…	0	notfake	301121411764561.jpg	301121411764561	301121411764561.jpg	FAKE	1	301121411764561.jpg	jpg
4177	0	4214	445000	320	1	2	1	0	3	Genting Highlands New Project !!! Call Alvin Lau @ 011-33331433 *** Genting New Project @ Freehold *** - 0% Downpayment - Rental Return from RM2,600-Rm9,500 - Near to Genting Theme Park - Shuttle Bus service provided. - Fully-Furnished with Luxury Interior Design - FREE ALL LAWYER FEES ( Pictures shown might not from the actual unit, it is for illustration purpose only ) SHOWROOM IS READY FOR VIE…	Grand Ion Majestic	Genting Highlands	8	0	Grand Ion Majestic, Genting Highlands	3.43158	101.79	1	0	https://cdn.durianproperty.com.my/images/classified_ads/299817911678086.jpg	genting highlands new project call alvin lau genting new project freehold downpayment rental return rm rm near genting theme park shuttle bus service provided fully furnished luxury interior design free lawyer fees pictures shown might actual unit illustration purpose showroom ready viewing appreciate view appointment personalized presentation please contact would pleasure serve please call sms w…	gent highland new project call alvin lau gent new project freehold downpay rental return rm rm near gent theme park shuttl bu servic provid fulli furnish luxuri interior design free lawyer fee pictur shown might actual unit illustr purpos showroom readi view appreci view appoint person present pleas contact would pleasur serv pleas call sm whatsapp alvin lau alvin lau you may view grand ion majes…	['gent', 'highland', 'new', 'project', 'call', 'alvin', 'lau', 'gent', 'new', 'project', 'freehold', 'downpay', 'rental', 'return', 'rm', 'rm', 'near', 'gent', 'theme', 'park', 'shuttl', 'bu', 'servic', 'provid', 'fulli', 'furnish', 'luxuri', 'interior', 'design', 'free', 'lawyer', 'fee', 'pictur', 'shown', 'might', 'actual', 'unit', 'illustr', 'purpos', 'showroom', 'readi', 'view', 'appreci', 'v…	1	fake	299817911678086.jpg	299817911678086	299817911678086.jpg	FAKE	1	299817911678086.jpg	jpg
4184	0	4221	250000	500	2	2	2	1	1	Tell Muhammad Aizat you saw this ad from DurianProperty to get best deal."You may view Core Soho Suites @ KIP Central Profile here.	Core Soho Suites @ KIP Central	Sepang	3	0	Core Soho Suites @ KIP Central, Sepang	2.82161	101.696	0	0	https://cdn.durianproperty.com.my/images/classified_ads/300429711716252.jpg	tell muhammad aizat saw ad durianproperty get best deal may view core soho suites kip central profile	tell muhammad aizat saw ad durianproperti get best deal may view core soho suit kip central profil	['tell', 'muhammad', 'aizat', 'saw', 'ad', 'durianproperti', 'get', 'best', 'deal', 'may', 'view', 'core', 'soho', 'suit', 'kip', 'central', 'profil']	0	notfake	300429711716252.jpg	300429711716252	300429711716252.jpg	FAKE	1	300429711716252.jpg	jpg
4376	0	4415	468000	850	2	0	3	1	2	Tell Thomes Ng you saw this ad from DurianProperty to get best deal.Eco Green Concept Condominium Located between Wangsa Maju and Melawati Pre Launch Phase Now !!! To Grab More Early Bird Package, please click links below: ++ Why M Adora ++ --------------------------- ‚Ä¢ Free Bus to LRT Sri Rampai [ Saves petrol cost and time ] ‚Ä¢ Luxury Concept Design [ Start from only RM468K ] ‚Ä¢ Non Blocked…	M Adora	Taman Wangsa Melawati	0	0	M Adora, Taman Wangsa Melawati	3.20431	101.746	0	0	https://cdn.durianproperty.com.my/images/classified_ads/300130311696301.jpeg	tell thomes ng saw ad durianproperty get best deal eco green concept condominium located wangsa maju melawati pre launch phase grab early bird package please click links adora free bus lrt sri rampai saves petrol cost time luxury concept design start rmk non blocked view surrounded landed house different type access road kl city centre smooth traffic residential title shoplot strangers allowed ex…	tell thome ng saw ad durianproperti get best deal eco green concept condominium locat wangsa maju melawati pre launch phase grab earli bird packag pleas click link adora free bu lrt sri rampai save petrol cost time luxuri concept design start rmk non block view surround land hous differ type access road kl citi centr smooth traffic residenti titl shoplot stranger allow except visitor registr elec…	['tell', 'thome', 'ng', 'saw', 'ad', 'durianproperti', 'get', 'best', 'deal', 'eco', 'green', 'concept', 'condominium', 'locat', 'wangsa', 'maju', 'melawati', 'pre', 'launch', 'phase', 'grab', 'earli', 'bird', 'packag', 'pleas', 'click', 'link', 'adora', 'free', 'bu', 'lrt', 'sri', 'rampai', 'save', 'petrol', 'cost', 'time', 'luxuri', 'concept', 'design', 'start', 'rmk', 'non', 'block', 'view', '…	0	notfake	300130311696301.jpeg	300130311696301	300130311696301.jpeg	FAKE	1	300130311696301.jpeg	jpeg
4452	0	4492	550000	678	2	1	2	1	1	Tell OSK Property you saw this ad from DurianProperty to get best deal.Connected to 3 major highways Extensive amenities within 5km radius Matured Neighbourhood 2.2-Acre Facilities Podium Practical Layout Linked-Bridge to Jaya One Space of Storage Privacy & Safety Generous with ParkingYou may view Ryan Miho Profile here.	Ryan Miho	Section 13	0	0	Ryan Miho, Section 13	3.11861	101.635	0	0	https://cdn.durianproperty.com.my/images/classified_ads/300091911693865.jpg	tell osk property saw ad durianproperty get best deal connected major highways extensive amenities within km radius matured neighbourhood acre facilities podium practical layout linked bridge jaya one space storage privacy safety generous parkingyou may view ryan miho profile	tell osk properti saw ad durianproperti get best deal connect major highway extens amen within km radiu matur neighbourhood acr facil podium practic layout link bridg jaya one space storag privaci safeti gener parkingy may view ryan miho profil	['tell', 'osk', 'properti', 'saw', 'ad', 'durianproperti', 'get', 'best', 'deal', 'connect', 'major', 'highway', 'extens', 'amen', 'within', 'km', 'radiu', 'matur', 'neighbourhood', 'acr', 'facil', 'podium', 'practic', 'layout', 'link', 'bridg', 'jaya', 'one', 'space', 'storag', 'privaci', 'safeti', 'gener', 'parkingy', 'may', 'view', 'ryan', 'miho', 'profil']	0	notfake	300091911693865.jpg	300091911693865	300091911693865.jpg	FAKE	1	300091911693865.jpg	jpg
4453	0	4493	378888	2400	3	0	4	1	2	Tell Yathes property consultant you saw this ad from DurianProperty to get best deal.Double Storey House for Sales *4 Bedroom 3 Bathroom 1 store room *Freehold *Fully Extended car porch & kitchen Awesome Promotion Package: Booking Only RM 1000 ÔºÅÔºÅÔºÅ FREE - SPA Legal Fees FREE - SPA Stamp Duty Fees FREE - Loan Legal Fees FREE - Loan Stamp Duty Fees FREE - MOT FREE - Club House Membership FREE …	Taman Ampangan	Seremban	3	1	Taman Ampangan, Seremban	2.72648	102.001	0	0	https://cdn.durianproperty.com.my/images/classified_ads/300481011720234.jpg	tell yathes property consultant saw ad durianproperty get best deal double storey house sales bedroom bathroom store room freehold fully extended car porch kitchen awesome promotion package booking rm free spa legal fees free spa stamp duty fees free loan legal fees free loan stamp duty fees free mot free club house membership free hours gated guarded free broadband amenities min aeon tesco bank …	tell yath properti consult saw ad durianproperti get best deal doubl storey hous sale bedroom bathroom store room freehold fulli extend car porch kitchen awesom promot packag book rm free spa legal fee free spa stamp duti fee free loan legal fee free loan stamp duti fee free mot free club hous membership free hour gate guard free broadband amen min aeon tesco bank panel hospit market school fast …	['tell', 'yath', 'properti', 'consult', 'saw', 'ad', 'durianproperti', 'get', 'best', 'deal', 'doubl', 'storey', 'hous', 'sale', 'bedroom', 'bathroom', 'store', 'room', 'freehold', 'fulli', 'extend', 'car', 'porch', 'kitchen', 'awesom', 'promot', 'packag', 'book', 'rm', 'free', 'spa', 'legal', 'fee', 'free', 'spa', 'stamp', 'duti', 'fee', 'free', 'loan', 'legal', 'fee', 'free', 'loan', 'stamp', '…	0	notfake	300481011720234.jpg	300481011720234	300481011720234.jpg	FAKE	1	300481011720234.jpg	jpg
4497	0	4537	500000	1100	2	0	3	1	1	Tell Shuhaida Binti Ahmad Khan you saw this ad from DurianProperty to get best deal.Anggun Lumayan Service Apartment Bandar Tun Razak, Cheras New Launch Service Residence Nice View with Facing KLCC & Lake Permaisuri Detail Property: # Semi-D Design Concept # Tenure : Leasehold # Low Density : 2 Blocks only! Block A : 33 level & 207units Block B : 27 level & 143 units Total Units : 350 units with …	Anggun Lumayan	Bandar Sri Permaisuri	0	0	Anggun Lumayan, Bandar Sri Permaisuri	3.10028	101.717	0	1	https://cdn.durianproperty.com.my/images/classified_ads/303042111903201.JPG	tell shuhaida binti ahmad khan saw ad durianproperty get best deal anggun lumayan service apartment bandar tun razak cheras new launch service residence nice view facing klcc lake permaisuri detail property semi design concept tenure leasehold low density blocks block level units block b level units total units units car parks facing klcc jalan lake permaisuri jalan target completion build sqft b…	tell shuhaida binti ahmad khan saw ad durianproperti get best deal anggun lumayan servic apart bandar tun razak chera new launch servic resid nice view face klcc lake permaisuri detail properti semi design concept tenur leasehold low densiti block block level unit block b level unit total unit unit car park face klcc jalan lake permaisuri jalan target complet build sqft bedroom bathroom facil lev…	['tell', 'shuhaida', 'binti', 'ahmad', 'khan', 'saw', 'ad', 'durianproperti', 'get', 'best', 'deal', 'anggun', 'lumayan', 'servic', 'apart', 'bandar', 'tun', 'razak', 'chera', 'new', 'launch', 'servic', 'resid', 'nice', 'view', 'face', 'klcc', 'lake', 'permaisuri', 'detail', 'properti', 'semi', 'design', 'concept', 'tenur', 'leasehold', 'low', 'densiti', 'block', 'block', 'level', 'unit', 'block'…	0	notfake	303042111903201.JPG	303042111903201	303042111903201.JPG	FAKE	1	303042111903201.JPG	JPG
4619	0	4660	480000	900	2	0	3	0	2	Tell Ivan Wong you saw this ad from DurianProperty to get best deal.Most Affordable MRT Line Project in Town Limited Units !!! Project Details:- # FreeHold # Multi-Tier Security # Low Density @ one block only !! # 2 Rooms 2 Bathrooms @ 399K++ # 3 Rooms 2 Bathrooms @ 480K++ Amenities:- #1 min walk to MRT # 5 min to Leisure Mall # 5 min to C180 # 5 min to Mahkota Cheras Package:- # Free SPA Legal &…	Taman Cheras Awana	Cheras	0	0	Taman Cheras Awana, Cheras	3.08937	101.762	0	1	https://cdn.durianproperty.com.my/images/classified_ads/303435311928560.jpg	tell ivan wong saw ad durianproperty get best deal affordable mrt line project town limited units project details freehold multi tier security low density one block rooms bathrooms k rooms bathrooms k amenities min walk mrt min leisure mall min c min mahkota cheras package free spa legal disbursement fee free loan legal disbursement fee free loan stamp duty kindly contact ivan wong register view …	tell ivan wong saw ad durianproperti get best deal afford mrt line project town limit unit project detail freehold multi tier secur low densiti one block room bathroom k room bathroom k amen min walk mrt min leisur mall min c min mahkota chera packag free spa legal disburs fee free loan legal disburs fee free loan stamp duti kindli contact ivan wong regist view show unit thank ivan mani buyer com…	['tell', 'ivan', 'wong', 'saw', 'ad', 'durianproperti', 'get', 'best', 'deal', 'afford', 'mrt', 'line', 'project', 'town', 'limit', 'unit', 'project', 'detail', 'freehold', 'multi', 'tier', 'secur', 'low', 'densiti', 'one', 'block', 'room', 'bathroom', 'k', 'room', 'bathroom', 'k', 'amen', 'min', 'walk', 'mrt', 'min', 'leisur', 'mall', 'min', 'c', 'min', 'mahkota', 'chera', 'packag', 'free', 'spa…	1	fake	303435311928560.jpg	303435311928560	303435311928560.jpg	FAKE	1	303435311928560.jpg	jpg
4737	0	4779	300000	3000	4	0	5	0	2	Tell Wilson Property you saw this ad from DurianProperty to get best deal.(85% SOLD OUT) BELOW MARKET VALUE - THE ONLY AFFORDABLE LUXURY RESORT HOMES ‚úî Breathtaking view, find serenity within your urban living homes. AWARD WINNING TOWNSHIP ‚úî No financial commitment, high investment appreciation ‚úî LAST PHASE DISCOUNT ‚úî limited units ‚úî Free of all legal fees and NO extra or hidden charges…	Kota Kemuning	Shah Alam	0	2	Kota Kemuning, Shah Alam	2.9925	101.541	0	0	https://cdn.durianproperty.com.my/images/classified_ads/302706311879765.jpeg	tell wilson property saw ad durianproperty get best deal sold market value affordable luxury resort homes breathtaking view find serenity within urban living homes award winning township financial commitment high investment appreciation last phase discount limited units free legal fees extra hidden charges direct unit developer please contact show house booking busy weekends please book early nic…	tell wilson properti saw ad durianproperti get best deal sold market valu afford luxuri resort home breathtak view find seren within urban live home award win township financi commit high invest appreci last phase discount limit unit free legal fee extra hidden charg direct unit develop pleas contact show hous book busi weekend pleas book earli nice day disclaim photo illustr purpos appreci under…	['tell', 'wilson', 'properti', 'saw', 'ad', 'durianproperti', 'get', 'best', 'deal', 'sold', 'market', 'valu', 'afford', 'luxuri', 'resort', 'home', 'breathtak', 'view', 'find', 'seren', 'within', 'urban', 'live', 'home', 'award', 'win', 'township', 'financi', 'commit', 'high', 'invest', 'appreci', 'last', 'phase', 'discount', 'limit', 'unit', 'free', 'legal', 'fee', 'extra', 'hidden', 'charg', '…	1	fake	302706311879765.jpeg	302706311879765	302706311879765.jpeg	FAKE	1	302706311879765.jpeg	jpeg
4777	0	4820	1080000	2200	4	0	4	1	2	Tell Bailey Tan you saw this ad from DurianProperty to get best deal.Brand New Ampang Landed Property Hurry up to Contact or Whatsapp Bailey Tan 012-3431061 For Viewing or More Information. * Green Eco Environment * Forest Fronted Mountain Area * Low Density Super High End area * Land area 33Acres ________________________________ # 300 units # Free SPA Legal # Disbursement # Free Loan Legal # Sta…	Taman Setiawangsa	Setiawangsa	1	2	Taman Setiawangsa, Setiawangsa	3.18301	101.746	0	0	https://cdn.durianproperty.com.my/images/classified_ads/301099111762825.jpg	tell bailey tan saw ad durianproperty get best deal brand new ampang landed property hurry contact whatsapp bailey tan viewing information green eco environment forest fronted mountain area low density super high end area land area acres units free spa legal disbursement free loan legal stamp duty tier security full facilities luxury lifestyle easy access highway silk duke ekve min kl center min …	tell bailey tan saw ad durianproperti get best deal brand new ampang land properti hurri contact whatsapp bailey tan view inform green eco environ forest front mountain area low densiti super high end area land area acr unit free spa legal disburs free loan legal stamp duti tier secur full facil luxuri lifestyl easi access highway silk duke ekv min kl center min ampang point min melawati mall jus…	['tell', 'bailey', 'tan', 'saw', 'ad', 'durianproperti', 'get', 'best', 'deal', 'brand', 'new', 'ampang', 'land', 'properti', 'hurri', 'contact', 'whatsapp', 'bailey', 'tan', 'view', 'inform', 'green', 'eco', 'environ', 'forest', 'front', 'mountain', 'area', 'low', 'densiti', 'super', 'high', 'end', 'area', 'land', 'area', 'acr', 'unit', 'free', 'spa', 'legal', 'disburs', 'free', 'loan', 'legal',…	0	notfake	301099111762825.jpg	301099111762825	301099111762825.jpg	FAKE	1	301099111762825.jpg	jpg
4826	0	4870	230000	138520	0	0	0	0	0	Tell Zuraini bin Zallin you saw this ad from DurianProperty to get best deal.Tanah Untuk Di Jual Lokasi: Kampung Renal Kuala Klawang Status: Pertanian Zoning: Pertanian Keluasan: 3.18 ekar (138,574 sf) Pajakan: Freehold Malay Reserve Individual owner. Tanah terletak di lapisan ketiga, Off Jalan Kuala Klawang ‚Äì Seremban. Sekarang ini terdapat pokok getah yang masih muda dan belum mengeluarkan ha…	Kuala Klawang	Negeri Sembilan	3	5	Kuala Klawang, Negeri Sembilan	2.93839	102.069	0	0	https://cdn.durianproperty.com.my/images/classified_ads/300048911690907.jpeg	tell zuraini bin zallin saw ad durianproperty get best deal land sale location kampung renal kuala klawang status agricultural zoning agricultural area acres sf lease freehold malay reserve individual owner land located third layer jalan kuala klawang seremban right rubber trees still young yet produced fruit price rm negotiated interested viewing appointment contact zuraini pea rescom realty coa…	tell zuraini bin zallin saw ad durianproperti get best deal land sale locat kampung renal kuala klawang statu agricultur zone agricultur area acr sf leas freehold malay reserv individu owner land locat third layer jalan kuala klawang seremban right rubber tree still young yet produc fruit price rm negoti interest view appoint contact zuraini pea rescom realti coalist hawa pleas see list may view …	['tell', 'zuraini', 'bin', 'zallin', 'saw', 'ad', 'durianproperti', 'get', 'best', 'deal', 'land', 'sale', 'locat', 'kampung', 'renal', 'kuala', 'klawang', 'statu', 'agricultur', 'zone', 'agricultur', 'area', 'acr', 'sf', 'leas', 'freehold', 'malay', 'reserv', 'individu', 'owner', 'land', 'locat', 'third', 'layer', 'jalan', 'kuala', 'klawang', 'seremban', 'right', 'rubber', 'tree', 'still', 'youn…	0	notfake	300048911690907.jpeg	300048911690907	300048911690907.jpeg	FAKE	1	300048911690907.jpeg	jpeg
4843	0	4887	1000000	1238	2	1	3	1	2	Tell Rasyid Anuar you saw this ad from DurianProperty to get best deal.SALE- VIVO Residential Suites @ 9 Seputeh, Jalan Klang Lama - Developer MRCB Land - Build-up 1238 sqft - 3 Beds - 2 Baths - Semi-furnished with kitchen cabinet, air-conditioners, and fridge - High floor unit For sale at RM1,000,000. Please contact Rasyid on 017 3429140 from IPC Realty Sdn Bhd (1)1440, REN 19326. Can consider r…	VIVO RESIDENCES @ 9 Seputeh	Old Klang Road	0	0	VIVO RESIDENCES @ 9 Seputeh, Old Klang Road	3.10565	101.677	0	0	https://cdn.durianproperty.com.my/images/classified_ads/301374011784023.jpeg	tell rasyid anuar saw ad durianproperty get best deal sale vivo residential suites seputeh jalan klang lama developer mrcb land build sqft beds baths semi furnished kitchen cabinet air conditioners fridge high floor unit sale rm please contact rasyid ipc realty sdn bhd ren consider rental thank youyou may view vivo residences seputeh profile	tell rasyid anuar saw ad durianproperti get best deal sale vivo residenti suit seputeh jalan klang lama develop mrcb land build sqft bed bath semi furnish kitchen cabinet air condition fridg high floor unit sale rm pleas contact rasyid ipc realti sdn bhd ren consid rental thank youyou may view vivo resid seputeh profil	['tell', 'rasyid', 'anuar', 'saw', 'ad', 'durianproperti', 'get', 'best', 'deal', 'sale', 'vivo', 'residenti', 'suit', 'seputeh', 'jalan', 'klang', 'lama', 'develop', 'mrcb', 'land', 'build', 'sqft', 'bed', 'bath', 'semi', 'furnish', 'kitchen', 'cabinet', 'air', 'condition', 'fridg', 'high', 'floor', 'unit', 'sale', 'rm', 'pleas', 'contact', 'rasyid', 'ipc', 'realti', 'sdn', 'bhd', 'ren', 'consid…	0	notfake	301374011784023.jpeg	301374011784023	301374011784023.jpeg	FAKE	1	301374011784023.jpeg	jpeg
4921	0	4966	680000	2613	4	0	5	0	4	Tell Vivian Poh you saw this ad from DurianProperty to get best deal.New Launching Double Storey Terrace House (Eco Friendly Environment | Close to Bandar Sri Damansara ) Best Deal In town Landed Property CORNER | INTERMEDIATE | ENDLOT ( Available now) Individual Title Clubhouse Facalities 50- Acer Central Park Showroom is ready to visit Hurry Up Make Appointment : - AAA Estate Agents Sdn. Bhd. (…	Bandar Seri Coalfields	Sungai Buloh	0	1	Bandar Seri Coalfields, Sungai Buloh	3.24087	101.48	0	0	https://cdn.durianproperty.com.my/images/classified_ads/304084911971831.jpg	tell vivian poh saw ad durianproperty get best deal new launching double storey terrace house eco friendly environment close bandar sri damansara best deal town landed property corner intermediate endlot available individual title clubhouse facalities acer central park showroom ready visit hurry make appointment estate agents sdn bhd e may view bandar seri coalfields profile	tell vivian poh saw ad durianproperti get best deal new launch doubl storey terrac hous eco friendli environ close bandar sri damansara best deal town land properti corner intermedi endlot avail individu titl clubhous facal acer central park showroom readi visit hurri make appoint estat agent sdn bhd e may view bandar seri coalfield profil	['tell', 'vivian', 'poh', 'saw', 'ad', 'durianproperti', 'get', 'best', 'deal', 'new', 'launch', 'doubl', 'storey', 'terrac', 'hous', 'eco', 'friendli', 'environ', 'close', 'bandar', 'sri', 'damansara', 'best', 'deal', 'town', 'land', 'properti', 'corner', 'intermedi', 'endlot', 'avail', 'individu', 'titl', 'clubhous', 'facal', 'acer', 'central', 'park', 'showroom', 'readi', 'visit', 'hurri', 'ma…	0	notfake	304084911971831.jpg	304084911971831	304084911971831.jpg	FAKE	1	304084911971831.jpg	jpg
4934	0	4979	480000	1250	2	0	3	0	2	Tell Elvin Teo you saw this ad from DurianProperty to get best deal.*FREEHOLD PROPERTY* 1. Low Density Condo 2. Suitable for people who love peaceful area (no highway vehicle sound) 3. 1 minutes to 99 speedmart 4. Outside condo is landed area ( Mostly Chinese) 5. 3 minutes to Bandar Mahkota Cheras main commercial area 6. 3 minutes to Bandar Sungai Long Utar 7. 2 minutes to SILK highway (Turn left…	Permata Residence	Bandar Sungai Long	0	0	Permata Residence, Bandar Sungai Long	3.0418	101.793	0	0	https://cdn.durianproperty.com.my/images/classified_ads/303761511950465.jpeg	tell elvin teo saw ad durianproperty get best deal freehold property low density condo suitable people love peaceful area highway vehicle sound minutes speedmart outside condo landed area mostly chinese minutes bandar mahkota cheras main commercial area minutes bandar sungai long utar minutes silk highway turn left silk turn right kl minutes kl without jam minutes petrol station covered parkingyo…	tell elvin teo saw ad durianproperti get best deal freehold properti low densiti condo suitabl peopl love peac area highway vehicl sound minut speedmart outsid condo land area mostli chines minut bandar mahkota chera main commerci area minut bandar sungai long utar minut silk highway turn left silk turn right kl minut kl without jam minut petrol station cover parkingy may view permata resid profil	['tell', 'elvin', 'teo', 'saw', 'ad', 'durianproperti', 'get', 'best', 'deal', 'freehold', 'properti', 'low', 'densiti', 'condo', 'suitabl', 'peopl', 'love', 'peac', 'area', 'highway', 'vehicl', 'sound', 'minut', 'speedmart', 'outsid', 'condo', 'land', 'area', 'mostli', 'chines', 'minut', 'bandar', 'mahkota', 'chera', 'main', 'commerci', 'area', 'minut', 'bandar', 'sungai', 'long', 'utar', 'minut…	0	notfake	303761511950465.jpeg	303761511950465	303761511950465.jpeg	FAKE	1	303761511950465.jpeg	jpeg
4960	0	5005	438300	1640	3	0	5	0	2	Tell AMALAN SETAR ( M ) SDN BHD you saw this ad from DurianProperty to get best deal.Amalan Setar Memperkenalkan Rumah Fasa akhir 6&8 yang lebih kontemporari dan menarik * * RUMAH TERES 2 TINGKAT MAMPU MILIK UNTUK ANDA HANYA 15 MINIT MASA PERJALANAN DARI SELAYANG MELALUI RAWANG BYPASS * * FREE SPA LEGAL FEE FREE LOAN LEGAL FEE FREE STAMP DUTY ON MOT * * YURAN TEMPAHAN HANYA SERENDAH RM500. * * Hu…	Alamanda Parklands	Rawang	0	1	Alamanda Parklands, Rawang	3.37014	101.572	0	0	https://cdn.durianproperty.com.my/images/classified_ads/293376511421638.jpg	tell amalan setar sdn bhd saw ad durianproperty get best deal amalan setar introduces contemporary attractive final phase house affordable story terrace house minutes travel time selayang via rawang bypass free spa legal fee free loan legal fee free stamp duty mot reservation fee low rm contact sales assistant direct developer information mr khairul size x central unit built area sqft corner unit…	tell amalan setar sdn bhd saw ad durianproperti get best deal amalan setar introduc contemporari attract final phase hous afford stori terrac hous minut travel time selayang via rawang bypass free spa legal fee free loan legal fee free stamp duti mot reserv fee low rm contact sale assist direct develop inform mr khairul size x central unit built area sqft corner unit built area sqft bedroom bathr…	['tell', 'amalan', 'setar', 'sdn', 'bhd', 'saw', 'ad', 'durianproperti', 'get', 'best', 'deal', 'amalan', 'setar', 'introduc', 'contemporari', 'attract', 'final', 'phase', 'hous', 'afford', 'stori', 'terrac', 'hous', 'minut', 'travel', 'time', 'selayang', 'via', 'rawang', 'bypass', 'free', 'spa', 'legal', 'fee', 'free', 'loan', 'legal', 'fee', 'free', 'stamp', 'duti', 'mot', 'reserv', 'fee', 'low…	0	notfake	293376511421638.jpg	293376511421638	293376511421638.jpg	FAKE	1	293376511421638.jpg	jpg
5009	0	5054	400000	722	2	0	4	0	2	Tell tayjer you saw this ad from DurianProperty to get best deal.New Freehold Residences in Between Mont Kiara & KL Metropolis ! [500m to MITEC MATRADE] IDEAL LAYOUT FOR OWNSTAY & INVESTMENT (2-4BEDROOMS/Dual Key unit Available) Tired of looking for affordable housing price in KL prime area ! This is it, this is YOUR GOLDEN OPPORTUNITY ! STARTING FROM 400K+ All 1st home buyers are welcome with ou…	Scenaria @ North Kiara Hills	Bukit Segambut	0	0	Scenaria @ North Kiara Hills, Bukit Segambut	3.18245	101.65	0	0	https://cdn.durianproperty.com.my/images/classified_ads/300310211708448.jpg	tell tayjer saw ad durianproperty get best deal new freehold residences mont kiara kl metropolis m mitec matrade ideal layout ownstay investment bedrooms dual key unit available tired looking affordable housing price kl prime area golden opportunity starting k st home buyers welcome exclusive rebates hoc free legal fees units come min carparks walking distance ktm mrt stations mins mont kiara hig…	tell tayjer saw ad durianproperti get best deal new freehold resid mont kiara kl metropoli m mitec matrad ideal layout ownstay invest bedroom dual key unit avail tire look afford hous price kl prime area golden opportun start k st home buyer welcom exclus rebat hoc free legal fee unit come min carpark walk distanc ktm mrt station min mont kiara high end residenti mint publika acr land freehold hi…	['tell', 'tayjer', 'saw', 'ad', 'durianproperti', 'get', 'best', 'deal', 'new', 'freehold', 'resid', 'mont', 'kiara', 'kl', 'metropoli', 'm', 'mitec', 'matrad', 'ideal', 'layout', 'ownstay', 'invest', 'bedroom', 'dual', 'key', 'unit', 'avail', 'tire', 'look', 'afford', 'hous', 'price', 'kl', 'prime', 'area', 'golden', 'opportun', 'start', 'k', 'st', 'home', 'buyer', 'welcom', 'exclus', 'rebat', '…	0	notfake	300310211708448.jpg	300310211708448	300310211708448.jpg	FAKE	1	300310211708448.jpg	jpg
5060	0	5105	400000	450	2	1	2	1	1	Tell Jac Ng you saw this ad from DurianProperty to get best deal.ÂÖ®ÂüéÁÉ≠Âçñ‰∏≠ ‚úÖ ‰Ωé‰∫éÂ∏Ç‰ª∑ You may view Taman Salak Selatan Profile here.	Taman Salak Selatan	Kuala Lumpur	1	0	Taman Salak Selatan, Kuala Lumpur	3.07896	101.694	0	0	https://cdn.durianproperty.com.my/images/classified_ads/300753711740140.jpg	tell jac ng saw ad durianproperty get best deal hot sale town market price may view taman salak selatan profile	tell jac ng saw ad durianproperti get best deal hot sale town market price may view taman salak selatan profil	['tell', 'jac', 'ng', 'saw', 'ad', 'durianproperti', 'get', 'best', 'deal', 'hot', 'sale', 'town', 'market', 'price', 'may', 'view', 'taman', 'salak', 'selatan', 'profil']	0	notfake	300753711740140.jpg	300753711740140	300753711740140.jpg	FAKE	1	300753711740140.jpg	jpg
5096	0	5142	1800000	3242	5	1	5	0	3	Tell Eunice Lim you saw this ad from DurianProperty to get best deal.Setia Eco Park Phase 7 Type : AMBER Brand New Semi D - Fully Renovated with Partially Furnished at Dry & Wet Kitchen - BU 3242 sf - LA 3498 sf - 4+1 Bedroom - 5 Bathroom Selling Price RM1.8 mil ==================================== For more details and viewing appointment please contact: Pm Eunice Lim ‚§µÔ∏è 016-2255 254 WhatsApp…	Setia Eco Park	Setia Alam	0	7	Setia Eco Park, Setia Alam	3.11209	101.477	0	0	https://cdn.durianproperty.com.my/images/classified_ads/301764111809810.jpeg	tell eunice lim saw ad durianproperty get best deal setia eco park phase type amber brand new semi fully renovated partially furnished dry wet kitchen bu sf la sf bedroom bathroom selling price rm mil details viewing appointment please contact pm eunice lim whatsapp agent wanted welcome join owner welcome list cover area klang shah alam property specialist area ambang botanic bandar puteri klang …	tell eunic lim saw ad durianproperti get best deal setia eco park phase type amber brand new semi fulli renov partial furnish dri wet kitchen bu sf la sf bedroom bathroom sell price rm mil detail view appoint pleas contact pm eunic lim whatsapp agent want welcom join owner welcom list cover area klang shah alam properti specialist area ambang botan bandar puteri klang bandar botan bukit tinggi ba…	['tell', 'eunic', 'lim', 'saw', 'ad', 'durianproperti', 'get', 'best', 'deal', 'setia', 'eco', 'park', 'phase', 'type', 'amber', 'brand', 'new', 'semi', 'fulli', 'renov', 'partial', 'furnish', 'dri', 'wet', 'kitchen', 'bu', 'sf', 'la', 'sf', 'bedroom', 'bathroom', 'sell', 'price', 'rm', 'mil', 'detail', 'view', 'appoint', 'pleas', 'contact', 'pm', 'eunic', 'lim', 'whatsapp', 'agent', 'want', 'wel…	0	notfake	301764111809810.jpeg	301764111809810	301764111809810.jpeg	FAKE	1	301764111809810.jpeg	jpeg
5161	0	5207	400000	850	2	2	3	0	2	Tell Thomes Ng you saw this ad from DurianProperty to get best deal.Iconic Building @ KL SETAPAK New launching & Latest condo !!!!! House with luxury hotel concept Freehold Dual key 650-1010 sf 2 / 3 / 4 rooms Affordable and Low entry price Whatsapp / Call 010-9026547 ( Thomes ) for more details & showroom viewing Whatsapp / Call 010-9026547 ( Thomes ) for more details & showroom viewing Whatsapp…	Kenwingston Platz Residence	Setapak	1	0	Kenwingston Platz Residence, Setapak	3.20963	101.718	0	0	https://cdn.durianproperty.com.my/images/classified_ads/300141711697103.jpeg	tell thomes ng saw ad durianproperty get best deal iconic building kl setapak new launching latest condo house luxury hotel concept freehold dual key sf rooms affordable low entry price whatsapp call thomes details showroom viewing whatsapp call thomes details showroom viewing whatsapp call thomes details showroom viewing whatsapp links star facilities sky lounge sky bridge sky garden km klcc bkt…	tell thome ng saw ad durianproperti get best deal icon build kl setapak new launch latest condo hous luxuri hotel concept freehold dual key sf room afford low entri price whatsapp call thome detail showroom view whatsapp call thome detail showroom view whatsapp call thome detail showroom view whatsapp link star facil sky loung sky bridg sky garden km klcc bkt bintang food heaven freehold appreci …	['tell', 'thome', 'ng', 'saw', 'ad', 'durianproperti', 'get', 'best', 'deal', 'icon', 'build', 'kl', 'setapak', 'new', 'launch', 'latest', 'condo', 'hous', 'luxuri', 'hotel', 'concept', 'freehold', 'dual', 'key', 'sf', 'room', 'afford', 'low', 'entri', 'price', 'whatsapp', 'call', 'thome', 'detail', 'showroom', 'view', 'whatsapp', 'call', 'thome', 'detail', 'showroom', 'view', 'whatsapp', 'call',…	0	notfake	300141711697103.jpeg	300141711697103	300141711697103.jpeg	FAKE	1	300141711697103.jpeg	jpeg
5272	0	5319	3568400	1114	2	2	2	0	1	Tell Gary Lok you saw this ad from DurianProperty to get best deal.Tropicana the Residences, KLCC is a luxury property that is located at the heart of the city. It is a great investment opportunity due to its ever-increasing market value as well as good rental returns. The property is also very appropriate for a high-class luxury lifestyle. It is located strategically at Jalan Ampang, Kuala Lumpu…	Tropicana The Residences	Kuala Lumpur	1	0	Tropicana The Residences, Kuala Lumpur	3.1586	101.709	0	0	https://cdn.durianproperty.com.my/images/classified_ads/300479711720167.jpg	tell gary lok saw ad durianproperty get best deal tropicana residences klcc luxury property located heart city great investment opportunity due ever increasing market value well good rental returns property also appropriate high class luxury lifestyle located strategically jalan ampang kuala lumpur property located heart capital city hence already significant advantage development many facilities…	tell gari lok saw ad durianproperti get best deal tropicana resid klcc luxuri properti locat heart citi great invest opportun due ever increas market valu well good rental return properti also appropri high class luxuri lifestyl locat strateg jalan ampang kuala lumpur properti locat heart capit citi henc alreadi signific advantag develop mani facil common yet somehow essenti facil well develop ma…	['tell', 'gari', 'lok', 'saw', 'ad', 'durianproperti', 'get', 'best', 'deal', 'tropicana', 'resid', 'klcc', 'luxuri', 'properti', 'locat', 'heart', 'citi', 'great', 'invest', 'opportun', 'due', 'ever', 'increas', 'market', 'valu', 'well', 'good', 'rental', 'return', 'properti', 'also', 'appropri', 'high', 'class', 'luxuri', 'lifestyl', 'locat', 'strateg', 'jalan', 'ampang', 'kuala', 'lumpur', 'pr…	0	notfake	300479711720167.jpg	300479711720167	300479711720167.jpg	FAKE	1	300479711720167.jpg	jpg
5276	0	5323	1350000	1378	4	2	3	0	2	Tell Shaun you saw this ad from DurianProperty to get best deal.Setia Sky Residences Location Strategically located in KL City within proximity of Intermark, Menara Celcom, Titiwangsa Park, IJN and KL Hospital, Setia Sky Residences is conveniently located in KL City Centre. Accesibility Easily accessible via Jalan Tun Razak and within stone‚Äôs throw away from Kampung Baru MRT2 Station which will…	Setia Sky Residences	KLCC	1	0	Setia Sky Residences, KLCC	3.16859	101.71	2	2	https://cdn.durianproperty.com.my/images/classified_ads/295383911375575.jpg	tell shaun saw ad durianproperty get best deal setia sky residences location strategically located kl city within proximity intermark menara celcom titiwangsa park ijn kl hospital setia sky residences conveniently located kl city centre accesibility easily accessible via jalan tun razak within stone throw away kampung baru mrt station operational end setia sky residences simply perfect property u…	tell shaun saw ad durianproperti get best deal setia sky resid locat strateg locat kl citi within proxim intermark menara celcom titiwangsa park ijn kl hospit setia sky resid conveni locat kl citi centr acces easili access via jalan tun razak within stone throw away kampung baru mrt station oper end setia sky resid simpli perfect properti urban dweller look simpl stylish conveni citi centr amen k…	['tell', 'shaun', 'saw', 'ad', 'durianproperti', 'get', 'best', 'deal', 'setia', 'sky', 'resid', 'locat', 'strateg', 'locat', 'kl', 'citi', 'within', 'proxim', 'intermark', 'menara', 'celcom', 'titiwangsa', 'park', 'ijn', 'kl', 'hospit', 'setia', 'sky', 'resid', 'conveni', 'locat', 'kl', 'citi', 'centr', 'acces', 'easili', 'access', 'via', 'jalan', 'tun', 'razak', 'within', 'stone', 'throw', 'awa…	0	notfake	295383911375575.jpg	295383911375575	295383911375575.jpg	FAKE	1	295383911375575.jpg	jpg
5301	0	5349	620000	1054	2	1	3	0	2	Tell Ivy Yew you saw this ad from DurianProperty to get best deal.FINAL BLOCK, LUXURY CONDO @ CYBERJAYA!!!! ## Sales Package * No legal spa and loan agreement * kitchen cabinet * 1st 50 units, with special gift * Inclusive 2 carpark and 2 air cond Grab it now.....!!!!!!! For further inquiry please contact Ivyyew at 012-2113 899 , > FREEHOLD High-end Condo in Cyberjaya < - size from 968sf : 3 bedr…	Lake Point Residences	Cyberjaya	7	0	Lake Point Residences, Cyberjaya	2.92945	101.634	0	1	https://cdn.durianproperty.com.my/images/classified_ads/287603010931788.JPG	tell ivy yew saw ad durianproperty get best deal final block luxury condo cyberjaya sales package legal spa loan agreement kitchen cabinet st units special gift inclusive carpark air cond grab inquiry please contact ivyyew freehold high end condo cyberjaya size sf bedrooms bathrooms low density units facilities surrounded million ringgit landed properties walking distance primary school sjkc unio…	tell ivi yew saw ad durianproperti get best deal final block luxuri condo cyberjaya sale packag legal spa loan agreement kitchen cabinet st unit special gift inclus carpark air cond grab inquiri pleas contact ivyyew freehold high end condo cyberjaya size sf bedroom bathroom low densiti unit facil surround million ringgit land properti walk distanc primari school sjkc union upcom life style mall m…	['tell', 'ivi', 'yew', 'saw', 'ad', 'durianproperti', 'get', 'best', 'deal', 'final', 'block', 'luxuri', 'condo', 'cyberjaya', 'sale', 'packag', 'legal', 'spa', 'loan', 'agreement', 'kitchen', 'cabinet', 'st', 'unit', 'special', 'gift', 'inclus', 'carpark', 'air', 'cond', 'grab', 'inquiri', 'pleas', 'contact', 'ivyyew', 'freehold', 'high', 'end', 'condo', 'cyberjaya', 'size', 'sf', 'bedroom', 'ba…	0	notfake	287603010931788.JPG	287603010931788	287603010931788.JPG	FAKE	1	287603010931788.JPG	JPG
5331	0	5379	125000	850	2	1	2	0	1	Tell Rin Rini you saw this ad from DurianProperty to get best deal.Level 1 Shop Apartment At Taman Putra Kajang PALING MURAHHHH GOOD FOR INVESTMENT OR OWN STAY!!! ================ Asking Price: Rm 125k Contact : Rin 013-9988035 PROPERTY DETAILS : - Freehold - Bumi Lot - Size: 850 sqft - 2 Bedrooms & 2 Bathrooms - Basic Unit - Level 1 - Tenanted (Rental RM650) NEARBY AMMENITIES: - Shoplot, Clinics…	Taman Putra Kajang	Kajang	0	0	Taman Putra Kajang, Kajang	2.97641	101.776	0	0	https://cdn.durianproperty.com.my/images/classified_ads/305134612046214.jpg	tell rin rini saw ad durianproperty get best deal level shop apartment taman putra kajang cheaph good investment stay asking price rm k contact rin property details freehold bumi lot size sqft bedrooms bathrooms basic unit level tenanted rental rm nearby ammenities shoplot clinics workshop ubudiyah islamic elementary school national school section islamic bank rhb bank maybank bsn ioi city mall s…	tell rin rini saw ad durianproperti get best deal level shop apart taman putra kajang cheaph good invest stay ask price rm k contact rin properti detail freehold bumi lot size sqft bedroom bathroom basic unit level tenant rental rm nearbi ammen shoplot clinic workshop ubudiyah islam elementari school nation school section islam bank rhb bank maybank bsn ioi citi mall serdang hospit kajang hospit …	['tell', 'rin', 'rini', 'saw', 'ad', 'durianproperti', 'get', 'best', 'deal', 'level', 'shop', 'apart', 'taman', 'putra', 'kajang', 'cheaph', 'good', 'invest', 'stay', 'ask', 'price', 'rm', 'k', 'contact', 'rin', 'properti', 'detail', 'freehold', 'bumi', 'lot', 'size', 'sqft', 'bedroom', 'bathroom', 'basic', 'unit', 'level', 'tenant', 'rental', 'rm', 'nearbi', 'ammen', 'shoplot', 'clinic', 'works…	0	notfake	305134612046214.jpg	305134612046214	305134612046214.jpg	FAKE	1	305134612046214.jpg	jpg
5341	0	5389	4000000	2178000	0	0	0	1	0	Tell Syaufi Borhnnudin you saw this ad from DurianProperty to get best deal.TANAH UNTUK DIJUAL !!! Di Bahau Negeri Sembilan, Tanaman Sawit & Pokok Kelapa Pandan ========================= SEEKAR : RM 80,000 HARGA KESEMUA : RM 4,000,000 ========================= OTHERS : Pondok Lembu Rumah persinggahan Rumah pekerja Kawasan Berpagar DETAILS : Tanah Seluas 50 Acree Tanah Pegangan Pajakan 99 Rezab Me…	Bahau	Negeri Sembilan	3	5	Bahau, Negeri Sembilan	2.8099	102.398	0	0	https://cdn.durianproperty.com.my/images/classified_ads/303923811960772.jpg	tell syaufi borhnnudin saw ad durianproperty get best deal land sale bahau negeri sembilan palm plant pandan coconut one acre rm total price rm others pondok lembu lodge guest house worker house fenced area details acre land leasehold malay reserve reserve road amenities km mainroad min pekan bahau call mohamad syaufi may view bahau profile	tell syaufi borhnnudin saw ad durianproperti get best deal land sale bahau negeri sembilan palm plant pandan coconut one acr rm total price rm other pondok lembu lodg guest hous worker hous fenc area detail acr land leasehold malay reserv reserv road amen km mainroad min pekan bahau call mohamad syaufi may view bahau profil	['tell', 'syaufi', 'borhnnudin', 'saw', 'ad', 'durianproperti', 'get', 'best', 'deal', 'land', 'sale', 'bahau', 'negeri', 'sembilan', 'palm', 'plant', 'pandan', 'coconut', 'one', 'acr', 'rm', 'total', 'price', 'rm', 'other', 'pondok', 'lembu', 'lodg', 'guest', 'hous', 'worker', 'hous', 'fenc', 'area', 'detail', 'acr', 'land', 'leasehold', 'malay', 'reserv', 'reserv', 'road', 'amen', 'km', 'mainro…	0	notfake	303923811960772.jpg	303923811960772	303923811960772.jpg	FAKE	1	303923811960772.jpg	jpg
5344	0	5392	175104	1000	2	0	3	0	1	Tell A Abang Zuhaili you saw this ad from DurianProperty to get best deal.RESIDENSI MELAKA TENGAH 2, MELAKA JANGAN LEPASKAN PELUANG!!! HARGA BERMULA RM 150,000!!! HARGA BAWAH RM 200,000!!! * 980 units * Dijangka siap awal tahun 2023 * Malay reserved Discount 20% HOC 10% Rebate 20% Booking RM500 sahaja - 1000 sqft - 3 bilik tidur + 2 bilik air + 1 stor - Balcony - Unit Privacy FASILITI: - Gated & …	Residensi Melaka Tengah 2	Melaka	9	0	Residensi Melaka Tengah 2, Melaka	2.21697	102.302	0	0	https://cdn.durianproperty.com.my/images/classified_ads/305148812047594.png	tell abang zuhaili saw ad durianproperty get best deal residensi melaka tengah melaka jangan lepaskan peluang harga bermula rm harga bawah rm units dijangka siap awal tahun malay reserved discount hoc rebate booking rm sahaja sqft bilik tidur bilik air stor balcony unit privacy fasiliti gated guarded cctv gym swimming pool cafe kindergarten surau badminton court multipurpose community hall medica…	tell abang zuhaili saw ad durianproperti get best deal residensi melaka tengah melaka jangan lepaskan peluang harga bermula rm harga bawah rm unit dijangka siap awal tahun malay reserv discount hoc rebat book rm sahaja sqft bilik tidur bilik air stor balconi unit privaci fasil gate guard cctv gym swim pool cafe kindergarten surau badminton court multipurpos commun hall medic center futsal court b…	['tell', 'abang', 'zuhaili', 'saw', 'ad', 'durianproperti', 'get', 'best', 'deal', 'residensi', 'melaka', 'tengah', 'melaka', 'jangan', 'lepaskan', 'peluang', 'harga', 'bermula', 'rm', 'harga', 'bawah', 'rm', 'unit', 'dijangka', 'siap', 'awal', 'tahun', 'malay', 'reserv', 'discount', 'hoc', 'rebat', 'book', 'rm', 'sahaja', 'sqft', 'bilik', 'tidur', 'bilik', 'air', 'stor', 'balconi', 'unit', 'priv…	0	notfake	305148812047594.png	305148812047594	305148812047594.png	FAKE	1	305148812047594.png	png
5350	0	5398	850000	2746	4	0	3	1	3	Tell MD RAZIF BIN MOHD SALIM you saw this ad from DurianProperty to get best deal.WTS : DOUBLE STOREY TOWNHOUSE PRIMER GARDEN TOWN VILLAS CAHAYA SPK SEKSYEN U9 SHAH ALAM ===================== ASKING PRICE : RM 850,000 ===================== PROPERTY DETAILS: Leasehold (Bumi Lot) Upper unit Land Area: 28 x 68 Built Up: 2,746sqft Bedrooms : 3 Bathrooms: 4 Kitchen Cabinet / Table Top Guarded & Gated …	Primer Garden Town Villas	Cahaya SPK	0	7	Primer Garden Town Villas, Cahaya SPK	3.14376	101.503	0	0	https://cdn.durianproperty.com.my/images/classified_ads/300612911729959.jpg	tell md razif bin mohd salim saw ad durianproperty get best deal wts double storey townhouse primer garden town villas cahaya spoke seksyen you shah alam asking price rm property details leasehold bumi lot upper unit land area x built sqft bedrooms bathrooms kitchen cabinet table top guarded gated clubhouse nearby amenities nearby shopping mall space you setia city mall nearby tesco extra tesco s…	tell md razif bin mohd salim saw ad durianproperti get best deal wt doubl storey townhous primer garden town villa cahaya spoke seksyen you shah alam ask price rm properti detail leasehold bumi lot upper unit land area x built sqft bedroom bathroom kitchen cabinet tabl top guard gate clubhous nearbi amen nearbi shop mall space you setia citi mall nearbi tesco extra tesco shah alam giant shah alam…	['tell', 'md', 'razif', 'bin', 'mohd', 'salim', 'saw', 'ad', 'durianproperti', 'get', 'best', 'deal', 'wt', 'doubl', 'storey', 'townhous', 'primer', 'garden', 'town', 'villa', 'cahaya', 'spoke', 'seksyen', 'you', 'shah', 'alam', 'ask', 'price', 'rm', 'properti', 'detail', 'leasehold', 'bumi', 'lot', 'upper', 'unit', 'land', 'area', 'x', 'built', 'sqft', 'bedroom', 'bathroom', 'kitchen', 'cabinet'…	0	notfake	300612911729959.jpg	300612911729959	300612911729959.jpg	FAKE	1	300612911729959.jpg	jpg
5363	0	5411	350000	1400	4	0	4	1	1	Tell christal phang you saw this ad from DurianProperty to get best deal.FASA 2 BUKA TEMPAH SEKARANG BULANAN DLM 1500++ UNIT TERHAD !!!!! *IPOH AREA KLEBANG DUA TINGKAT PERUMAHAN (KLEBANG) *20'x70' -1400sqft *4 bilik 4 bilik air Ôø•percuma automatik pintu Ôø•percuma peguaman yuran&duti setem Maklumat lanjut You may view Taman Klebang Emas Profile here.	Taman Klebang Emas	Ipoh	5	1	Taman Klebang Emas, Ipoh	4.673	101.106	0	0	https://cdn.durianproperty.com.my/images/classified_ads/305115012045477.jpg	tell christal phang saw ad durianproperty get best deal fasa buka tempah sekarang bulanan dlm unit terhad ipoh area klebang dua tingkat perumahan klebang x sqft bilik bilik air percuma automatik pintu percuma peguaman yuran duti setem maklumat lanjut may view taman klebang emas profile	tell christal phang saw ad durianproperti get best deal fasa buka tempah sekarang bulanan dlm unit terhad ipoh area klebang dua tingkat perumahan klebang x sqft bilik bilik air percuma automatik pintu percuma peguaman yuran duti setem maklumat lanjut may view taman klebang ema profil	['tell', 'christal', 'phang', 'saw', 'ad', 'durianproperti', 'get', 'best', 'deal', 'fasa', 'buka', 'tempah', 'sekarang', 'bulanan', 'dlm', 'unit', 'terhad', 'ipoh', 'area', 'klebang', 'dua', 'tingkat', 'perumahan', 'klebang', 'x', 'sqft', 'bilik', 'bilik', 'air', 'percuma', 'automatik', 'pintu', 'percuma', 'peguaman', 'yuran', 'duti', 'setem', 'maklumat', 'lanjut', 'may', 'view', 'taman', 'kleba…	0	notfake	305115012045477.jpg	305115012045477	305115012045477.jpg	FAKE	1	305115012045477.jpg	jpg
5364	0	5412	590000	2880	4	0	4	0	2	Tell Jacklyn Chiaa you saw this ad from DurianProperty to get best deal.Freehold Double Storey Terrace House ** Puchong ** # 24' √ó 75' # Built Up 2,880 sf # 4 Bedroom # 4 Bathroom Kindly call / whatsapp for more details Jacklyn : 019-694 5350You may view Bandar Bukit Puchong Profile here.	Bandar Bukit Puchong	Puchong	0	1	Bandar Bukit Puchong, Puchong	2.98803	101.619	0	0	https://cdn.durianproperty.com.my/images/classified_ads/303094711906203.jpg	tell jacklyn chiaa saw ad durianproperty get best deal freehold double storey terrace house puchong built sf bedroom bathroom kindly call whatsapp details jacklyn you may view bandar bukit puchong profile	tell jacklyn chiaa saw ad durianproperti get best deal freehold doubl storey terrac hous puchong built sf bedroom bathroom kindli call whatsapp detail jacklyn you may view bandar bukit puchong profil	['tell', 'jacklyn', 'chiaa', 'saw', 'ad', 'durianproperti', 'get', 'best', 'deal', 'freehold', 'doubl', 'storey', 'terrac', 'hous', 'puchong', 'built', 'sf', 'bedroom', 'bathroom', 'kindli', 'call', 'whatsapp', 'detail', 'jacklyn', 'you', 'may', 'view', 'bandar', 'bukit', 'puchong', 'profil']	0	notfake	303094711906203.jpg	303094711906203	303094711906203.jpg	FAKE	1	303094711906203.jpg	jpg
5475	0	5523	385000	770	2	1	3	0	2	Tell Ivy Yew you saw this ad from DurianProperty to get best deal.Developer release unit 0% downpayment with cash rebate ***Project Completed. Low down payment, Free legal SPA and Loan agreement. Discount..... ?? Grab it now.....!!!!!!! For Further inquiry please contact 012-2113 899 or Soho or Condo at Cyberjaya Cyber Bistari HYVE @ Cyberjaya Tenure : Freehold - just right behind Shaftsbury Squa…	Cyber Bistari HYVE	Cyberjaya	7	6	Cyber Bistari HYVE, Cyberjaya	2.92071	101.661	0	1	https://cdn.durianproperty.com.my/images/classified_ads/286709210886562.jpg	tell ivy yew saw ad durianproperty get best deal developer release unit downpayment cash rebate project completed low payment free legal spa loan agreement discount grab inquiry please contact soho condo cyberjaya cyber bistari hyve cyberjaya tenure freehold right behind shaftsbury square retail date completion july ready move facilities acres facilities include skyline view gym half court basket…	tell ivi yew saw ad durianproperti get best deal develop releas unit downpay cash rebat project complet low payment free legal spa loan agreement discount grab inquiri pleas contact soho condo cyberjaya cyber bistari hyve cyberjaya tenur freehold right behind shaftsburi squar retail date complet juli readi move facil acr facil includ skylin view gym half court basketbal lush jog trail bamboo gard…	['tell', 'ivi', 'yew', 'saw', 'ad', 'durianproperti', 'get', 'best', 'deal', 'develop', 'releas', 'unit', 'downpay', 'cash', 'rebat', 'project', 'complet', 'low', 'payment', 'free', 'legal', 'spa', 'loan', 'agreement', 'discount', 'grab', 'inquiri', 'pleas', 'contact', 'soho', 'condo', 'cyberjaya', 'cyber', 'bistari', 'hyve', 'cyberjaya', 'tenur', 'freehold', 'right', 'behind', 'shaftsburi', 'squ…	0	notfake	286709210886562.jpg	286709210886562	286709210886562.jpg	FAKE	1	286709210886562.jpg	jpg
5549	0	5597	98000	412	3	1	3	0	3	Tell MOHAMAD ZUL ARIF BIN SAAD you saw this ad from DurianProperty to get best deal.Projek Baru IFS Sri Iskandar Suite PELUANG MEMILIKI RUMAH PERTAMA DAN PELABURAN JANGKA MASA PANJANG Bayaran bulanan bermula dari RM360 * *sahaja Seri Iskandar Suite berkonsepkan SOHO (Office House) Lokasi : Sri Iskandar, Perak Saiz unit : 300kps, 312kps & 412kps Harga: Dari RM98,000 ke RM133,800 Kenapa di Sri Iska…	Seri Iskandar Business Centre	Perak	5	6	Seri Iskandar Business Centre, Perak	4.35904	100.985	0	0	https://cdn.durianproperty.com.my/images/classified_ads/301847311815839.png	tell mohamad zul arif bin saad saw ad durianproperty get best deal new project ifs sri iskandar suite opportunity first home long term investment monthly payment starts rm seri iskandar suite soho concept office house location sri iskandar perak unit size kps kps kps price rm rm sri iskandar perak m universiti teknologi petronas utp minutes km uitm sri iskandar minutes km ikbn sri iskandar minute…	tell mohamad zul arif bin saad saw ad durianproperti get best deal new project if sri iskandar suit opportun first home long term invest monthli payment start rm seri iskandar suit soho concept offic hous locat sri iskandar perak unit size kp kp kp price rm rm sri iskandar perak m univers teknolog petrona utp minut km uitm sri iskandar minut km ikbn sri iskandar minut km fire station minut km tes…	['tell', 'mohamad', 'zul', 'arif', 'bin', 'saad', 'saw', 'ad', 'durianproperti', 'get', 'best', 'deal', 'new', 'project', 'if', 'sri', 'iskandar', 'suit', 'opportun', 'first', 'home', 'long', 'term', 'invest', 'monthli', 'payment', 'start', 'rm', 'seri', 'iskandar', 'suit', 'soho', 'concept', 'offic', 'hous', 'locat', 'sri', 'iskandar', 'perak', 'unit', 'size', 'kp', 'kp', 'kp', 'price', 'rm', 'r…	0	notfake	301847311815839.png	301847311815839	301847311815839.png	FAKE	1	301847311815839.png	png
5550	0	5598	800000	1149	2	2	2	0	2	Tell Lee Chin (REN13516) you saw this ad from DurianProperty to get best deal.EkoCheras @ Taman Mutiara Barat * Duplex * Hi floor * Corner Unit * Built up 1150sf * 2 room 2 bath * Fully renovated * Fully furnished * With balcony * City view * Comes with 2 car parks * Walking distance to MRT Taman Mutiara Facilities : - Swimming Pool - Gymnasium - Children\'s Playground - Multi-Purpose Hall - 24 H…	Eko Cheras	Cheras	0	0	Eko Cheras, Cheras	3.09268	101.739	0	1	https://cdn.durianproperty.com.my/images/classified_ads/302310411850739.jpg	tell lee chin ren saw ad durianproperty get best deal ekocheras taman mutiara barat duplex hi floor corner unit built sf room bath fully renovated fully furnished balcony city view comes car parks walking distance mrt taman mutiara facilities swimming pool gymnasium children playground multi purpose hall hour security amenities cheras leisure mall tesco taman midah ucsi university sjkc taman conn…	tell lee chin ren saw ad durianproperti get best deal ekochera taman mutiara barat duplex hi floor corner unit built sf room bath fulli renov fulli furnish balconi citi view come car park walk distanc mrt taman mutiara facil swim pool gymnasium children playground multi purpos hall hour secur amen chera leisur mall tesco taman midah ucsi univers sjkc taman connaught smk seri mutiara access jalan …	['tell', 'lee', 'chin', 'ren', 'saw', 'ad', 'durianproperti', 'get', 'best', 'deal', 'ekochera', 'taman', 'mutiara', 'barat', 'duplex', 'hi', 'floor', 'corner', 'unit', 'built', 'sf', 'room', 'bath', 'fulli', 'renov', 'fulli', 'furnish', 'balconi', 'citi', 'view', 'come', 'car', 'park', 'walk', 'distanc', 'mrt', 'taman', 'mutiara', 'facil', 'swim', 'pool', 'gymnasium', 'children', 'playground', '…	1	fake	302310411850739.jpg	302310411850739	302310411850739.jpg	FAKE	1	302310411850739.jpg	jpg
5719	0	5769	164100	1098	2	0	3	1	0	Tell Nicholes you saw this ad from DurianProperty to get best deal.************************************************************** Bank Lelong -34% The Residence @ Kampar, Bandar Agacia, Kampar ************************************************************** Alamat : 88-2, Block 88, Aras 2, The Residence @ Kampar, Persiaran Residensi, Bandar Agacia, 31910 Kampar, Perak * Lelong price : RM 164,100 * …	The Residence	Kampar	5	7	The Residence, Kampar	4.3212	101.123	0	1	https://cdn.durianproperty.com.my/images/classified_ads/304680112014029.jpg	tell nicholes saw ad durianproperty get best deal bank lelong residence kampar bandar agacia kampar alamat block aras residence kampar persiaran residensi bandar agacia kampar perak lelong price rm market value rm tarikg lelong september property details level townhouse built sf chinese owner leasehold photographs shown herein solely general identification reference purpose intended form part con…	tell nichol saw ad durianproperti get best deal bank lelong resid kampar bandar agacia kampar alamat block ara resid kampar persiaran residensi bandar agacia kampar perak lelong price rm market valu rm tarikg lelong septemb properti detail level townhous built sf chines owner leasehold photograph shown herein sole gener identif refer purpos intend form part contract warranti registr untuk daftar …	['tell', 'nichol', 'saw', 'ad', 'durianproperti', 'get', 'best', 'deal', 'bank', 'lelong', 'resid', 'kampar', 'bandar', 'agacia', 'kampar', 'alamat', 'block', 'ara', 'resid', 'kampar', 'persiaran', 'residensi', 'bandar', 'agacia', 'kampar', 'perak', 'lelong', 'price', 'rm', 'market', 'valu', 'rm', 'tarikg', 'lelong', 'septemb', 'properti', 'detail', 'level', 'townhous', 'built', 'sf', 'chines', '…	0	notfake	304680112014029.jpg	304680112014029	304680112014029.jpg	FAKE	1	304680112014029.jpg	jpg
5819	0	5870	2557727	915	2	2	4	0	1	Tell Tiffany Tang you saw this ad from DurianProperty to get best deal.Luxury Service Residence @ KLCC with Monthly Income Guaranteed !! (for 36 months!) ~~~~~~~~~~~~~~~~~~~~~~~~ * Limited Time: Get up to RM10K per month \\\'Income\\\' for 36 months! * For Own Stay or rental! It\\\'s YOUR Choice! (You will still get your monthly Income) * Low Booking Fee! * Don\\\'t Miss This Opportunity! CALL TO…	The Ruma	KLCC	1	0	The Ruma, KLCC	3.15275	101.714	0	0	https://cdn.durianproperty.com.my/images/classified_ads/295379811701150.jpg	tell tiffany tang saw ad durianproperty get best deal luxury service residence klcc monthly income guaranteed months limited time get rmk per month income months stay rental choice still get monthly income low booking fee miss opportunity call today private viewing focus luxury residential commercial space office retail leasing areas include klcc cbd kl city pj parts klang l free contact tiffany …	tell tiffani tang saw ad durianproperti get best deal luxuri servic resid klcc monthli incom guarante month limit time get rmk per month incom month stay rental choic still get monthli incom low book fee miss opportun call today privat view focu luxuri residenti commerci space offic retail leas area includ klcc cbd kl citi pj part klang l free contact tiffani ren whassap g inquiri offic space pro…	['tell', 'tiffani', 'tang', 'saw', 'ad', 'durianproperti', 'get', 'best', 'deal', 'luxuri', 'servic', 'resid', 'klcc', 'monthli', 'incom', 'guarante', 'month', 'limit', 'time', 'get', 'rmk', 'per', 'month', 'incom', 'month', 'stay', 'rental', 'choic', 'still', 'get', 'monthli', 'incom', 'low', 'book', 'fee', 'miss', 'opportun', 'call', 'today', 'privat', 'view', 'focu', 'luxuri', 'residenti', 'co…	0	notfake	295379811701150.jpg	295379811701150	295379811701150.jpg	FAKE	1	295379811701150.jpg	jpg
5828	0	5879	80000	269	1	2	2	1	3	Tell Chris ( Property Seremban ) you saw this ad from DurianProperty to get best deal.Limited unit for NON bumi UTAR Student Apartment Real Estate Investment Plan RM80,000 ++ =========================== Please WhatsApp 012-357 5385 ========================== UTAR Student Apartment Real Investment RM80,000 ++ Kampar ,Perak IpohYou may view Perak Profile here.	Perak	Malaysia	5	0	Perak, Malaysia	4.80729	100.8	0	0	https://cdn.durianproperty.com.my/images/classified_ads/304299111989798.jpg	tell chris property seremban saw ad durianproperty get best deal limited unit non bumi utar student apartment real estate investment plan rm please whatsapp utar student apartment real investment rm kampar perak ipohyou may view perak profile	tell chri properti seremban saw ad durianproperti get best deal limit unit non bumi utar student apart real estat invest plan rm pleas whatsapp utar student apart real invest rm kampar perak ipohy may view perak profil	['tell', 'chri', 'properti', 'seremban', 'saw', 'ad', 'durianproperti', 'get', 'best', 'deal', 'limit', 'unit', 'non', 'bumi', 'utar', 'student', 'apart', 'real', 'estat', 'invest', 'plan', 'rm', 'pleas', 'whatsapp', 'utar', 'student', 'apart', 'real', 'invest', 'rm', 'kampar', 'perak', 'ipohy', 'may', 'view', 'perak', 'profil']	0	notfake	304299111989798.jpg	304299111989798	304299111989798.jpg	FAKE	1	304299111989798.jpg	jpg
5851	0	5902	867000	3537	5	0	7	0	3	You may view Taman Skudai Baru Profile here.	Taman Skudai Baru	Skudai	2	7	Taman Skudai Baru, Skudai	1.51022	103.645	0	0	https://cdn.durianproperty.com.my/images/classified_ads/303378411925271.jpeg	may view taman skudai baru profile	may view taman skudai baru profil	['may', 'view', 'taman', 'skudai', 'baru', 'profil']	0	notfake	303378411925271.jpeg	303378411925271	303378411925271.jpeg	FAKE	1	303378411925271.jpeg	jpeg
5853	0	5904	388000	1100	2	2	3	1	1	Tell Roy Lim you saw this ad from DurianProperty to get best deal.Ampang area specialist, many unit for sale and rent. Call 016-2335550 to know more info. Prime location with very good for own stay or investment. Immediately call 016-2335550 One Ampang Avenue is surrounded by amenities with just mere minutes away from offices, shopping centers, entertainments spots, restaurants, schools, LRT stat…	One Ampang Avenue	Ampang	1	0	One Ampang Avenue, Ampang	3.15487	101.752	1	1	https://cdn.durianproperty.com.my/images/classified_ads/302326411851901.jpg	tell roy lim saw ad durianproperty get best deal ampang area specialist many unit sale rent call know info prime location good stay investment immediately call one ampang avenue surrounded amenities mere minutes away offices shopping centers entertainments spots restaurants schools lrt stations bus taxi stands golf course embassies hotels hospitals banks conveniently located opposite ampang point…	tell roy lim saw ad durianproperti get best deal ampang area specialist mani unit sale rent call know info prime locat good stay invest immedi call one ampang avenu surround amen mere minut away offic shop center entertain spot restaur school lrt station bu taxi stand golf cours embassi hotel hospit bank conveni locat opposit ampang point shop complex within area korean villag take minut drive ku…	['tell', 'roy', 'lim', 'saw', 'ad', 'durianproperti', 'get', 'best', 'deal', 'ampang', 'area', 'specialist', 'mani', 'unit', 'sale', 'rent', 'call', 'know', 'info', 'prime', 'locat', 'good', 'stay', 'invest', 'immedi', 'call', 'one', 'ampang', 'avenu', 'surround', 'amen', 'mere', 'minut', 'away', 'offic', 'shop', 'center', 'entertain', 'spot', 'restaur', 'school', 'lrt', 'station', 'bu', 'taxi', …	0	notfake	302326411851901.jpg	302326411851901	302326411851901.jpg	FAKE	1	302326411851901.jpg	jpg
5863	0	5914	348000	1800	3	0	4	0	2	You may view Taman Pusing Baru Profile here.	Taman Pusing Baru	Pusing	5	1	Taman Pusing Baru, Pusing	4.48492	101.015	0	0	https://cdn.durianproperty.com.my/images/classified_ads/304127411974926.jpg	may view taman pusing baru profile	may view taman puse baru profil	['may', 'view', 'taman', 'puse', 'baru', 'profil']	0	notfake	304127411974926.jpg	304127411974926	304127411974926.jpg	FAKE	1	304127411974926.jpg	jpg
5965	0	6017	1300000	3688	5	1	5	0	3	Tell Christopher Yan you saw this ad from DurianProperty to get best deal.***3 Storey Semi D For Sale*** -Bina Park, Seri Alam -Freehold -Intermediate Lot -35\\\' x 100\\\' -5 Bedrooms 5 Bathrooms -Partially Furnished -Renovated Unit -Kitchen Already Fully Extend -24 Hours Gated & Guarded -RM1.3mil Please Call Chris @ For Further Information.Please see more of my listings at http://christopher_ya…	Bandar Seri Alam	Masai	2	2	Bandar Seri Alam, Masai	1.50572	103.874	0	0	https://cdn.durianproperty.com.my/images/classified_ads/304121411974371.png	tell christopher yan saw ad durianproperty get best deal storey semi sale bina park seri alam freehold intermediate lot x bedrooms bathrooms partially furnished renovated unit kitchen already fully extend hours gated guarded rm mil please call chris information please see listings may view bandar seri alam profile	tell christoph yan saw ad durianproperti get best deal storey semi sale bina park seri alam freehold intermedi lot x bedroom bathroom partial furnish renov unit kitchen alreadi fulli extend hour gate guard rm mil pleas call chri inform pleas see list may view bandar seri alam profil	['tell', 'christoph', 'yan', 'saw', 'ad', 'durianproperti', 'get', 'best', 'deal', 'storey', 'semi', 'sale', 'bina', 'park', 'seri', 'alam', 'freehold', 'intermedi', 'lot', 'x', 'bedroom', 'bathroom', 'partial', 'furnish', 'renov', 'unit', 'kitchen', 'alreadi', 'fulli', 'extend', 'hour', 'gate', 'guard', 'rm', 'mil', 'pleas', 'call', 'chri', 'inform', 'pleas', 'see', 'list', 'may', 'view', 'banda…	0	notfake	304121411974371.png	304121411974371	304121411974371.png	FAKE	1	304121411974371.png	png
5973	0	6025	288000	861	2	0	3	1	2	Tell Mohamad Abdul Muiz you saw this ad from DurianProperty to get best deal.U15 Shah Alam Just Completed ‚ÄºÔ∏è ‚ÄºÔ∏è TownHouse - RM288k net ‚ÄºÔ∏è ‚ÄºÔ∏è -Built Up : 30 x 42You may view U15 Profile here.	U15	Shah Alam	0	7	U15, Shah Alam	3.17761	101.462	0	0	https://cdn.durianproperty.com.my/images/classified_ads/305053112040676.jpg	tell mohamad abdul muiz saw ad durianproperty get best deal you shah alam completed townhouse rmk net built x you may view you profile	tell mohamad abdul muiz saw ad durianproperti get best deal you shah alam complet townhous rmk net built x you may view you profil	['tell', 'mohamad', 'abdul', 'muiz', 'saw', 'ad', 'durianproperti', 'get', 'best', 'deal', 'you', 'shah', 'alam', 'complet', 'townhous', 'rmk', 'net', 'built', 'x', 'you', 'may', 'view', 'you', 'profil']	0	notfake	305053112040676.jpg	305053112040676	305053112040676.jpg	FAKE	1	305053112040676.jpg	jpg
5994	0	6046	439000	1150	2	0	4	0	2	You may view Olak Lempit Profile here.	Olak Lempit	Banting	0	2	Olak Lempit, Banting	2.83525	101.595	2	0	https://cdn.durianproperty.com.my/images/classified_ads/305021712037972.jpg	may view olak lempit profile	may view olak lempit profil	['may', 'view', 'olak', 'lempit', 'profil']	0	notfake	305021712037972.jpg	305021712037972	305021712037972.jpg	FAKE	1	305021712037972.jpg	jpg
6043	0	6097	328000	962	2	2	3	1	1	Tell Lum you saw this ad from DurianProperty to get best deal.Fully furnished: -Kitchen cabinet -Built-in wardrobe -Kitchen and bathroom full wall tiles -Living room & bed rooms floor tiles -Water heater -Air-cond -Mosquito net -KLCC & Genting viewYou may view Grandeur Tower Profile here.	Grandeur Tower	Pandan	1	0	Grandeur Tower, Pandan	3.13004	101.75	0	0	https://cdn.durianproperty.com.my/images/classified_ads/298040611557979.jpg	tell lum saw ad durianproperty get best deal fully furnished kitchen cabinet built wardrobe kitchen bathroom full wall tiles living room bed rooms floor tiles water heater air cond mosquito net klcc genting viewyou may view grandeur tower profile	tell lum saw ad durianproperti get best deal fulli furnish kitchen cabinet built wardrob kitchen bathroom full wall tile live room bed room floor tile water heater air cond mosquito net klcc gent viewyou may view grandeur tower profil	['tell', 'lum', 'saw', 'ad', 'durianproperti', 'get', 'best', 'deal', 'fulli', 'furnish', 'kitchen', 'cabinet', 'built', 'wardrob', 'kitchen', 'bathroom', 'full', 'wall', 'tile', 'live', 'room', 'bed', 'room', 'floor', 'tile', 'water', 'heater', 'air', 'cond', 'mosquito', 'net', 'klcc', 'gent', 'viewyou', 'may', 'view', 'grandeur', 'tower', 'profil']	0	notfake	298040611557979.jpg	298040611557979	298040611557979.jpg	FAKE	1	298040611557979.jpg	jpg
6065	0	6119	380000	757	2	1	3	1	1	Tell Ocean Choong Sen Xuan you saw this ad from DurianProperty to get best deal.3Bedroom price only RM380K Walking Distance to MRT Station Door Step to Shoping Mall 4Star Hotel by Marriott Group next to your home Dedicated fly over from LDP Highway to your home 0% Down Payment Free All Legal Fees Monthly Installment RM1,500You may view Taman Equine Profile here.	Taman Equine	Seri Kembangan	0	0	Taman Equine, Seri Kembangan	3.00302	101.679	0	0	https://cdn.durianproperty.com.my/images/classified_ads/303797711953470.png	tell ocean choong sen xuan saw ad durianproperty get best deal bedroom price rmk walking distance mrt station door step shoping mall star hotel marriott group next home dedicated fly ldp highway home payment free legal fees monthly installment rm you may view taman equine profile	tell ocean choong sen xuan saw ad durianproperti get best deal bedroom price rmk walk distanc mrt station door step shope mall star hotel marriott group next home dedic fli ldp highway home payment free legal fee monthli instal rm you may view taman equin profil	['tell', 'ocean', 'choong', 'sen', 'xuan', 'saw', 'ad', 'durianproperti', 'get', 'best', 'deal', 'bedroom', 'price', 'rmk', 'walk', 'distanc', 'mrt', 'station', 'door', 'step', 'shope', 'mall', 'star', 'hotel', 'marriott', 'group', 'next', 'home', 'dedic', 'fli', 'ldp', 'highway', 'home', 'payment', 'free', 'legal', 'fee', 'monthli', 'instal', 'rm', 'you', 'may', 'view', 'taman', 'equin', 'profil…	0	notfake	303797711953470.png	303797711953470	303797711953470.png	FAKE	1	303797711953470.png	png
6070	0	6124	468000	1200	3	0	4	1	2	Tell Thomes Ng you saw this ad from DurianProperty to get best deal.Eco Green Concept Condominium Located between Wangsa Maju and Melawati Pre Launch Phase Now !!! To Grab More Early Bird Package, please click links below: ++ Why M Adora ++ --------------------------- ‚Ä¢ Free Bus to LRT Sri Rampai [ Saves petrol cost and time ] ‚Ä¢ Luxury Concept Design [ Start from only RM468K ] ‚Ä¢ Non Blocked…	M Adora	Taman Wangsa Melawati	0	0	M Adora, Taman Wangsa Melawati	3.20431	101.746	0	0	https://cdn.durianproperty.com.my/images/classified_ads/300178511699599.jpeg	tell thomes ng saw ad durianproperty get best deal eco green concept condominium located wangsa maju melawati pre launch phase grab early bird package please click links adora free bus lrt sri rampai saves petrol cost time luxury concept design start rmk non blocked view surrounded landed house different type access road kl city centre smooth traffic residential title shoplot strangers allowed ex…	tell thome ng saw ad durianproperti get best deal eco green concept condominium locat wangsa maju melawati pre launch phase grab earli bird packag pleas click link adora free bu lrt sri rampai save petrol cost time luxuri concept design start rmk non block view surround land hous differ type access road kl citi centr smooth traffic residenti titl shoplot stranger allow except visitor registr elec…	['tell', 'thome', 'ng', 'saw', 'ad', 'durianproperti', 'get', 'best', 'deal', 'eco', 'green', 'concept', 'condominium', 'locat', 'wangsa', 'maju', 'melawati', 'pre', 'launch', 'phase', 'grab', 'earli', 'bird', 'packag', 'pleas', 'click', 'link', 'adora', 'free', 'bu', 'lrt', 'sri', 'rampai', 'save', 'petrol', 'cost', 'time', 'luxuri', 'concept', 'design', 'start', 'rmk', 'non', 'block', 'view', '…	0	notfake	300178511699599.jpeg	300178511699599	300178511699599.jpeg	FAKE	1	300178511699599.jpeg	jpeg
6077	0	6131	7000000	396396	0	0	0	0	0	Tell sc sam you saw this ad from DurianProperty to get best deal.Agriculture land with a resort house for sale *9.1 acres *Resort house 45x60 *2.5 storey *7 rooms *Have fish pond *Around 50 musang king durian trees 3 years old *Around 50 other durian trees *Fruits plantations with coconut, Mango, starfruits , cempedak, pineapple, maggis, longan, ciku.You may view Bentong Profile here.	Bentong	Pahang	8	5	Bentong, Pahang	3.52217	101.91	0	0	https://cdn.durianproperty.com.my/images/classified_ads/302174811839718.PNG	tell sc sam saw ad durianproperty get best deal agriculture land resort house sale acres resort house x storey rooms fish pond around musang king durian trees years old around durian trees fruits plantations coconut mango starfruits cempedak pineapple maggis longan ciku may view bentong profile	tell sc sam saw ad durianproperti get best deal agricultur land resort hous sale acr resort hous x storey room fish pond around musang king durian tree year old around durian tree fruit plantat coconut mango starfruit cempedak pineappl maggi longan ciku may view bentong profil	['tell', 'sc', 'sam', 'saw', 'ad', 'durianproperti', 'get', 'best', 'deal', 'agricultur', 'land', 'resort', 'hous', 'sale', 'acr', 'resort', 'hous', 'x', 'storey', 'room', 'fish', 'pond', 'around', 'musang', 'king', 'durian', 'tree', 'year', 'old', 'around', 'durian', 'tree', 'fruit', 'plantat', 'coconut', 'mango', 'starfruit', 'cempedak', 'pineappl', 'maggi', 'longan', 'ciku', 'may', 'view', 'be…	0	notfake	302174811839718.PNG	302174811839718	302174811839718.PNG	FAKE	1	302174811839718.PNG	PNG
6094	0	6148	3267000	43560	0	0	0	1	0	Tell Williamproperty89 you saw this ad from DurianProperty to get best deal.1 acre agriculture land at subang new village for sale or rental. Sales - RM 75/ sq ft Rental - RM 0.40/ sq ft >Lease expiring 2077 >Solid land, fence up > opposite land is existing big factory (E&W Engineering) >Dimension for 1 acre is 90' x 480' & 2 acre is 180' x 480' >The current title is 2 acres, buyer can buy 1-2 ac…	Sungai Buloh	Selangor	0	5	Sungai Buloh, Selangor	3.20933	101.561	0	0	https://cdn.durianproperty.com.my/images/classified_ads/302413411858910.png	tell williamproperty saw ad durianproperty get best deal acre agriculture land subang new village sale rental sales rm sq ft rental rm sq ft lease expiring solid land fence opposite land existing big factory e w engineering dimension acre x acre x current title acres buyer buy acres buying acre sub division contact william info you may view sungai buloh profile	tell williamproperti saw ad durianproperti get best deal acr agricultur land subang new villag sale rental sale rm sq ft rental rm sq ft leas expir solid land fenc opposit land exist big factori e w engin dimens acr x acr x current titl acr buyer buy acr buy acr sub divis contact william info you may view sungai buloh profil	['tell', 'williamproperti', 'saw', 'ad', 'durianproperti', 'get', 'best', 'deal', 'acr', 'agricultur', 'land', 'subang', 'new', 'villag', 'sale', 'rental', 'sale', 'rm', 'sq', 'ft', 'rental', 'rm', 'sq', 'ft', 'leas', 'expir', 'solid', 'land', 'fenc', 'opposit', 'land', 'exist', 'big', 'factori', 'e', 'w', 'engin', 'dimens', 'acr', 'x', 'acr', 'x', 'current', 'titl', 'acr', 'buyer', 'buy', 'acr',…	0	notfake	302413411858910.png	302413411858910	302413411858910.png	FAKE	1	302413411858910.png	png
6097	0	6151	628550	12572	3	0	3	1	3	Tell effendy shohaili you saw this ad from DurianProperty to get best deal.FOR SALE BANGLO LOT JALAN UTAMA KG MELAYU MAJIDEE JOHOR BAHRU ASKING PRICE RM 628,550.00 Specifications: Leasehold Bumi Land area 12,571 sqft Individual title 1 owner RM50.00 per sqft 3 door rented houses Accessibilities: Via Jalan Utama Tebrau Highway Jalan Pandan PLUS Highway EDL For more info or viewing session, please …	Johor Bahru	Johor	2	5	Johor Bahru, Johor	1.49266	103.741	1	0	https://cdn.durianproperty.com.my/images/classified_ads/302974411898268.jpg	tell effendy shohaili saw ad durianproperty get best deal sale banglo lot jalan utama kg melayu majidee johor bahru asking price rm specifications leasehold bumi land area sqft individual title owner rm per sqft door rented houses accessibilities via jalan utama tebrau highway jalan pandan plus highway edl info viewing session please contact effendy shohaili ren prima hartanah consultant sb may v…	tell effendi shohaili saw ad durianproperti get best deal sale banglo lot jalan utama kg melayu majide johor bahru ask price rm specif leasehold bumi land area sqft individu titl owner rm per sqft door rent hous access via jalan utama tebrau highway jalan pandan plu highway edl info view session pleas contact effendi shohaili ren prima hartanah consult sb may view johor bahru profil	['tell', 'effendi', 'shohaili', 'saw', 'ad', 'durianproperti', 'get', 'best', 'deal', 'sale', 'banglo', 'lot', 'jalan', 'utama', 'kg', 'melayu', 'majide', 'johor', 'bahru', 'ask', 'price', 'rm', 'specif', 'leasehold', 'bumi', 'land', 'area', 'sqft', 'individu', 'titl', 'owner', 'rm', 'per', 'sqft', 'door', 'rent', 'hous', 'access', 'via', 'jalan', 'utama', 'tebrau', 'highway', 'jalan', 'pandan', …	0	notfake	302974411898268.jpg	302974411898268	302974411898268.jpg	FAKE	1	302974411898268.jpg	jpg
6109	0	6163	400000	1000	2	2	3	0	2	Tell Alice Tan you saw this ad from DurianProperty to get best deal.Branded Develepor Project Freehold Condo @ Kepong ONLY RM400K ***Negotiable*** ‚ÄºÔ∏èBELOW MARKET VALUE‚ÄºÔ∏è 751 sqft - 1200 sqft (4 Room & 2 Bath) Low Density Below Market Value Directly Facing the Pool 2 CarParks Easy Accessibility 10 Min to Pavilion 15 Min to Midvalley 10 Min to KLCC Promotion Package:- 0% Downpayment CashBac…	Solaris Mont Kiara	Mont Kiara	0	0	Solaris Mont Kiara, Mont Kiara	3.17637	101.66	0	0	https://cdn.durianproperty.com.my/images/classified_ads/300384111713267.jpg	tell alice tan saw ad durianproperty get best deal branded develepor project freehold condo kepong rmk negotiable market value sqft sqft room bath low density market value directly facing pool carparks easy accessibility min pavilion min midvalley min klcc promotion package downpayment cashback free loan legal fee free loan stamping duty free spa legal fee free spa stamping duty free mot booking …	tell alic tan saw ad durianproperti get best deal brand develepor project freehold condo kepong rmk negoti market valu sqft sqft room bath low densiti market valu directli face pool carpark easi access min pavilion min midvalley min klcc promot packag downpay cashback free loan legal fee free loan stamp duti free spa legal fee free spa stamp duti free mot book fee rm rmk negoti market valu contac…	['tell', 'alic', 'tan', 'saw', 'ad', 'durianproperti', 'get', 'best', 'deal', 'brand', 'develepor', 'project', 'freehold', 'condo', 'kepong', 'rmk', 'negoti', 'market', 'valu', 'sqft', 'sqft', 'room', 'bath', 'low', 'densiti', 'market', 'valu', 'directli', 'face', 'pool', 'carpark', 'easi', 'access', 'min', 'pavilion', 'min', 'midvalley', 'min', 'klcc', 'promot', 'packag', 'downpay', 'cashback', …	0	notfake	300384111713267.jpg	300384111713267	300384111713267.jpg	FAKE	1	300384111713267.jpg	jpg
6125	0	6179	350000	900	2	0	3	0	2	Tell Oreena you saw this ad from DurianProperty to get best deal.3 BEDROOMS, 2 BATHS APARTMENT THE PROPERTY :- Urban community home with 3 tier security, clubhouse, and commercial units. :- Offers a closed kitchen and living hall area, very rare in an apartment development nowadays. :- Full-fledge condominium facilities. :- Zero booking fees. :- Surrounded by high-end residential developments. :-…	Cyber 10	Cyberjaya	7	0	Cyber 10, Cyberjaya	2.90404	101.642	0	0	https://cdn.durianproperty.com.my/images/classified_ads/300617211730283.jpg	tell oreena saw ad durianproperty get best deal bedrooms baths apartment property urban community home tier security clubhouse commercial units offers closed kitchen living hall area rare apartment development nowadays full fledge condominium facilities zero booking fees surrounded high end residential developments easy access major highways key facts bedrooms baths side side car park bays sqft t…	tell oreena saw ad durianproperti get best deal bedroom bath apart properti urban commun home tier secur clubhous commerci unit offer close kitchen live hall area rare apart develop nowaday full fledg condominium facil zero book fee surround high end residenti develop easi access major highway key fact bedroom bath side side car park bay sqft target handov quarter sale packag offer cashback spa s…	['tell', 'oreena', 'saw', 'ad', 'durianproperti', 'get', 'best', 'deal', 'bedroom', 'bath', 'apart', 'properti', 'urban', 'commun', 'home', 'tier', 'secur', 'clubhous', 'commerci', 'unit', 'offer', 'close', 'kitchen', 'live', 'hall', 'area', 'rare', 'apart', 'develop', 'nowaday', 'full', 'fledg', 'condominium', 'facil', 'zero', 'book', 'fee', 'surround', 'high', 'end', 'residenti', 'develop', 'ea…	0	notfake	300617211730283.jpg	300617211730283	300617211730283.jpg	FAKE	1	300617211730283.jpg	jpg
6146	0	6200	297000	962	2	0	3	0	3	Tell Hazman you saw this ad from DurianProperty to get best deal.Residensi KLIA, Nilai Good Attractive Packages Freehold service Apartment Completion year 2021 5.4 acres land sizes 14 retail shops at ground floor 5 floors car parks Total 31 floors Height ceiling 9\' Total Block A & B (total 600 unit ) Now selling Block A (85% sold) Facility Facilities at 6th floor Maintenance fees 0.15 psf exclud…	KLIA Residences	Nilai	3	0	KLIA Residences, Nilai	2.77078	101.764	0	0	https://cdn.durianproperty.com.my/images/classified_ads/298013411556044.jpg	tell hazman saw ad durianproperty get best deal residensi klia nilai good attractive packages freehold service apartment completion year acres land sizes retail shops ground floor floors car parks total floors height ceiling total block b total unit selling block sold facility facilities th floor maintenance fees psf excludes sinking fund hour security cctv access card intercom type corner unit s…	tell hazman saw ad durianproperti get best deal residensi klia nilai good attract packag freehold servic apart complet year acr land size retail shop ground floor floor car park total floor height ceil total block b total unit sell block sold facil facil th floor mainten fee psf exclud sink fund hour secur cctv access card intercom type corner unit size sqft room bath rmk intermedi unit size sqft…	['tell', 'hazman', 'saw', 'ad', 'durianproperti', 'get', 'best', 'deal', 'residensi', 'klia', 'nilai', 'good', 'attract', 'packag', 'freehold', 'servic', 'apart', 'complet', 'year', 'acr', 'land', 'size', 'retail', 'shop', 'ground', 'floor', 'floor', 'car', 'park', 'total', 'floor', 'height', 'ceil', 'total', 'block', 'b', 'total', 'unit', 'sell', 'block', 'sold', 'facil', 'facil', 'th', 'floor',…	0	notfake	298013411556044.jpg	298013411556044	298013411556044.jpg	FAKE	1	298013411556044.jpg	jpg
6196	0	6250	16661700	196020	3	0	3	0	3	Tell Sally Wong Sex Lee you saw this ad from DurianProperty to get best deal.Seksyen 25, Shah Alam, Bukit Kemuning 4.5 Acres Agriculture Land Land For Sale Selling Price: RM 16,661,700 Kindly Call for viewing: SALLY 016-660 1360 SALLY 016-660 1360 Welcome to visit my property website: Property Details: Land Area: 4.5 Acres (196,020 s.f) Category of Land: Agriculture Land Advantage: Flat land with…	Taman Sri Muda	Shah Alam	0	5	Taman Sri Muda, Shah Alam	3.03173	101.535	0	0	https://cdn.durianproperty.com.my/images/classified_ads/299377311649397.jpg	tell sally wong sex lee saw ad durianproperty get best deal seksyen shah alam bukit kemuning acres agriculture land land sale selling price rm kindly call viewing sally sally welcome visit property website property details land area acres f category land agriculture land advantage flat land infrastructure tenure freehold price per square feet rm seksyen shah alam bukit kemuning acres agriculture …	tell salli wong sex lee saw ad durianproperti get best deal seksyen shah alam bukit kemun acr agricultur land land sale sell price rm kindli call view salli salli welcom visit properti websit properti detail land area acr f categori land agricultur land advantag flat land infrastructur tenur freehold price per squar feet rm seksyen shah alam bukit kemun acr agricultur land land sale sell price rm…	['tell', 'salli', 'wong', 'sex', 'lee', 'saw', 'ad', 'durianproperti', 'get', 'best', 'deal', 'seksyen', 'shah', 'alam', 'bukit', 'kemun', 'acr', 'agricultur', 'land', 'land', 'sale', 'sell', 'price', 'rm', 'kindli', 'call', 'view', 'salli', 'salli', 'welcom', 'visit', 'properti', 'websit', 'properti', 'detail', 'land', 'area', 'acr', 'f', 'categori', 'land', 'agricultur', 'land', 'advantag', 'fl…	0	notfake	299377311649397.jpg	299377311649397	299377311649397.jpg	FAKE	1	299377311649397.jpg	jpg
6235	0	6290	885000	4324	5	0	7	0	2	Tell James TanCP you saw this ad from DurianProperty to get best deal.********** 3 HALF STOREY VILLA SENJA BRAND NEW RAWANG SEL ********** ********** 3 HALF STOREY VILLA SENJA BRAND NEW RAWANG SEL ********** ********** 3 HALF STOREY VILLA SENJA BRAND NEW RAWANG SEL ********** „Äê DROP : RM 600K „Äë „Äê MARKET VALUE : RM 1.5M „Äë =================================== Now Asking : RM 885K ===========…	Villa Senja	Rawang	0	1	Villa Senja, Rawang	3.32668	101.541	0	0	https://cdn.durianproperty.com.my/images/classified_ads/304675412013668.jpg	tell james tancp saw ad durianproperty get best deal half storey villa senja brand new rawang sel half storey villa senja brand new rawang sel half storey villa senja brand new rawang sel drop rm k market value rm m asking rm k please contact property details freehold bu sqf r b la sqf gated guarded swimming pool elevator lift others remark located matured neighbourhood excellent connectivity vip…	tell jame tancp saw ad durianproperti get best deal half storey villa senja brand new rawang sel half storey villa senja brand new rawang sel half storey villa senja brand new rawang sel drop rm k market valu rm m ask rm k pleas contact properti detail freehold bu sqf r b la sqf gate guard swim pool elev lift other remark locat matur neighbourhood excel connect vip group market properti facebook …	['tell', 'jame', 'tancp', 'saw', 'ad', 'durianproperti', 'get', 'best', 'deal', 'half', 'storey', 'villa', 'senja', 'brand', 'new', 'rawang', 'sel', 'half', 'storey', 'villa', 'senja', 'brand', 'new', 'rawang', 'sel', 'half', 'storey', 'villa', 'senja', 'brand', 'new', 'rawang', 'sel', 'drop', 'rm', 'k', 'market', 'valu', 'rm', 'm', 'ask', 'rm', 'k', 'pleas', 'contact', 'properti', 'detail', 'fre…	1	fake	304675412013668.jpg	304675412013668	304675412013668.jpg	FAKE	1	304675412013668.jpg	jpg
6360	0	6415	328000	1324	2	1	3	0	3	Tell jimmy you saw this ad from DurianProperty to get best deal.Call / WhatsApp Only !!! You may view Polo Park Profile here.	Polo Park	Johor Bahru	2	0	Polo Park, Johor Bahru	1.48856	103.79	0	0	https://cdn.durianproperty.com.my/images/classified_ads/303197211912577.jpg	tell jimmy saw ad durianproperty get best deal call whatsapp may view polo park profile	tell jimmi saw ad durianproperti get best deal call whatsapp may view polo park profil	['tell', 'jimmi', 'saw', 'ad', 'durianproperti', 'get', 'best', 'deal', 'call', 'whatsapp', 'may', 'view', 'polo', 'park', 'profil']	0	notfake	303197211912577.jpg	303197211912577	303197211912577.jpg	FAKE	1	303197211912577.jpg	jpg
6400	0	6455	12000000	12940	3	0	3	0	3	Tell Benny Chew you saw this ad from DurianProperty to get best deal.5 storey Commercial Shop building @ Jalan Tun H.S. Lee, Kuala Lumpur City Centre Type: 2 adjoining 5 storey intermediate Shop with roof garden opposite Chinatown & Next to Kota Raya 5mins walk to Masjid Jamek (350m) & Pasar Seni LRT Station (400m) with CCC Land Area: 3,602 SF Built-up area: 12,940 SF Selling @ RM12M Bank Valuati…	KL City Centre	Kuala Lumpur	1	4	KL City Centre, Kuala Lumpur	3.14664	101.696	1	0	https://cdn.durianproperty.com.my/images/classified_ads/298397811582324.jpg	tell benny chew saw ad durianproperty get best deal storey commercial shop building jalan tun h lee kuala lumpur city centre type adjoining storey intermediate shop roof garden opposite chinatown next kota raya mins walk masjid jamek m pasar seni lrt station m c land area sf built area sf selling rmm bank valuation rm m call benny whatsapp email benny please see listings may view kl city centre p…	tell benni chew saw ad durianproperti get best deal storey commerci shop build jalan tun h lee kuala lumpur citi centr type adjoin storey intermedi shop roof garden opposit chinatown next kota raya min walk masjid jamek m pasar seni lrt station m c land area sf built area sf sell rmm bank valuat rm m call benni whatsapp email benni pleas see list may view kl citi centr profil	['tell', 'benni', 'chew', 'saw', 'ad', 'durianproperti', 'get', 'best', 'deal', 'storey', 'commerci', 'shop', 'build', 'jalan', 'tun', 'h', 'lee', 'kuala', 'lumpur', 'citi', 'centr', 'type', 'adjoin', 'storey', 'intermedi', 'shop', 'roof', 'garden', 'opposit', 'chinatown', 'next', 'kota', 'raya', 'min', 'walk', 'masjid', 'jamek', 'm', 'pasar', 'seni', 'lrt', 'station', 'm', 'c', 'land', 'area', '…	0	notfake	298397811582324.jpg	298397811582324	298397811582324.jpg	FAKE	1	298397811582324.jpg	jpg
6415	0	6470	380000	764	2	0	2	1	2	Tell David Tan you saw this ad from DurianProperty to get best deal.Puchong New Township Condo PM location : You may view Bandar 16 Sierra Profile here.	Bandar 16 Sierra	Puchong	0	0	Bandar 16 Sierra, Puchong	2.96945	101.654	0	0	https://cdn.durianproperty.com.my/images/classified_ads/300348611711156.jpg	tell david tan saw ad durianproperty get best deal puchong new township condo pm location may view bandar sierra profile	tell david tan saw ad durianproperti get best deal puchong new township condo pm locat may view bandar sierra profil	['tell', 'david', 'tan', 'saw', 'ad', 'durianproperti', 'get', 'best', 'deal', 'puchong', 'new', 'township', 'condo', 'pm', 'locat', 'may', 'view', 'bandar', 'sierra', 'profil']	0	notfake	300348611711156.jpg	300348611711156	300348611711156.jpg	FAKE	1	300348611711156.jpg	jpg
6440	0	6495	442000	2141	3	0	4	0	2	Tell Mohd Fadzil Bin Mohd Sabri you saw this ad from DurianProperty to get best deal.New Launch Double Storey Nusari Bayu 2C (Alaris) @Bandar Sri Sendayan , Negeri Sembilan. :: :: Project Details:- . FREEHOLD . 20' X 70' . BUILT UP : 2141 sqft . HARGA BUMI LOT BERMULA : RM442,000 :: :: FREE:- . Legal Fee (HOC 2020) . MOT . MOC . Nikmati Rebate Sehingga 17% :: :: AMENITIES . Police Station ~ 5KM .…	Ara Sendayan	Bandar Sri Sendayan	3	1	Ara Sendayan, Bandar Sri Sendayan	2.67891	101.874	0	0	https://cdn.durianproperty.com.my/images/classified_ads/300299911707542.jpeg	tell mohd fadzil bin mohd sabri saw ad durianproperty get best deal new launch double storey nusari bayu c alaris sri sendayan negeri sembilan project details freehold x built sqft bumi lot price starts rm free legal fees hoc mot moc enjoy rebate amenities police station km fire station km tesco seremban km aeon km palm mall km toll seremban toll exit port dickson toll exit accessibility plus hig…	tell mohd fadzil bin mohd sabri saw ad durianproperti get best deal new launch doubl storey nusari bayu c alari sri sendayan negeri sembilan project detail freehold x built sqft bumi lot price start rm free legal fee hoc mot moc enjoy rebat amen polic station km fire station km tesco seremban km aeon km palm mall km toll seremban toll exit port dickson toll exit access plu highway seremban pd hig…	['tell', 'mohd', 'fadzil', 'bin', 'mohd', 'sabri', 'saw', 'ad', 'durianproperti', 'get', 'best', 'deal', 'new', 'launch', 'doubl', 'storey', 'nusari', 'bayu', 'c', 'alari', 'sri', 'sendayan', 'negeri', 'sembilan', 'project', 'detail', 'freehold', 'x', 'built', 'sqft', 'bumi', 'lot', 'price', 'start', 'rm', 'free', 'legal', 'fee', 'hoc', 'mot', 'moc', 'enjoy', 'rebat', 'amen', 'polic', 'station', …	0	notfake	300299911707542.jpeg	300299911707542	300299911707542.jpeg	FAKE	1	300299911707542.jpeg	jpeg
6452	0	6507	780000	2365	3	0	4	0	2	Tell Danny Lee you saw this ad from DurianProperty to get best deal.Double Storey Terrace Batu Kawan - Freehold - Booking Fee RM1000 - Complete 2023 Q4 - 5 minutes to North South Express Highway - 15 minutes to Tambun Famous Seafood Village - 25 acre Central Island Park - Gated and Guarded - Maintenance Fee RM0.15 per sqft - Surrounding Nearby Ikea , UOW College , Colombia Medical Centre , Restau…	Batu Kawan	Simpang Ampat	4	1	Batu Kawan, Simpang Ampat	5.27045	100.42	0	0	https://cdn.durianproperty.com.my/images/classified_ads/300587611728056.JPG	tell danny lee saw ad durianproperty get best deal double storey terrace batu kawan freehold booking fee rm complete q minutes north south express highway minutes tambun famous seafood village acre central island park gated guarded maintenance fee rm per sqft surrounding nearby ikea uow college colombia medical centre restaurant starbucks etc free spa loan legal fee price rm xx x intermediate uni…	tell danni lee saw ad durianproperti get best deal doubl storey terrac batu kawan freehold book fee rm complet q minut north south express highway minut tambun famou seafood villag acr central island park gate guard mainten fee rm per sqft surround nearbi ikea uow colleg colombia medic centr restaur starbuck etc free spa loan legal fee price rm xx x intermedi unit land area x ft onward build sf o…	['tell', 'danni', 'lee', 'saw', 'ad', 'durianproperti', 'get', 'best', 'deal', 'doubl', 'storey', 'terrac', 'batu', 'kawan', 'freehold', 'book', 'fee', 'rm', 'complet', 'q', 'minut', 'north', 'south', 'express', 'highway', 'minut', 'tambun', 'famou', 'seafood', 'villag', 'acr', 'central', 'island', 'park', 'gate', 'guard', 'mainten', 'fee', 'rm', 'per', 'sqft', 'surround', 'nearbi', 'ikea', 'uow'…	0	notfake	300587611728056.JPG	300587611728056	300587611728056.JPG	FAKE	1	300587611728056.JPG	JPG
6456	0	6511	1600000	95280	0	0	0	0	0	Tell Ruliza Mohd Zain you saw this ad from DurianProperty to get best deal.Agricultural Land With Industrial Potential at Sungai Choh Serendah Selangor Darul Ehsan PRICE RM17psf / RM1,600,000/- (SALE- MALAY RESERVE LAND - NEGOTIABLE) PROPERTY PROFILE An agricultural land with Industrial potential located at Bandar Sungai Choh, Serendah, Selangor Darul Ehsan It has a land area of about 0.8852 hect…	Serendah	Hulu Selangor	0	5	Serendah, Hulu Selangor	3.36393	101.603	0	1	https://cdn.durianproperty.com.my/images/classified_ads/300241711705304.JPG	tell ruliza mohd zain saw ad durianproperty get best deal agricultural land industrial potential sungai choh serendah selangor darul ehsan price rmpsf rm sale malay reserve land negotiable property profile agricultural land industrial potential located bandar sungai choh serendah selangor darul ehsan land area hectares acres square feet shape almost rectangular shape front rear portion level fron…	tell ruliza mohd zain saw ad durianproperti get best deal agricultur land industri potenti sungai choh serendah selangor darul ehsan price rmpsf rm sale malay reserv land negoti properti profil agricultur land industri potenti locat bandar sungai choh serendah selangor darul ehsan land area hectar acr squar feet shape almost rectangular shape front rear portion level frontag road nd layer main ro…	['tell', 'ruliza', 'mohd', 'zain', 'saw', 'ad', 'durianproperti', 'get', 'best', 'deal', 'agricultur', 'land', 'industri', 'potenti', 'sungai', 'choh', 'serendah', 'selangor', 'darul', 'ehsan', 'price', 'rmpsf', 'rm', 'sale', 'malay', 'reserv', 'land', 'negoti', 'properti', 'profil', 'agricultur', 'land', 'industri', 'potenti', 'locat', 'bandar', 'sungai', 'choh', 'serendah', 'selangor', 'darul',…	0	notfake	300241711705304.JPG	300241711705304	300241711705304.JPG	FAKE	1	300241711705304.JPG	JPG
6495	0	6550	673800	1962	3	0	4	0	2	Tell Seah you saw this ad from DurianProperty to get best deal.Bukit Mertajam @ Alma New Project Landed Property Rm 673800++ * Booking only rm1000 !!!! * Super width and long land area * 4 type 22'23'25'26 x 79 * Modern design * Free alarm system * Extra backyard space design Low densityPlease see more of my listings at http://st_seah.myagent.my/.You may view Alma Bukit Mertajam Profile here.	Alma Bukit Mertajam	Bukit Mertajam	4	1	Alma Bukit Mertajam, Bukit Mertajam	5.36546	100.459	0	0	https://cdn.durianproperty.com.my/images/classified_ads/302234911844752.JPG	tell seah saw ad durianproperty get best deal bukit mertajam alma new project landed property rm booking rm super width long land area type x modern design free alarm system extra backyard space design low densityplease see listings may view alma bukit mertajam profile	tell seah saw ad durianproperti get best deal bukit mertajam alma new project land properti rm book rm super width long land area type x modern design free alarm system extra backyard space design low densitypleas see list may view alma bukit mertajam profil	['tell', 'seah', 'saw', 'ad', 'durianproperti', 'get', 'best', 'deal', 'bukit', 'mertajam', 'alma', 'new', 'project', 'land', 'properti', 'rm', 'book', 'rm', 'super', 'width', 'long', 'land', 'area', 'type', 'x', 'modern', 'design', 'free', 'alarm', 'system', 'extra', 'backyard', 'space', 'design', 'low', 'densitypleas', 'see', 'list', 'may', 'view', 'alma', 'bukit', 'mertajam', 'profil']	0	notfake	302234911844752.JPG	302234911844752	302234911844752.JPG	FAKE	1	302234911844752.JPG	JPG
6507	0	6562	12266060	422967	3	0	3	0	3	Tell Sally Wong Sex Lee you saw this ad from DurianProperty to get best deal.Ampangan, Seremban Negeri Sembilan 9.71 Acres Industrial Land Land For Sale Selling Price: RM 12,266,060.00 Kindly Call for viewing: SALLY 016-660 1360 SALLY 016-660 1360 Welcome to visit my property website: Property Details: Land Area: 9.71 Acres (422,967.60 sf) Status: Industrial Land Tenure: Freehold Advantage: From …	Ampangan	Seremban	3	5	Ampangan, Seremban	2.73588	101.976	0	0	https://cdn.durianproperty.com.my/images/classified_ads/300286911706521.JPG	tell sally wong sex lee saw ad durianproperty get best deal ampangan seremban negeri sembilan acres industrial land land sale selling price rm kindly call viewing sally sally welcome visit property website property details land area acres sf status industrial land tenure freehold advantage lekas lebuhraya kajang seremban exit ampangan price per square feet price rm ampangan seremban negeri sembil…	tell salli wong sex lee saw ad durianproperti get best deal ampangan seremban negeri sembilan acr industri land land sale sell price rm kindli call view salli salli welcom visit properti websit properti detail land area acr sf statu industri land tenur freehold advantag leka lebuhraya kajang seremban exit ampangan price per squar feet price rm ampangan seremban negeri sembilan acr industri land l…	['tell', 'salli', 'wong', 'sex', 'lee', 'saw', 'ad', 'durianproperti', 'get', 'best', 'deal', 'ampangan', 'seremban', 'negeri', 'sembilan', 'acr', 'industri', 'land', 'land', 'sale', 'sell', 'price', 'rm', 'kindli', 'call', 'view', 'salli', 'salli', 'welcom', 'visit', 'properti', 'websit', 'properti', 'detail', 'land', 'area', 'acr', 'sf', 'statu', 'industri', 'land', 'tenur', 'freehold', 'advant…	0	notfake	300286911706521.JPG	300286911706521	300286911706521.JPG	FAKE	1	300286911706521.JPG	JPG
6550	0	6605	1850000	10613	3	0	3	1	3	Tell Azlan Abd Hamid you saw this ad from DurianProperty to get best deal.RESIDENTIAL LAND KOTA DAMANSARA FOR SALE! DETAILS: Leasehold / Bumi Lot Leased until year 2105 Land Area: 10613 sqft Flat land Next to Surau Al-Ikhwan Near to Strand Mall, convenience store, clinic & pharmacy, restaurant & eatery outlet & etc. Accessibility: LDP, PLUS Highway, NKVE Asking Price: RM 1.85 Million (Negotiable)…	Kota Damansara	Petaling Jaya	0	5	Kota Damansara, Petaling Jaya	3.16221	101.587	0	0	https://cdn.durianproperty.com.my/images/classified_ads/282971810693616.JPG	tell azlan abd hamid saw ad durianproperty get best deal residential land kota damansara sale details leasehold bumi lot leased year land area sqft flat land next surau al ikhwan near strand mall convenience store clinic pharmacy restaurant eatery outlet etc accessibility ldp plus highway nkve asking price rm million negotiable interested inquiries please contact azlan abd hamid ren mobile regist…	tell azlan abd hamid saw ad durianproperti get best deal residenti land kota damansara sale detail leasehold bumi lot leas year land area sqft flat land next surau al ikhwan near strand mall conveni store clinic pharmaci restaur eateri outlet etc access ldp plu highway nkve ask price rm million negoti interest inquiri pleas contact azlan abd hamid ren mobil regist real estat negoti fml zi valuer …	['tell', 'azlan', 'abd', 'hamid', 'saw', 'ad', 'durianproperti', 'get', 'best', 'deal', 'residenti', 'land', 'kota', 'damansara', 'sale', 'detail', 'leasehold', 'bumi', 'lot', 'leas', 'year', 'land', 'area', 'sqft', 'flat', 'land', 'next', 'surau', 'al', 'ikhwan', 'near', 'strand', 'mall', 'conveni', 'store', 'clinic', 'pharmaci', 'restaur', 'eateri', 'outlet', 'etc', 'access', 'ldp', 'plu', 'hig…	0	notfake	282971810693616.JPG	282971810693616	282971810693616.JPG	FAKE	1	282971810693616.JPG	JPG
6567	0	6622	520000	950	2	1	3	0	2	Tell Muhammad Amirullah Zainal you saw this ad from DurianProperty to get best deal.DWIPUTRA RESIDENCES CONDO PRESINT 15 PUTRAJAYA (Facing Open Near International Schools) ==================================== Monthly Rm 2,200. Price : RM520,000 (Nego) (Interest Boleh dapt lagi rendah) ==================================== DETAILS: Built up : 950 sqft Level 8 Block B2 Freehold Bumi Lot 3 Bedrooms 2…	Dwiputra Residences	Precinct 15	10	0	Dwiputra Residences, Precinct 15	2.94163	101.716	0	0	https://cdn.durianproperty.com.my/images/classified_ads/301543411795324.jpeg	tell muhammad amirullah zainal saw ad durianproperty get best deal dwiputra residences condo presint putrajaya facing open near international schools monthly rm price rm nego interest boleh dapt lagi rendah details built sqft level block b freehold bumi lot bedrooms bathroom covered parking renovation kitchen cabinet bar table dry wet kitchen wardrobe bedroom book shelf studyroom water heater air…	tell muhammad amirullah zainal saw ad durianproperti get best deal dwiputra resid condo presint putrajaya face open near intern school monthli rm price rm nego interest boleh dapt lagi rendah detail built sqft level block b freehold bumi lot bedroom bathroom cover park renov kitchen cabinet bar tabl dri wet kitchen wardrob bedroom book shelf studyroom water heater air cond wall paper grill full f…	['tell', 'muhammad', 'amirullah', 'zainal', 'saw', 'ad', 'durianproperti', 'get', 'best', 'deal', 'dwiputra', 'resid', 'condo', 'presint', 'putrajaya', 'face', 'open', 'near', 'intern', 'school', 'monthli', 'rm', 'price', 'rm', 'nego', 'interest', 'boleh', 'dapt', 'lagi', 'rendah', 'detail', 'built', 'sqft', 'level', 'block', 'b', 'freehold', 'bumi', 'lot', 'bedroom', 'bathroom', 'cover', 'park',…	0	notfake	301543411795324.jpeg	301543411795324	301543411795324.jpeg	FAKE	1	301543411795324.jpeg	jpeg
6766	0	6823	255879	879	2	0	3	0	3	Tell Diyana Zailani you saw this ad from DurianProperty to get best deal.PR1MA BANDAR BUKIT MAHKOTA FREEHOLD (PEGANGAN BEBAS) DI BANDAR BUKIT MAHKOTA, BANGI UNTUK DIJUAL (PROJEK RUMAH BARU) Diyana Zailani | REN43834 | CCI Property | ============================= BOOKING RM500 SAHAJA NO DEPOSIT OR 0 DOWNPAYMENT ============================== Jenis A Bilik : 3 Bilik Air : 2 Built Up :859 sqft Parki…	PR1MA Bandar Bukit Mahkota	Kajang	0	0	PR1MA Bandar Bukit Mahkota, Kajang	2.8839	101.798	0	0	https://cdn.durianproperty.com.my/images/classified_ads/300444611717390.png	tell diyana zailani saw ad durianproperty get best deal prma bandar bukit mahkota freehold freehold bandar bukit mahkota bangi sale new house project diyana zailani ren cci property booking rm deposit downpayment type rooms bathrooms built sqft parking free carparks per unit price rm discount type b rooms bathrooms built sqft parking free carparks per unit price rm discount maintenance fee rm per…	tell diyana zailani saw ad durianproperti get best deal prma bandar bukit mahkota freehold freehold bandar bukit mahkota bangi sale new hous project diyana zailani ren cci properti book rm deposit downpay type room bathroom built sqft park free carpark per unit price rm discount type b room bathroom built sqft park free carpark per unit price rm discount mainten fee rm per sqft facil km bandar bu…	['tell', 'diyana', 'zailani', 'saw', 'ad', 'durianproperti', 'get', 'best', 'deal', 'prma', 'bandar', 'bukit', 'mahkota', 'freehold', 'freehold', 'bandar', 'bukit', 'mahkota', 'bangi', 'sale', 'new', 'hous', 'project', 'diyana', 'zailani', 'ren', 'cci', 'properti', 'book', 'rm', 'deposit', 'downpay', 'type', 'room', 'bathroom', 'built', 'sqft', 'park', 'free', 'carpark', 'per', 'unit', 'price', '…	0	notfake	300444611717390.png	300444611717390	300444611717390.png	FAKE	1	300444611717390.png	png
6780	0	6837	580000	911	2	0	3	0	2	Tell Don Koay you saw this ad from DurianProperty to get best deal.- Freehold by Top Developer IJM Land - HOC 2021 - Selling 30% Below Market - Fully Residential - Spacious Layout - Low Density - Walking Distance to KTM & MRT - Located in Prime Location - Minimum Free 2 Car Park Easy Exit : * DUKE Highway * DUKE 2 Connection * SPRINT Highway * PLUS Highway * NKVE Highway * 500M to KL Metropolis (…	Riana Dutamas	Segambut	1	0	Riana Dutamas, Segambut	3.1849	101.669	0	0	https://cdn.durianproperty.com.my/images/classified_ads/304860312027000.jpg	tell koay saw ad durianproperty get best deal freehold top developer ijm land hoc selling market fully residential spacious layout low density walking distance ktm mrt located prime location minimum free car park easy exit duke highway duke connection sprint highway plus highway nkve highway m kl metropolis mitec mins publika mont kiara mins klcc mid valley one utama sunway putra mall min bangsar…	tell koay saw ad durianproperti get best deal freehold top develop ijm land hoc sell market fulli residenti spaciou layout low densiti walk distanc ktm mrt locat prime locat minimum free car park easi exit duke highway duke connect sprint highway plu highway nkve highway m kl metropoli mitec min publika mont kiara min klcc mid valley one utama sunway putra mall min bangsar pj damansara surround s…	['tell', 'koay', 'saw', 'ad', 'durianproperti', 'get', 'best', 'deal', 'freehold', 'top', 'develop', 'ijm', 'land', 'hoc', 'sell', 'market', 'fulli', 'residenti', 'spaciou', 'layout', 'low', 'densiti', 'walk', 'distanc', 'ktm', 'mrt', 'locat', 'prime', 'locat', 'minimum', 'free', 'car', 'park', 'easi', 'exit', 'duke', 'highway', 'duke', 'connect', 'sprint', 'highway', 'plu', 'highway', 'nkve', 'h…	0	notfake	304860312027000.jpg	304860312027000	304860312027000.jpg	FAKE	1	304860312027000.jpg	jpg
6792	0	6849	250000	500	2	2	2	1	1	Tell Muhammad Aizat you saw this ad from DurianProperty to get best deal."Dual Key Condo Nearest to Putrajaya ================================ ~Walk to University ~Walk to ERL ~Next to Premium Outlet ~10 Mins to Putrajaya ~5 Tier Security ~ROI up to 12% ~Free 1 Car Park ~More than 3 Mall in range 3km ~ROI up to 12% Declaration: Photo only for illustration to respect T&C state by developer Call Me…	Core Soho Suites @ KIP Central	Sepang	3	0	Core Soho Suites @ KIP Central, Sepang	2.82161	101.696	0	0	https://cdn.durianproperty.com.my/images/classified_ads/300277811705899.jpg	tell muhammad aizat saw ad durianproperty get best deal dual key condo nearest putrajaya walk university walk erl next premium outlet mins putrajaya tier security roi free car park mall range km roi declaration photo illustration respect c state developer call cash back till rmk kindly contact aizat free advice detail thanks may view core soho suites kip central profile	tell muhammad aizat saw ad durianproperti get best deal dual key condo nearest putrajaya walk univers walk erl next premium outlet min putrajaya tier secur roi free car park mall rang km roi declar photo illustr respect c state develop call cash back till rmk kindli contact aizat free advic detail thank may view core soho suit kip central profil	['tell', 'muhammad', 'aizat', 'saw', 'ad', 'durianproperti', 'get', 'best', 'deal', 'dual', 'key', 'condo', 'nearest', 'putrajaya', 'walk', 'univers', 'walk', 'erl', 'next', 'premium', 'outlet', 'min', 'putrajaya', 'tier', 'secur', 'roi', 'free', 'car', 'park', 'mall', 'rang', 'km', 'roi', 'declar', 'photo', 'illustr', 'respect', 'c', 'state', 'develop', 'call', 'cash', 'back', 'till', 'rmk', 'ki…	0	notfake	300277811705899.jpg	300277811705899	300277811705899.jpg	FAKE	1	300277811705899.jpg	jpg
6836	0	6893	2700000	1195	2	0	2	0	3	Banyan Tree is indeed a great place to live in and has a variety of different amenities within just few kilometers distance from the development. There are few famous residences such as K Residence, KLCC and Pavilion Residences, Bukit Bintang within just 10 km from the development. The residents can also find famous educational institutes such as Institut Evergreen, Tadika Kanak Kanak Pooi Leng, …	Banyan Tree	KLCC	1	0	Banyan Tree, KLCC	3.15049	101.714	0	0	https://cdn.durianproperty.com.my/images/classified_ads/299723511671878.jpeg	banyan tree indeed great place live variety different amenities within kilometers distance development famous residences k residence klcc pavilion residences bukit bintang within km development residents also find famous educational institutes institut evergreen tadika kanak kanak pooi leng sml fashion academy dworld hair beauty academy sdn bhd within km residents residents worry medical emergenc…	banyan tree inde great place live varieti differ amen within kilomet distanc develop famou resid k resid klcc pavilion resid bukit bintang within km develop resid also find famou educ institut institut evergreen tadika kanak kanak pooi leng sml fashion academi dworld hair beauti academi sdn bhd within km resid resid worri medic emerg well mani famou medic clinic within minut drive develop banyan …	['banyan', 'tree', 'inde', 'great', 'place', 'live', 'varieti', 'differ', 'amen', 'within', 'kilomet', 'distanc', 'develop', 'famou', 'resid', 'k', 'resid', 'klcc', 'pavilion', 'resid', 'bukit', 'bintang', 'within', 'km', 'develop', 'resid', 'also', 'find', 'famou', 'educ', 'institut', 'institut', 'evergreen', 'tadika', 'kanak', 'kanak', 'pooi', 'leng', 'sml', 'fashion', 'academi', 'dworld', 'hai…	0	notfake	299723511671878.jpeg	299723511671878	299723511671878.jpeg	FAKE	1	299723511671878.jpeg	jpeg
6926	0	6984	345000	900	2	0	3	0	0	Tell Lim yii wei you saw this ad from DurianProperty to get best deal.RUMAH BARU SETINGKAT UNTUK DIJUAL DI BUKIT CHANGGANG (TAMAN SERI DAGANG 1)!!! EARLY BIRD PROMOTION UP TO 9% DISCOUNT!!! TEMPAHAN RM1000 SAHAJA!!! INFO - Rumah Baru Teres Setingkat @ Taman Seri Dagang 1, Bukit Changgang - Saiz 20‚Äô x 70‚Äô - 3 Bilik Tidur & 2 Bilik Air - Freehold Land Kemudahan Dalam 3km (2-8 minit) - Kolej Mar…	Kampong Bukit Changgang	Banting	0	1	Kampong Bukit Changgang, Banting	2.8289	101.628	0	0	https://cdn.durianproperty.com.my/images/classified_ads/305197812051236.PNG	tell lim yii wei saw ad durianproperty get best deal new single story house sale bukit changgang taman seri dagang early bird promotion discount order rm info single storey terrace new house taman seri dagang bukit changgang size x bedrooms bathrooms freehold land facilities within km minutes kolej mara smk bukit changgang sk bukit changgang bukit changgang health clinic surau mosque petrol stati…	tell lim yii wei saw ad durianproperti get best deal new singl stori hous sale bukit changgang taman seri dagang earli bird promot discount order rm info singl storey terrac new hous taman seri dagang bukit changgang size x bedroom bathroom freehold land facil within km minut kolej mara smk bukit changgang sk bukit changgang bukit changgang health clinic surau mosqu petrol station nearbi locat mi…	['tell', 'lim', 'yii', 'wei', 'saw', 'ad', 'durianproperti', 'get', 'best', 'deal', 'new', 'singl', 'stori', 'hous', 'sale', 'bukit', 'changgang', 'taman', 'seri', 'dagang', 'earli', 'bird', 'promot', 'discount', 'order', 'rm', 'info', 'singl', 'storey', 'terrac', 'new', 'hous', 'taman', 'seri', 'dagang', 'bukit', 'changgang', 'size', 'x', 'bedroom', 'bathroom', 'freehold', 'land', 'facil', 'with…	0	notfake	305197812051236.PNG	305197812051236	305197812051236.PNG	FAKE	1	305197812051236.PNG	PNG
6963	0	7022	590000	1066	2	1	3	0	2	Tell Ms Ooi you saw this ad from DurianProperty to get best deal.Ten Kinrara - 5 Mins Walking to LRT, Giant, banks, fitness center, restaurants Beautiful Location for Investment !! Hot Selling Location !! Ten Kinrara Brand New Serviced Apartment Bandar Kinrara Brand New Serviced Apartment For Sale. Right Next to Giant Hypermarket at BK 5 And LRT Station. Suitable for the newly-weds or working pro…	Ten Kinrara	Bandar Kinrara	0	0	Ten Kinrara, Bandar Kinrara	3.04833	101.647	0	0	https://cdn.durianproperty.com.my/images/classified_ads/301326311780930.png	tell ms ooi saw ad durianproperty get best deal ten kinrara mins walking lrt giant banks fitness center restaurants beautiful location investment hot selling location ten kinrara brand new serviced apartment bandar kinrara brand new serviced apartment sale right next giant hypermarket bk lrt station suitable newly weds working professional wishes stay prime location near everything highly suitabl…	tell ms ooi saw ad durianproperti get best deal ten kinrara min walk lrt giant bank fit center restaur beauti locat invest hot sell locat ten kinrara brand new servic apart bandar kinrara brand new servic apart sale right next giant hypermarket bk lrt station suitabl newli wed work profession wish stay prime locat near everyth highli suitabl also invest near lrt station variou amen unit face buki…	['tell', 'ms', 'ooi', 'saw', 'ad', 'durianproperti', 'get', 'best', 'deal', 'ten', 'kinrara', 'min', 'walk', 'lrt', 'giant', 'bank', 'fit', 'center', 'restaur', 'beauti', 'locat', 'invest', 'hot', 'sell', 'locat', 'ten', 'kinrara', 'brand', 'new', 'servic', 'apart', 'bandar', 'kinrara', 'brand', 'new', 'servic', 'apart', 'sale', 'right', 'next', 'giant', 'hypermarket', 'bk', 'lrt', 'station', 'su…	0	notfake	301326311780930.png	301326311780930	301326311780930.png	FAKE	1	301326311780930.png	png
6965	0	7024	8500000	100	0	0	0	0	0	Tell Mohd Nuruddin Hussin you saw this ad from DurianProperty to get best deal.Freehold Oil Palm Land at Teluk Intan for sale ------------------------------------------------------------------------- - Freehold, non-bumi - Located at Langkap, Perak - 100 acres +- - Palm oil tree 20 to 25 years - Got access road - 400 Meter from main road - Flat Land - Can access by normal car - Not flooding area …	Teluk Intan	Perak	5	5	Teluk Intan, Perak	4.02242	101.021	0	0	https://cdn.durianproperty.com.my/images/classified_ads/301465211790467.jpg	tell mohd nuruddin hussin saw ad durianproperty get best deal freehold oil palm land teluk intan sale freehold non bumi located langkap perak acres palm oil tree years got access road meter main road flat land access normal car flooding area asking price rm rm per acre nego photo illustration viewing enquiries appointment please contact mohd nuruddin ren hebat realtors e wassapp link owner welcom…	tell mohd nuruddin hussin saw ad durianproperti get best deal freehold oil palm land teluk intan sale freehold non bumi locat langkap perak acr palm oil tree year got access road meter main road flat land access normal car flood area ask price rm rm per acr nego photo illustr view enquiri appoint pleas contact mohd nuruddin ren hebat realtor e wassapp link owner welcom list properti hebat realtor…	['tell', 'mohd', 'nuruddin', 'hussin', 'saw', 'ad', 'durianproperti', 'get', 'best', 'deal', 'freehold', 'oil', 'palm', 'land', 'teluk', 'intan', 'sale', 'freehold', 'non', 'bumi', 'locat', 'langkap', 'perak', 'acr', 'palm', 'oil', 'tree', 'year', 'got', 'access', 'road', 'meter', 'main', 'road', 'flat', 'land', 'access', 'normal', 'car', 'flood', 'area', 'ask', 'price', 'rm', 'rm', 'per', 'acr',…	0	notfake	301465211790467.jpg	301465211790467	301465211790467.jpg	FAKE	1	301465211790467.jpg	jpg
7039	0	7098	490000	2124	3	1	4	0	2	You may view Klang Sentral Profile here.	Klang Sentral	Klang	0	1	Klang Sentral, Klang	3.10783	101.44	0	0	https://cdn.durianproperty.com.my/images/classified_ads/304039011968481.jpg	may view klang sentral profile	may view klang sentral profil	['may', 'view', 'klang', 'sentral', 'profil']	0	notfake	304039011968481.jpg	304039011968481	304039011968481.jpg	FAKE	1	304039011968481.jpg	jpg
7097	0	7156	700000	1389	3	1	4	0	2	Tell Ivy Yew you saw this ad from DurianProperty to get best deal.LUXURY CONDO, CYBERJAYA!!!! ## Sub sales Type EE 1389sqft *PARTIALLY FURNISHED *Inclusive 2carpark and 3 air cond Grab it now.....!!!!!!! For further inquiry please contact Ivyyew at 012-2113 899 , > FREEHOLD High-end Condo in Cyberjaya < - size from 1109sf - 1800sf (3R+2B to 5R+4B) - Low density (265 units), more than 20 facilitie…	Lake Point Residences	Cyberjaya	7	0	Lake Point Residences, Cyberjaya	2.92945	101.634	0	0	https://cdn.durianproperty.com.my/images/classified_ads/277074610388887.jpg	tell ivy yew saw ad durianproperty get best deal luxury condo cyberjaya sub sales type ee sqft partially furnished inclusive carpark air cond grab inquiry please contact ivyyew freehold high end condo cyberjaya size sf sf r b r b low density units facilities zero downpayment cash back surrounded million ringgit landed properties walking distance primary school sjkc union upcoming life style mall …	tell ivi yew saw ad durianproperti get best deal luxuri condo cyberjaya sub sale type ee sqft partial furnish inclus carpark air cond grab inquiri pleas contact ivyyew freehold high end condo cyberjaya size sf sf r b r b low densiti unit facil zero downpay cash back surround million ringgit land properti walk distanc primari school sjkc union upcom life style mall mix develop strateg locat near m…	['tell', 'ivi', 'yew', 'saw', 'ad', 'durianproperti', 'get', 'best', 'deal', 'luxuri', 'condo', 'cyberjaya', 'sub', 'sale', 'type', 'ee', 'sqft', 'partial', 'furnish', 'inclus', 'carpark', 'air', 'cond', 'grab', 'inquiri', 'pleas', 'contact', 'ivyyew', 'freehold', 'high', 'end', 'condo', 'cyberjaya', 'size', 'sf', 'sf', 'r', 'b', 'r', 'b', 'low', 'densiti', 'unit', 'facil', 'zero', 'downpay', 'ca…	0	notfake	277074610388887.jpg	277074610388887	277074610388887.jpg	FAKE	1	277074610388887.jpg	jpg
7220	0	7279	450000	2152	3	0	4	0	3	Tell Alexchin you saw this ad from DurianProperty to get best deal.Free of all charges, absolutely no hidden charges - Refundable booking fee - No Down payment SELLING POINTS : - Gated and guarded, 24 hours surveillance - Free 2 years maintenance fee, broadband wifi, private clubhouse access - Semi Furnished - Township completed with ALL infrastructures ACCESS ‚úîFreehold 5 minutes to major highw…	Vista Subang	Ara Damansara	1	2	Vista Subang, Ara Damansara	3.12444	101.583	0	0	https://cdn.durianproperty.com.my/images/classified_ads/302772711884243.jpg	tell alexchin saw ad durianproperty get best deal free charges absolutely hidden charges refundable booking fee payment selling points gated guarded hours surveillance free years maintenance fee broadband wifi private clubhouse access semi furnished township completed infrastructures access freehold minutes major highway access plus elite mex lekas kesas sklia toll free highway show unit infrastr…	tell alexchin saw ad durianproperti get best deal free charg absolut hidden charg refund book fee payment sell point gate guard hour surveil free year mainten fee broadband wifi privat clubhous access semi furnish township complet infrastructur access freehold minut major highway access plu elit mex leka kesa sklia toll free highway show unit infrastructur avail see believ pleas contact show hous…	['tell', 'alexchin', 'saw', 'ad', 'durianproperti', 'get', 'best', 'deal', 'free', 'charg', 'absolut', 'hidden', 'charg', 'refund', 'book', 'fee', 'payment', 'sell', 'point', 'gate', 'guard', 'hour', 'surveil', 'free', 'year', 'mainten', 'fee', 'broadband', 'wifi', 'privat', 'clubhous', 'access', 'semi', 'furnish', 'township', 'complet', 'infrastructur', 'access', 'freehold', 'minut', 'major', 'h…	0	notfake	302772711884243.jpg	302772711884243	302772711884243.jpg	FAKE	1	302772711884243.jpg	jpg
7261	0	7321	250000	500	2	2	2	1	1	"You may view Core Soho Suites @ KIP Central Profile here.	Core Soho Suites @ KIP Central	Sepang	3	0	Core Soho Suites @ KIP Central, Sepang	2.82161	101.696	0	0	https://cdn.durianproperty.com.my/images/classified_ads/299821811678432.jpg	may view core soho suites kip central profile	may view core soho suit kip central profil	['may', 'view', 'core', 'soho', 'suit', 'kip', 'central', 'profil']	0	notfake	299821811678432.jpg	299821811678432	299821811678432.jpg	FAKE	1	299821811678432.jpg	jpg
7263	0	7323	288000	850	2	1	3	0	2	Tell Gavin Lau you saw this ad from DurianProperty to get best deal.Korang nak beli rumah tapi takut tak dapat loan ??? Sekarang tidak ada masalah ini lagi di ACACIA RESIDENCES Kami sedia membantu anda untuk memiliki rumah idaman anda dengan senang dan cepat . Sekiranya permohonan pinjaman perumahan anda tidak mendapat kelulusan dari bank , maka anda boleh membuat permohonan pinjaman ini terus da…	Bandar Baru Salak Tinggi	Sepang	0	0	Bandar Baru Salak Tinggi, Sepang	2.81366	101.731	0	0	https://cdn.durianproperty.com.my/images/classified_ads/301217111771604.jpg	tell gavin lau saw ad durianproperty get best deal want buy house afraid getting loan problem acacia residences ready help dream home easily quickly housing loan application approved bank apply loan directly developer low interest rate open government private personnel eligibility check interested affordable housing project salak perdana sepang rm booking fee without paying deposit low density ad…	tell gavin lau saw ad durianproperti get best deal want buy hous afraid get loan problem acacia resid readi help dream home easili quickli hous loan applic approv bank appli loan directli develop low interest rate open govern privat personnel elig check interest afford hous project salak perdana sepang rm book fee without pay deposit low densiti advanc money full loan price rmk free legal fee car…	['tell', 'gavin', 'lau', 'saw', 'ad', 'durianproperti', 'get', 'best', 'deal', 'want', 'buy', 'hous', 'afraid', 'get', 'loan', 'problem', 'acacia', 'resid', 'readi', 'help', 'dream', 'home', 'easili', 'quickli', 'hous', 'loan', 'applic', 'approv', 'bank', 'appli', 'loan', 'directli', 'develop', 'low', 'interest', 'rate', 'open', 'govern', 'privat', 'personnel', 'elig', 'check', 'interest', 'affor…	0	notfake	301217111771604.jpg	301217111771604	301217111771604.jpg	FAKE	1	301217111771604.jpg	jpg
7288	0	7350	6126750	17505	3	0	3	0	3	Tell MOHD FAUZI MOHAMED you saw this ad from DurianProperty to get best deal.RESIDENTIAL LAND IN PERSIARAN TITIWANGSA KUALA LUMPUR FOR SALE TYPE OF PROPERTY Bungalow Lot Flat Land & Square CATEGORY Not Stated LOCATION Persiaran Titiwangsa, Kuala Lumpur LAND SIZE 17,505 sf TENURE Freehold ASKING PRICE RM350 psf / RM 6,126,750 ONO FOR INQUIRY / VIEWING APPOINTMENT, PLEASE CALL FAUZI 013 4665982 mas…	Titiwangsa	Kuala Lumpur	1	5	Titiwangsa, Kuala Lumpur	3.17738	101.708	0	0	https://cdn.durianproperty.com.my/images/classified_ads/300695711736084.jpg	tell mohd fauzi mohamed saw ad durianproperty get best deal residential land persiaran titiwangsa kuala lumpur sale type property bungalow lot flat land square category stated location persiaran titiwangsa kuala lumpur land size sf tenure freehold asking price rm psf rm ono inquiry viewing appointment please call fauzi mastikayou may view titiwangsa profile	tell mohd fauzi moham saw ad durianproperti get best deal residenti land persiaran titiwangsa kuala lumpur sale type properti bungalow lot flat land squar categori state locat persiaran titiwangsa kuala lumpur land size sf tenur freehold ask price rm psf rm ono inquiri view appoint pleas call fauzi mastikay may view titiwangsa profil	['tell', 'mohd', 'fauzi', 'moham', 'saw', 'ad', 'durianproperti', 'get', 'best', 'deal', 'residenti', 'land', 'persiaran', 'titiwangsa', 'kuala', 'lumpur', 'sale', 'type', 'properti', 'bungalow', 'lot', 'flat', 'land', 'squar', 'categori', 'state', 'locat', 'persiaran', 'titiwangsa', 'kuala', 'lumpur', 'land', 'size', 'sf', 'tenur', 'freehold', 'ask', 'price', 'rm', 'psf', 'rm', 'ono', 'inquiri',…	0	notfake	300695711736084.jpg	300695711736084	300695711736084.jpg	FAKE	1	300695711736084.jpg	jpg
7307	0	7369	239000	1128	2	0	4	1	2	Tell siti hawa you saw this ad from DurianProperty to get best deal.PELUANG MEMILIKI RUMAH TERES MAMPU MILIK DI KUALA SELANGOR PERMODALAN NEGERI SELANGOR BERHAD SELANGOR dengan kerjasama SERAMBI PADU SDN BHD sedang membangunkan tanah seluas 30 Ekar di Kuala Selangor Ini PROJEK RUMAH MAMPU MILIK yang sangat MURAH di Kuala Selangor Fasa 1 dan Fasa 2 telah habis dijual. Sekarang berbaki untuk Fasa 3…	Taman Sungai Yu Indah	Kuala Selangor	0	1	Taman Sungai Yu Indah, Kuala Selangor	3.36611	101.224	2	0	https://cdn.durianproperty.com.my/images/classified_ads/302081211833493.jpg	tell siti hawa saw ad durianproperty get best deal opportunity affordable terrace house kuala selangor selangor state capital berhad selangor collaboration serambi padu sdn bhd developing acre land kuala selangor affordable house project cheap kuala selangor phase phase sold remaining phase rm salary rm buy insyaallah property owners selangor still buy affordable project half floor rooms bathroom…	tell siti hawa saw ad durianproperti get best deal opportun afford terrac hous kuala selangor selangor state capit berhad selangor collabor serambi padu sdn bhd develop acr land kuala selangor afford hous project cheap kuala selangor phase phase sold remain phase rm salari rm buy insyaallah properti owner selangor still buy afford project half floor room bathroom balconi leasehold land area x bui…	['tell', 'siti', 'hawa', 'saw', 'ad', 'durianproperti', 'get', 'best', 'deal', 'opportun', 'afford', 'terrac', 'hous', 'kuala', 'selangor', 'selangor', 'state', 'capit', 'berhad', 'selangor', 'collabor', 'serambi', 'padu', 'sdn', 'bhd', 'develop', 'acr', 'land', 'kuala', 'selangor', 'afford', 'hous', 'project', 'cheap', 'kuala', 'selangor', 'phase', 'phase', 'sold', 'remain', 'phase', 'rm', 'sala…	0	notfake	302081211833493.jpg	302081211833493	302081211833493.jpg	FAKE	1	302081211833493.jpg	jpg
7431	0	7493	358000	920	2	0	4	1	2	Tell John Tai you saw this ad from DurianProperty to get best deal.Dekat dengan Highway Tanah Extra Belakang Rumah Rm1500 sebulanYou may view Taman Intan Baiduri Profile here.	Taman Intan Baiduri	Sepang	3	1	Taman Intan Baiduri, Sepang	2.80291	101.706	0	0	https://cdn.durianproperty.com.my/images/classified_ads/303984211964625.jpeg	tell john tai saw ad durianproperty get best deal close highway tanah extra rear house rm monthyou may view taman intan baiduri profile	tell john tai saw ad durianproperti get best deal close highway tanah extra rear hous rm monthyou may view taman intan baiduri profil	['tell', 'john', 'tai', 'saw', 'ad', 'durianproperti', 'get', 'best', 'deal', 'close', 'highway', 'tanah', 'extra', 'rear', 'hous', 'rm', 'monthyou', 'may', 'view', 'taman', 'intan', 'baiduri', 'profil']	0	notfake	303984211964625.jpeg	303984211964625	303984211964625.jpeg	FAKE	1	303984211964625.jpeg	jpeg
7432	0	7494	220000	280	1	1	1	1	1	Tell Adrian Ng you saw this ad from DurianProperty to get best deal.SoHo Transit @ KL City Centre Only RM 230K ‚ú® Monthly Payment from RM800/= Only Potential Earning RM1300-1600 PER MTH!! Great job opportunities nearby TRX You may view Suria KLCC Profile here.	Suria KLCC	KLCC	1	6	Suria KLCC, KLCC	3.15772	101.712	0	0	https://cdn.durianproperty.com.my/images/classified_ads/304158511977697.jpg	tell adrian ng saw ad durianproperty get best deal soho transit kl city centre rm k monthly payment rm potential earning rm per mth great job opportunities nearby trx may view suria klcc profile	tell adrian ng saw ad durianproperti get best deal soho transit kl citi centr rm k monthli payment rm potenti earn rm per mth great job opportun nearbi trx may view suria klcc profil	['tell', 'adrian', 'ng', 'saw', 'ad', 'durianproperti', 'get', 'best', 'deal', 'soho', 'transit', 'kl', 'citi', 'centr', 'rm', 'k', 'monthli', 'payment', 'rm', 'potenti', 'earn', 'rm', 'per', 'mth', 'great', 'job', 'opportun', 'nearbi', 'trx', 'may', 'view', 'suria', 'klcc', 'profil']	0	notfake	304158511977697.jpg	304158511977697	304158511977697.jpg	FAKE	1	304158511977697.jpg	jpg
7433	0	7495	650000	450	1	2	1	1	3	Tell Cherry Fu you saw this ad from DurianProperty to get best deal.Please contact CHERRY FU @ 012-668 2596 for viewing and more info. KL BUKIT BINTANG PAVILION NEW SERVICE RESIDENCE DUAL KEY CONCEPT ONLY RM6xxK ++ =============================================================================== AXON @ BUKIT BINTANG DUAL KEYS CONCEPT! DUAL TENANCY! DUAL INCOME! WALKING DISTANCE TO PAVILION, FAHRENH…	Bukit Bintang	KL City Centre	1	0	Bukit Bintang, KL City Centre	3.14679	101.711	0	1	https://cdn.durianproperty.com.my/images/classified_ads/290556711094301.jpg	tell cherry fu saw ad durianproperty get best deal please contact cherry fu viewing info kl bukit bintang pavilion new service residence dual key concept rmxxk axon bukit bintang dual keys concept dual tenancy dual income walking distance pavilion fahrenheit starhill lot g time square etc new serviced residence center golden triangle bukit bintang starting price rmk rmk come fully furnished call …	tell cherri fu saw ad durianproperti get best deal pleas contact cherri fu view info kl bukit bintang pavilion new servic resid dual key concept rmxxk axon bukit bintang dual key concept dual tenanc dual incom walk distanc pavilion fahrenheit starhil lot g time squar etc new servic resid center golden triangl bukit bintang start price rmk rmk come fulli furnish call get earli bird rebat size sqft…	['tell', 'cherri', 'fu', 'saw', 'ad', 'durianproperti', 'get', 'best', 'deal', 'pleas', 'contact', 'cherri', 'fu', 'view', 'info', 'kl', 'bukit', 'bintang', 'pavilion', 'new', 'servic', 'resid', 'dual', 'key', 'concept', 'rmxxk', 'axon', 'bukit', 'bintang', 'dual', 'key', 'concept', 'dual', 'tenanc', 'dual', 'incom', 'walk', 'distanc', 'pavilion', 'fahrenheit', 'starhil', 'lot', 'g', 'time', 'squ…	0	notfake	290556711094301.jpg	290556711094301	290556711094301.jpg	FAKE	1	290556711094301.jpg	jpg
7463	0	7525	680000	2613	4	0	5	0	4	Tell Vivian Poh you saw this ad from DurianProperty to get best deal.New Launching Double Storey Terrace House (Eco Friendly Environment | Close to Bandar Sri Damansara ) Best Deal In town Landed Property CORNER | INTERMEDIATE | ENDLOT ( Available now) Individual Title Clubhouse Facalities 50- Acer Central Park Showroom is ready to visit Hurry Up Make Appointment : - AAA Estate Agents Sdn. Bhd. (…	Bandar Seri Coalfields	Sungai Buloh	0	1	Bandar Seri Coalfields, Sungai Buloh	3.24087	101.48	0	0	https://cdn.durianproperty.com.my/images/classified_ads/303791911952862.jpg	tell vivian poh saw ad durianproperty get best deal new launching double storey terrace house eco friendly environment close bandar sri damansara best deal town landed property corner intermediate endlot available individual title clubhouse facalities acer central park showroom ready visit hurry make appointment estate agents sdn bhd e may view bandar seri coalfields profile	tell vivian poh saw ad durianproperti get best deal new launch doubl storey terrac hous eco friendli environ close bandar sri damansara best deal town land properti corner intermedi endlot avail individu titl clubhous facal acer central park showroom readi visit hurri make appoint estat agent sdn bhd e may view bandar seri coalfield profil	['tell', 'vivian', 'poh', 'saw', 'ad', 'durianproperti', 'get', 'best', 'deal', 'new', 'launch', 'doubl', 'storey', 'terrac', 'hous', 'eco', 'friendli', 'environ', 'close', 'bandar', 'sri', 'damansara', 'best', 'deal', 'town', 'land', 'properti', 'corner', 'intermedi', 'endlot', 'avail', 'individu', 'titl', 'clubhous', 'facal', 'acer', 'central', 'park', 'showroom', 'readi', 'visit', 'hurri', 'ma…	0	notfake	303791911952862.jpg	303791911952862	303791911952862.jpg	FAKE	1	303791911952862.jpg	jpg
7575	0	7638	520000	1028	3	1	4	1	3	Tell Cherry Fu you saw this ad from DurianProperty to get best deal.Please contact CHERRY FU @ 012-668 2596 for viewing and more info. OLD KLANG ROAD PRE PRE NEW LAUNCH PROJECT ONLY RM3XXK+ ================================================================= < < OPEN FOR REGISTRATION FOR VVIP >> < < BELOW MARKET PRICE >> ONLY RM3xxk+ Onwards!!! < < KLANG VALLEY GOLDEN TRIANGLE >> LOW DENSITY ONLY 70…	Platinum Arena	Old Klang Road	0	0	Platinum Arena, Old Klang Road	3.08217	101.664	0	1	https://cdn.durianproperty.com.my/images/classified_ads/289007811002692.jpg	tell cherry fu saw ad durianproperty get best deal please contact cherry fu viewing info old klang road pre pre new launch project rmxxk open registration vvip market price rmxxk onwards klang valley golden triangle low density units layout plan room bath room bath balcony room bath dual key concept balcony super early bird package super low entry fee free bumi free legal fee free stamp duty free…	tell cherri fu saw ad durianproperti get best deal pleas contact cherri fu view info old klang road pre pre new launch project rmxxk open registr vvip market price rmxxk onward klang valley golden triangl low densiti unit layout plan room bath room bath balconi room bath dual key concept balconi super earli bird packag super low entri fee free bumi free legal fee free stamp duti free partli furni…	['tell', 'cherri', 'fu', 'saw', 'ad', 'durianproperti', 'get', 'best', 'deal', 'pleas', 'contact', 'cherri', 'fu', 'view', 'info', 'old', 'klang', 'road', 'pre', 'pre', 'new', 'launch', 'project', 'rmxxk', 'open', 'registr', 'vvip', 'market', 'price', 'rmxxk', 'onward', 'klang', 'valley', 'golden', 'triangl', 'low', 'densiti', 'unit', 'layout', 'plan', 'room', 'bath', 'room', 'bath', 'balconi', '…	0	notfake	289007811002692.jpg	289007811002692	289007811002692.jpg	FAKE	1	289007811002692.jpg	jpg
7599	0	7662	25300000	220	0	0	0	0	0	Tell Mohd Nuruddin Hussin you saw this ad from DurianProperty to get best deal.Freehold Oil Palm Land at Bagan Datoh, Perak for sale ------------------------------------------------------------------------- - Freehold, non-bumi - Located at Teluk Intan, Perak - 220 acres - Many Titles - Similar 10 acres for each title - Flat land & good access road - Palm oil tree mix 4 years old (planting 2016) …	Bagan Datoh	Perak	5	5	Bagan Datoh, Perak	3.99191	100.786	0	0	https://cdn.durianproperty.com.my/images/classified_ads/301306511779214.jpg	tell mohd nuruddin hussin saw ad durianproperty get best deal freehold oil palm land bagan datoh perak sale freehold non bumi located teluk intan perak acres many titles similar acres title flat land good access road palm oil tree mix years old planting years old planting photo illustration asking price rm rm per acre nego interested please contact mohd nuruddin hussin ren hebat realtors owner we…	tell mohd nuruddin hussin saw ad durianproperti get best deal freehold oil palm land bagan datoh perak sale freehold non bumi locat teluk intan perak acr mani titl similar acr titl flat land good access road palm oil tree mix year old plant year old plant photo illustr ask price rm rm per acr nego interest pleas contact mohd nuruddin hussin ren hebat realtor owner welcom list properti match datab…	['tell', 'mohd', 'nuruddin', 'hussin', 'saw', 'ad', 'durianproperti', 'get', 'best', 'deal', 'freehold', 'oil', 'palm', 'land', 'bagan', 'datoh', 'perak', 'sale', 'freehold', 'non', 'bumi', 'locat', 'teluk', 'intan', 'perak', 'acr', 'mani', 'titl', 'similar', 'acr', 'titl', 'flat', 'land', 'good', 'access', 'road', 'palm', 'oil', 'tree', 'mix', 'year', 'old', 'plant', 'year', 'old', 'plant', 'pho…	0	notfake	301306511779214.jpg	301306511779214	301306511779214.jpg	FAKE	1	301306511779214.jpg	jpg
7685	0	7748	620000	807	2	1	2	0	2	Tell Shaun Chong you saw this ad from DurianProperty to get best deal.Urbana Residences @ Ara Damansara for SALE The Next BIG Boom Property Area Near to Subang Airport and MRT ready! * 807sf * 2 bedroom with 2 bathroom * Partially furnished with kitchen cabinet, aircon, fans, water heater, curtains * 2 car parks * Low Density Condominium and Hip and Happening Place Facilities - Gymnasium - Swimmi…	Urbana Residences	Ara Damansara	1	0	Urbana Residences, Ara Damansara	3.11173	101.582	0	0	https://cdn.durianproperty.com.my/images/classified_ads/304494712003380.jpg	tell shaun chong saw ad durianproperty get best deal urbana residences ara damansara sale next big boom property area near subang airport mrt ready sf bedroom bathroom partially furnished kitchen cabinet aircon fans water heater curtains car parks low density condominium hip happening place facilities gymnasium swimming pool poolside pavilion sky garden garden terrace jacuzzi barbeque area cabana…	tell shaun chong saw ad durianproperti get best deal urbana resid ara damansara sale next big boom properti area near subang airport mrt readi sf bedroom bathroom partial furnish kitchen cabinet aircon fan water heater curtain car park low densiti condominium hip happen place facil gymnasium swim pool poolsid pavilion sky garden garden terrac jacuzzi barbequ area cabana swing cocoon multi purpos …	['tell', 'shaun', 'chong', 'saw', 'ad', 'durianproperti', 'get', 'best', 'deal', 'urbana', 'resid', 'ara', 'damansara', 'sale', 'next', 'big', 'boom', 'properti', 'area', 'near', 'subang', 'airport', 'mrt', 'readi', 'sf', 'bedroom', 'bathroom', 'partial', 'furnish', 'kitchen', 'cabinet', 'aircon', 'fan', 'water', 'heater', 'curtain', 'car', 'park', 'low', 'densiti', 'condominium', 'hip', 'happen'…	0	notfake	304494712003380.jpg	304494712003380	304494712003380.jpg	FAKE	1	304494712003380.jpg	jpg
7713	0	7776	269000	465	1	2	2	1	1	Tell Bryan you saw this ad from DurianProperty to get best deal.Valley Suite 465sqft PELUANG PELABURAN DENGAN KOS RENDAH !!! *TAR University College - JARAK JALAN BERJALAN KAKI *UIA / IIUM - 1km *Kuantan Medical Centre - 2km *Bandar Kuantan - 11km *LAPANGAN TERBANG KUANTAN - 13km *PERLABUHAN KUANTAN ,MCKIP - 30kmYou may view Bandar Indera Mahkota Profile here.	Bandar Indera Mahkota	Kuantan	8	0	Bandar Indera Mahkota, Kuantan	3.82076	103.297	0	0	https://cdn.durianproperty.com.my/images/classified_ads/285691610836216.jpg	tell bryan saw ad durianproperty get best deal valley suite sqft peluang pelaburan dengan kos rendah tar university college jarak jalan berjalan kaki uia iium km kuantan medical centre km bandar kuantan km lapangan terbang kuantan km perlabuhan kuantan mckip kmyou may view bandar indera mahkota profile	tell bryan saw ad durianproperti get best deal valley suit sqft peluang pelaburan dengan ko rendah tar univers colleg jarak jalan berjalan kaki uia iium km kuantan medic centr km bandar kuantan km lapangan terbang kuantan km perlabuhan kuantan mckip kmyou may view bandar indera mahkota profil	['tell', 'bryan', 'saw', 'ad', 'durianproperti', 'get', 'best', 'deal', 'valley', 'suit', 'sqft', 'peluang', 'pelaburan', 'dengan', 'ko', 'rendah', 'tar', 'univers', 'colleg', 'jarak', 'jalan', 'berjalan', 'kaki', 'uia', 'iium', 'km', 'kuantan', 'medic', 'centr', 'km', 'bandar', 'kuantan', 'km', 'lapangan', 'terbang', 'kuantan', 'km', 'perlabuhan', 'kuantan', 'mckip', 'kmyou', 'may', 'view', 'ban…	0	notfake	285691610836216.jpg	285691610836216	285691610836216.jpg	FAKE	1	285691610836216.jpg	jpg
7723	0	7786	480000	1300	2	2	4	0	2	Tell Jan Chang you saw this ad from DurianProperty to get best deal.Anda hanya memerlukan RM500 untuk membeli kehidupan anda di masa akan datang seterusnya menjadikan anda dekat sini You may view Cheras Ria Profile here.	Cheras Ria	Cheras	0	0	Cheras Ria, Cheras	3.10291	101.751	0	0	https://cdn.durianproperty.com.my/images/classified_ads/304837312025156.png	tell jan chang saw ad durianproperty get best deal need rm buy life future make near may view cheras ria profile	tell jan chang saw ad durianproperti get best deal need rm buy life futur make near may view chera ria profil	['tell', 'jan', 'chang', 'saw', 'ad', 'durianproperti', 'get', 'best', 'deal', 'need', 'rm', 'buy', 'life', 'futur', 'make', 'near', 'may', 'view', 'chera', 'ria', 'profil']	0	notfake	304837312025156.png	304837312025156	304837312025156.png	FAKE	1	304837312025156.png	png
7855	0	7919	3180000	5000	5	0	5	0	5	Tell Azreen Bin Khalid you saw this ad from DurianProperty to get best deal.Prime Location Bungalow Plot at Taman Tasik Titiwangsa Kuala Lumpur ============================ Asking Price RM3,180,000 Contact Azreen Khalid 01128145900 ============================ Details: Size - 8997 sqft Freehold Status Foreign Owner Old bungalow structure demolished 100m next to lake Facing South Front facing towa…	Taman Tasik Titiwangsa	Titiwangsa	1	3	Taman Tasik Titiwangsa, Titiwangsa	3.17748	101.707	0	0	https://cdn.durianproperty.com.my/images/classified_ads/304322511991502.jpeg	tell azreen bin khalid saw ad durianproperty get best deal prime location bungalow plot taman tasik titiwangsa kuala lumpur asking price rm contact azreen khalid details size sqft freehold status foreign owner old bungalow structure demolished m next lake facing south front facing towards klcc nilai harta consultant sdn bhd bangi may view taman tasik titiwangsa profile	tell azreen bin khalid saw ad durianproperti get best deal prime locat bungalow plot taman tasik titiwangsa kuala lumpur ask price rm contact azreen khalid detail size sqft freehold statu foreign owner old bungalow structur demolish m next lake face south front face toward klcc nilai harta consult sdn bhd bangi may view taman tasik titiwangsa profil	['tell', 'azreen', 'bin', 'khalid', 'saw', 'ad', 'durianproperti', 'get', 'best', 'deal', 'prime', 'locat', 'bungalow', 'plot', 'taman', 'tasik', 'titiwangsa', 'kuala', 'lumpur', 'ask', 'price', 'rm', 'contact', 'azreen', 'khalid', 'detail', 'size', 'sqft', 'freehold', 'statu', 'foreign', 'owner', 'old', 'bungalow', 'structur', 'demolish', 'm', 'next', 'lake', 'face', 'south', 'front', 'face', 't…	0	notfake	304322511991502.jpeg	304322511991502	304322511991502.jpeg	FAKE	1	304322511991502.jpeg	jpeg
7874	0	7938	420000	1650	2	1	4	0	2	You may view Taman Nusa Bestari 2 Profile here.	Taman Nusa Bestari 2	Nusajaya	2	1	Taman Nusa Bestari 2, Nusajaya	1.49389	103.653	0	0	https://cdn.durianproperty.com.my/images/classified_ads/305087512043435.jpg	may view taman nusa bestari profile	may view taman nusa bestari profil	['may', 'view', 'taman', 'nusa', 'bestari', 'profil']	0	notfake	305087512043435.jpg	305087512043435	305087512043435.jpg	FAKE	1	305087512043435.jpg	jpg
8017	0	8081	673096	1195	2	0	4	0	2	Tell KEVIN LEE you saw this ad from DurianProperty to get best deal.Emerald Hills in Alam Damai, Cheras, Kuala Lumpur For Sale OFFICIAL LAUNCHING! *BUMI PRICE* *NON BUMI UNIT AVAILABLE* *Mystery Packages:Low Down Payment (Call For Details)* -Type A 1,195sf Corner Lot--3+1 Bedroom 2 Bathroom with Balcony 2 Car Park -RM5000 Booking Fee -5% Bumi Discount -S&P Legal & LOAN AGREEMENT Legal Fee Absorb …	Emerald Hills	Alam Damai	0	0	Emerald Hills, Alam Damai	3.06007	101.741	0	1	https://cdn.durianproperty.com.my/images/classified_ads/282401110663085.jpg	tell kevin lee saw ad durianproperty get best deal emerald hills alam damai cheras kuala lumpur sale official launching bumi price non bumi unit available mystery packages low payment call details type sf corner lot bedroom bathroom balcony car park rm booking fee bumi discount p legal loan agreement legal fee absorb developer free loan stamp duty free car park emerald hills alam damai cheras kua…	tell kevin lee saw ad durianproperti get best deal emerald hill alam damai chera kuala lumpur sale offici launch bumi price non bumi unit avail mysteri packag low payment call detail type sf corner lot bedroom bathroom balconi car park rm book fee bumi discount p legal loan agreement legal fee absorb develop free loan stamp duti free car park emerald hill alam damai chera kuala lumpur unit type t…	['tell', 'kevin', 'lee', 'saw', 'ad', 'durianproperti', 'get', 'best', 'deal', 'emerald', 'hill', 'alam', 'damai', 'chera', 'kuala', 'lumpur', 'sale', 'offici', 'launch', 'bumi', 'price', 'non', 'bumi', 'unit', 'avail', 'mysteri', 'packag', 'low', 'payment', 'call', 'detail', 'type', 'sf', 'corner', 'lot', 'bedroom', 'bathroom', 'balconi', 'car', 'park', 'rm', 'book', 'fee', 'bumi', 'discount', '…	0	notfake	282401110663085.jpg	282401110663085	282401110663085.jpg	FAKE	1	282401110663085.jpg	jpg
8019	0	8083	716040	832	1	1	2	1	1	Tell Glenn chin you saw this ad from DurianProperty to get best deal.JESSELTON TWIN TOWER 168 -56 Storey| 5 Star Condo @Damai, Kota Kinabalu -Luxury condo, 5 Star Rates‚≠êÔ∏è -360¬∞views | Mountain & Sea view -Using Top 4 branded specifications -Located in Damai, Luyang, Kota Kinabalu, near to Citymall. ============================================================ 10th Floor Resort Facility: -50M …	Jesselton Twin Towers	Kota Kinabalu	11	0	Jesselton Twin Towers, Kota Kinabalu	5.96616	116.098	0	0	https://cdn.durianproperty.com.my/images/classified_ads/299968411686391.jpg	tell glenn chin saw ad durianproperty get best deal jesselton twin tower storey star condo kota kinabalu luxury condo star rates views mountain sea view using top branded specifications located damai luyang kota kinabalu near citymall th floor resort facility m infinity swimming pool sauna steam room jacuzzi gymnasium splash pool function room dance studio lounge deck lawn garden storey higher fl…	tell glenn chin saw ad durianproperti get best deal jesselton twin tower storey star condo kota kinabalu luxuri condo star rate view mountain sea view use top brand specif locat damai luyang kota kinabalu near citymal th floor resort facil m infin swim pool sauna steam room jacuzzi gymnasium splash pool function room danc studio loung deck lawn garden storey higher floor kota kinabalu facil sky b…	['tell', 'glenn', 'chin', 'saw', 'ad', 'durianproperti', 'get', 'best', 'deal', 'jesselton', 'twin', 'tower', 'storey', 'star', 'condo', 'kota', 'kinabalu', 'luxuri', 'condo', 'star', 'rate', 'view', 'mountain', 'sea', 'view', 'use', 'top', 'brand', 'specif', 'locat', 'damai', 'luyang', 'kota', 'kinabalu', 'near', 'citymal', 'th', 'floor', 'resort', 'facil', 'm', 'infin', 'swim', 'pool', 'sauna',…	0	notfake	299968411686391.jpg	299968411686391	299968411686391.jpg	FAKE	1	299968411686391.jpg	jpg
8077	0	8142	1850000	87120	0	0	0	1	0	Tell William Property you saw this ad from DurianProperty to get best deal.Land for Sale: Lot 728, Dengkil, Selangor - 2 Acre @ RM1.85m - Leasehold until 2090 - Status : Agricultural - Zoned : Residential Features: - Strategic location, nearby Dengkil Bypass; Xiamen University & ERL Salak Tinggi - Flat & cleared Please contact William 014-3131931 before it is too late.You may view Dengkil Profile…	Dengkil	Selangor	0	5	Dengkil, Selangor	2.85939	101.679	0	0	https://cdn.durianproperty.com.my/images/classified_ads/300074611692644.jpg	tell william property saw ad durianproperty get best deal land sale lot dengkil selangor acre rm m leasehold status agricultural zoned residential features strategic location nearby dengkil bypass xiamen university erl salak tinggi flat cleared please contact william late may view dengkil profile	tell william properti saw ad durianproperti get best deal land sale lot dengkil selangor acr rm m leasehold statu agricultur zone residenti featur strateg locat nearbi dengkil bypass xiamen univers erl salak tinggi flat clear pleas contact william late may view dengkil profil	['tell', 'william', 'properti', 'saw', 'ad', 'durianproperti', 'get', 'best', 'deal', 'land', 'sale', 'lot', 'dengkil', 'selangor', 'acr', 'rm', 'm', 'leasehold', 'statu', 'agricultur', 'zone', 'residenti', 'featur', 'strateg', 'locat', 'nearbi', 'dengkil', 'bypass', 'xiamen', 'univers', 'erl', 'salak', 'tinggi', 'flat', 'clear', 'pleas', 'contact', 'william', 'late', 'may', 'view', 'dengkil', 'p…	0	notfake	300074611692644.jpg	300074611692644	300074611692644.jpg	FAKE	1	300074611692644.jpg	jpg
8147	0	8212	1300000	1905	4	0	4	0	2	You may view Kuala Lumpur Profile here.	Kuala Lumpur	Malaysia	0	0	Kuala Lumpur, Malaysia	3.13192	101.684	0	0	https://cdn.durianproperty.com.my/images/classified_ads/303594711938932.jpg	may view kuala lumpur profile	may view kuala lumpur profil	['may', 'view', 'kuala', 'lumpur', 'profil']	0	notfake	303594711938932.jpg	303594711938932	303594711938932.jpg	FAKE	1	303594711938932.jpg	jpg
8165	0	8230	680000	1602	3	2	4	1	3	Tell MOHD FAUZI MOHAMED you saw this ad from DurianProperty to get best deal.D‚ÄôPINES CONDO TAMAN NIRWANA FULLY FURNISHED AND FULLY RENOVATED FOR SALE UNIT & DEVELOPMENT CHARACTERISTICS Type: Condominium Tenure: Leasehold /Bumi Lot Master Title Built up : 1602sf Room : 4 Bath : 2 Furnishing : Fully Furnished Level : Middle Floor View : Kg Pandan Parking : 4 Maintenance Fee :RM0.20 Psf ADDITIONAL…	D'Pines	Ampang	1	0	D'Pines, Ampang	3.14067	101.75	0	0	https://cdn.durianproperty.com.my/images/classified_ads/300807811744455.jpg	tell mohd fauzi mohamed saw ad durianproperty get best deal pines condo taman nirwana fully furnished fully renovated sale unit development characteristics type condominium tenure leasehold bumi lot master title built sf room bath furnishing fully furnished level middle floor view kg pandan parking maintenance fee rm psf additional features plaster celling built wardrobe built kitchen cabinet air…	tell mohd fauzi moham saw ad durianproperti get best deal pine condo taman nirwana fulli furnish fulli renov sale unit develop characterist type condominium tenur leasehold bumi lot master titl built sf room bath furnish fulli furnish level middl floor view kg pandan park mainten fee rm psf addit featur plaster cell built wardrob built kitchen cabinet air cond water heater facil hour tier secur s…	['tell', 'mohd', 'fauzi', 'moham', 'saw', 'ad', 'durianproperti', 'get', 'best', 'deal', 'pine', 'condo', 'taman', 'nirwana', 'fulli', 'furnish', 'fulli', 'renov', 'sale', 'unit', 'develop', 'characterist', 'type', 'condominium', 'tenur', 'leasehold', 'bumi', 'lot', 'master', 'titl', 'built', 'sf', 'room', 'bath', 'furnish', 'fulli', 'furnish', 'level', 'middl', 'floor', 'view', 'kg', 'pandan', '…	0	notfake	300807811744455.jpg	300807811744455	300807811744455.jpg	FAKE	1	300807811744455.jpg	jpg
8329	0	8395	290000	600	1	1	2	1	2	Tell Gavin Lau you saw this ad from DurianProperty to get best deal.*** LOW DENSITY (335 units only )*** ONLY RM500 BOOKING FEE TO OWN A CONDOMINIUM NEAR TO UKM BANGI SELANGOR GOOD FOR INVESTMENT EARLY BIRD PROMOTION ********************************* 1) ZERO DOWM PAYMENT 2) DISCOUNT 10% 3) FREE 2 Parking Lot 4) FREE SPA Legal Fee 5) FREE Loan Legal Fee 6) FREE Kitchen Cabinet * 2-4 Bedrooms / 1-2…	Bangi Avenue	Bangi	0	0	Bangi Avenue, Bangi	2.9012	101.8	0	0	https://cdn.durianproperty.com.my/images/classified_ads/300284611706372.jpg	tell gavin lau saw ad durianproperty get best deal low density units rm booking fee condominium near ukm bangi selangor good investment early bird promotion zero dowm payment discount free parking lot free spa legal fee free loan legal fee free kitchen cabinet bedrooms bathroom free parking lots price starting rmk full condominium facilities swimming pool gymnasium cafeteria garden etc near ukm b…	tell gavin lau saw ad durianproperti get best deal low densiti unit rm book fee condominium near ukm bangi selangor good invest earli bird promot zero dowm payment discount free park lot free spa legal fee free loan legal fee free kitchen cabinet bedroom bathroom free park lot price start rmk full condominium facil swim pool gymnasium cafeteria garden etc near ukm bangi kpt mara german malaysia i…	['tell', 'gavin', 'lau', 'saw', 'ad', 'durianproperti', 'get', 'best', 'deal', 'low', 'densiti', 'unit', 'rm', 'book', 'fee', 'condominium', 'near', 'ukm', 'bangi', 'selangor', 'good', 'invest', 'earli', 'bird', 'promot', 'zero', 'dowm', 'payment', 'discount', 'free', 'park', 'lot', 'free', 'spa', 'legal', 'fee', 'free', 'loan', 'legal', 'fee', 'free', 'kitchen', 'cabinet', 'bedroom', 'bathroom',…	0	notfake	300284611706372.jpg	300284611706372	300284611706372.jpg	FAKE	1	300284611706372.jpg	jpg
8357	0	8423	396096	1010	2	1	3	0	2	Tell KEVIN LEE you saw this ad from DurianProperty to get best deal.LakeFront Homes in Cyberjaya, Selengor For Sale NEW TOWER OFFICIAL LAUNCHING * EXCLUSIVE SERVICE & SURPRISE FOR YOU !* - FREE CONSULT - Bank Loan Advisory - First Home Buyer Guide Line - Feng-Shui Units Number Advisory - & More & More & More...... *Our Team & Partners provide:* - Sell/Rent Service After Completion - ID Design, Re…	Lakefront Residence	Cyberjaya	7	0	Lakefront Residence, Cyberjaya	2.93295	101.643	0	1	https://cdn.durianproperty.com.my/images/classified_ads/289246811015561.jpg	tell kevin lee saw ad durianproperty get best deal lakefront homes cyberjaya selengor sale new tower official launching exclusive service surprise free consult bank loan advisory first home buyer guide line feng shui units number advisory team partners provide sell rent service completion id design renovation furniture team feng shui advisory please contact lakefront homes specialist mystery pack…	tell kevin lee saw ad durianproperti get best deal lakefront home cyberjaya selengor sale new tower offici launch exclus servic surpris free consult bank loan advisori first home buyer guid line feng shui unit number advisori team partner provid sell rent servic complet id design renov furnitur team feng shui advisori pleas contact lakefront home specialist mysteri packag super low payment call d…	['tell', 'kevin', 'lee', 'saw', 'ad', 'durianproperti', 'get', 'best', 'deal', 'lakefront', 'home', 'cyberjaya', 'selengor', 'sale', 'new', 'tower', 'offici', 'launch', 'exclus', 'servic', 'surpris', 'free', 'consult', 'bank', 'loan', 'advisori', 'first', 'home', 'buyer', 'guid', 'line', 'feng', 'shui', 'unit', 'number', 'advisori', 'team', 'partner', 'provid', 'sell', 'rent', 'servic', 'complet'…	0	notfake	289246811015561.jpg	289246811015561	289246811015561.jpg	FAKE	1	289246811015561.jpg	jpg
8411	0	8477	288000	571	1	1	1	0	1	Tell Rinja you saw this ad from DurianProperty to get best deal.This is a LIMITED unit of Studio type at the block. NEW Studio. ÂÖ®Êñ∞, ÂπøÈòî * ONLY one unit of Studio layout at every each floor. * Facing South, UPM greenery view, situated at High floor. * LARGE Rectangle size, Spacious studio. . * Partial furnished. * CONVENIENCE location car park bay, covered, easy access to Elevator and entra…	SK One Residence	Seri Kembangan	0	0	SK One Residence, Seri Kembangan	3.01366	101.699	1	0	https://cdn.durianproperty.com.my/images/classified_ads/273743810861418.jpg	tell rinja saw ad durianproperty get best deal limited unit studio type block new studio one unit studio layout every floor facing south upm greenery view situated high floor large rectangle size spacious studio partial furnished convenience location car park bay covered easy access elevator entrance exit gate ideal unit couple single strategic convenience location studio size lesser maintenance …	tell rinja saw ad durianproperti get best deal limit unit studio type block new studio one unit studio layout everi floor face south upm greeneri view situat high floor larg rectangl size spaciou studio partial furnish conveni locat car park bay cover easi access elev entranc exit gate ideal unit coupl singl strateg conveni locat studio size lesser mainten servic fee free hold land titl educ inst…	['tell', 'rinja', 'saw', 'ad', 'durianproperti', 'get', 'best', 'deal', 'limit', 'unit', 'studio', 'type', 'block', 'new', 'studio', 'one', 'unit', 'studio', 'layout', 'everi', 'floor', 'face', 'south', 'upm', 'greeneri', 'view', 'situat', 'high', 'floor', 'larg', 'rectangl', 'size', 'spaciou', 'studio', 'partial', 'furnish', 'conveni', 'locat', 'car', 'park', 'bay', 'cover', 'easi', 'access', 'e…	0	notfake	273743810861418.jpg	273743810861418	273743810861418.jpg	FAKE	1	273743810861418.jpg	jpg
8430	0	8496	299000	878	2	1	3	0	2	Tell Thomes Ng you saw this ad from DurianProperty to get best deal.Good Feng Shui Strategy Site: NO High Tension Cable Beside NO Cemetary and Tomb Beside NO RUMAHWIP Beside NO Oxidic Pond NO Highway Flyover Beside NOT Mining Land) Project Advantages: ------Greenery Theme Concept------ Multiple Height Garden Entrances Rain Forests Harvesting System 1 Arce Garden Themepark Garbage Disposal System …	M Arisa	Sentul	1	0	M Arisa, Sentul	3.20302	101.69	0	0	https://cdn.durianproperty.com.my/images/classified_ads/300238111703495.jpeg	tell thomes ng saw ad durianproperty get best deal good feng shui strategy site high tension cable beside cemetary tomb beside rumahwip beside oxidic pond highway flyover beside mining land project advantages greenery theme concept multiple height garden entrances rain forests harvesting system arce garden themepark garbage disposal system natural cooling systems lagoon pool forest park sky garde…	tell thome ng saw ad durianproperti get best deal good feng shui strategi site high tension cabl besid cemetari tomb besid rumahwip besid oxid pond highway flyover besid mine land project advantag greeneri theme concept multipl height garden entranc rain forest harvest system arc garden themepark garbag dispos system natur cool system lagoon pool forest park sky garden park ev car charger sell po…	['tell', 'thome', 'ng', 'saw', 'ad', 'durianproperti', 'get', 'best', 'deal', 'good', 'feng', 'shui', 'strategi', 'site', 'high', 'tension', 'cabl', 'besid', 'cemetari', 'tomb', 'besid', 'rumahwip', 'besid', 'oxid', 'pond', 'highway', 'flyover', 'besid', 'mine', 'land', 'project', 'advantag', 'greeneri', 'theme', 'concept', 'multipl', 'height', 'garden', 'entranc', 'rain', 'forest', 'harvest', 's…	0	notfake	300238111703495.jpeg	300238111703495	300238111703495.jpeg	FAKE	1	300238111703495.jpeg	jpeg
8437	0	8503	720096	990	2	1	4	1	3	Tell KEVIN LEE you saw this ad from DurianProperty to get best deal.Ryan & Miho at PJ S13 Section 13 Petaling Jaya Selangor For Sale Developed by TOP DEVELOPER OSK GROUP HOC 2019 (HOME OWNERSHIP CAMPAIGN) FREE MOT & LOAN STAMP DUTY FOR ALL BUYERS *FREE IPHONE 11 128GB* *BUMI PRICE* *NON BUMI UNIT AVAILABLE* *Mystery Packages: Low Down Payment (Call For Details)* -RM1,000 Booking Fee (REFUNDABLE) …	Ryan Miho	Section 13	0	0	Ryan Miho, Section 13	3.11861	101.635	0	1	https://cdn.durianproperty.com.my/images/classified_ads/294587611324340.jpg	tell kevin lee saw ad durianproperty get best deal ryan miho pj s section petaling jaya selangor sale developed top developer osk group hoc home ownership campaign free mot loan stamp duty buyers free iphone gb bumi price non bumi unit available mystery packages low payment call details rm booking fee refundable special promotion packages upon request bumi discount fre p legal loan agreement lega…	tell kevin lee saw ad durianproperti get best deal ryan miho pj s section petal jaya selangor sale develop top develop osk group hoc home ownership campaign free mot loan stamp duti buyer free iphon gb bumi price non bumi unit avail mysteri packag low payment call detail rm book fee refund special promot packag upon request bumi discount fre p legal loan agreement legal fee free mot free loan sta…	['tell', 'kevin', 'lee', 'saw', 'ad', 'durianproperti', 'get', 'best', 'deal', 'ryan', 'miho', 'pj', 's', 'section', 'petal', 'jaya', 'selangor', 'sale', 'develop', 'top', 'develop', 'osk', 'group', 'hoc', 'home', 'ownership', 'campaign', 'free', 'mot', 'loan', 'stamp', 'duti', 'buyer', 'free', 'iphon', 'gb', 'bumi', 'price', 'non', 'bumi', 'unit', 'avail', 'mysteri', 'packag', 'low', 'payment', …	0	notfake	294587611324340.jpg	294587611324340	294587611324340.jpg	FAKE	1	294587611324340.jpg	jpg
8491	0	8559	860000	1663	3	1	4	0	3	Tell nicole lee you saw this ad from DurianProperty to get best deal.Le Yuan Residence, Kuchai Lama ** Low Density, Luxury 5 Star Facilities ** PRICE: RM 860,000 Only CALL/Whatsapp : 018-2782862 Irene Lee *****Serious Buyer Are Welcome***** House Features : Size : 1,663 3+1 Bedroom 3 Bathroom 3 Carpark Freehold Facing Pool View Le Yuan Residence is located along Jalan 6/127a, Off Jalan Senang Ria…	Le Yuan Residence	Kuchai Lama	1	0	Le Yuan Residence, Kuchai Lama	3.07905	101.689	0	0	https://cdn.durianproperty.com.my/images/classified_ads/302508011865818.JPG	tell nicole lee saw ad durianproperty get best deal le yuan residence kuchai lama low density luxury star facilities price rm call whatsapp irene lee serious buyer welcome house features size bedroom bathroom carpark freehold facing pool view le yuan residence located along jalan a jalan senang ria happy garden kuchai lama kuala lumpur freehold high rise condominium development housing units amen…	tell nicol lee saw ad durianproperti get best deal le yuan resid kuchai lama low densiti luxuri star facil price rm call whatsapp iren lee seriou buyer welcom hous featur size bedroom bathroom carpark freehold face pool view le yuan resid locat along jalan a jalan senang ria happi garden kuchai lama kuala lumpur freehold high rise condominium develop hous unit amen near condominium includ sport c…	['tell', 'nicol', 'lee', 'saw', 'ad', 'durianproperti', 'get', 'best', 'deal', 'le', 'yuan', 'resid', 'kuchai', 'lama', 'low', 'densiti', 'luxuri', 'star', 'facil', 'price', 'rm', 'call', 'whatsapp', 'iren', 'lee', 'seriou', 'buyer', 'welcom', 'hous', 'featur', 'size', 'bedroom', 'bathroom', 'carpark', 'freehold', 'face', 'pool', 'view', 'le', 'yuan', 'resid', 'locat', 'along', 'jalan', 'a', 'jal…	0	notfake	302508011865818.JPG	302508011865818	302508011865818.JPG	FAKE	1	302508011865818.JPG	JPG
8545	0	8613	468000	1065	2	0	4	1	2	Tell Cherry Fu you saw this ad from DurianProperty to get best deal.Please contact CHERRY Fu @ 012-668 2596 for viewing and more info. KL Triangle Golden Place New Launch Project Only RM468k onward!!! HOT SELLING!!! LAST 50 Units!!! =========================================================== Hot Selling & Below Market Price Project in KL Town Area * ROI up to 7%+ high return good for investment *…	Platinum Splendor	Kuala Lumpur	1	0	Platinum Splendor, Kuala Lumpur	3.1808	101.725	0	0	https://cdn.durianproperty.com.my/images/classified_ads/283471110777538.jpg	tell cherry fu saw ad durianproperty get best deal please contact cherry fu viewing info kl triangle golden place new launch project rmk onward hot selling last units hot selling market price project kl town area roi high return good investment r b balcony rmpsf rm dream house top developer early bird promotion entry fee extra bumi free spa legal fee free loan legal fee free stamp duty free car p…	tell cherri fu saw ad durianproperti get best deal pleas contact cherri fu view info kl triangl golden place new launch project rmk onward hot sell last unit hot sell market price project kl town area roi high return good invest r b balconi rmpsf rm dream hous top develop earli bird promot entri fee extra bumi free spa legal fee free loan legal fee free stamp duti free car park luxuri facil roof …	['tell', 'cherri', 'fu', 'saw', 'ad', 'durianproperti', 'get', 'best', 'deal', 'pleas', 'contact', 'cherri', 'fu', 'view', 'info', 'kl', 'triangl', 'golden', 'place', 'new', 'launch', 'project', 'rmk', 'onward', 'hot', 'sell', 'last', 'unit', 'hot', 'sell', 'market', 'price', 'project', 'kl', 'town', 'area', 'roi', 'high', 'return', 'good', 'invest', 'r', 'b', 'balconi', 'rmpsf', 'rm', 'dream', '…	0	notfake	283471110777538.jpg	283471110777538	283471110777538.jpg	FAKE	1	283471110777538.jpg	jpg
8554	0	8622	200000	43560	0	0	0	1	0	Tell Hannah you saw this ad from DurianProperty to get best deal.RM200K PER ACRE AGRICULTURAL LAND IN MUKIM PENGERANG, JOHOR UP FOR AUCTION SALE Get this land and wait for its value to appreciate! The 1-acre land is located in Mukim Pengerang, which is currently home to rapid petronas, malaysia\'s new oil and gas facility. As the land is within the high growth area of pengerang, wait until its va…	Pengerang	Johor	2	5	Pengerang, Johor	1.3647	104.111	0	0	https://cdn.durianproperty.com.my/images/classified_ads/304055411969552.jpg	tell hannah saw ad durianproperty get best deal rmk per acre agricultural land mukim pengerang johor auction sale get land wait value appreciate acre land located mukim pengerang currently home rapid petronas malaysia new oil gas facility land within high growth area pengerang wait value appreciate upcoming oil gas project expansion well new infrastructure coming moreover plan future road linking…	tell hannah saw ad durianproperti get best deal rmk per acr agricultur land mukim pengerang johor auction sale get land wait valu appreci acr land locat mukim pengerang current home rapid petrona malaysia new oil ga facil land within high growth area pengerang wait valu appreci upcom oil ga project expans well new infrastructur come moreov plan futur road link senai desaru highway directli rapid …	['tell', 'hannah', 'saw', 'ad', 'durianproperti', 'get', 'best', 'deal', 'rmk', 'per', 'acr', 'agricultur', 'land', 'mukim', 'pengerang', 'johor', 'auction', 'sale', 'get', 'land', 'wait', 'valu', 'appreci', 'acr', 'land', 'locat', 'mukim', 'pengerang', 'current', 'home', 'rapid', 'petrona', 'malaysia', 'new', 'oil', 'ga', 'facil', 'land', 'within', 'high', 'growth', 'area', 'pengerang', 'wait', …	0	notfake	304055411969552.jpg	304055411969552	304055411969552.jpg	FAKE	1	304055411969552.jpg	jpg
8563	0	8631	265000	850	2	0	3	0	2	Tell Alvin Lau you saw this ad from DurianProperty to get best deal.Kenapa masih nak sewa rumah lagi bila anda boleh memiliki rumah idaman anda ?? Gaji bersih dalam RM2,500 keatas sudah layak beli Bayaran bulanan dalam RM1,000 sahaja Tarikh Siap Q3/2022 Harga rumah RM235,000 & RM265,000 (Termasuk 2 car park) TERBUKA KEPADA KAKITANGAN KERAJAAN DAN SWASTA ANDA BOLEH BUAT SEMAKAN KELAYAKAN JIKA BERM…	Acacia Residences	Sepang	0	0	Acacia Residences, Sepang	2.83518	101.739	0	0	https://cdn.durianproperty.com.my/images/classified_ads/302230711844413.png	tell alvin lau saw ad durianproperty get best deal still rent house dream house net salary rm eligible buy monthly payment rm completion date q house price rm rm including car parks open government private employees eligibility check interested selangorku housing project affordable salak perdana sepang without paying deposit low density advance money full loan price rm free legal fees freehold fr…	tell alvin lau saw ad durianproperti get best deal still rent hous dream hous net salari rm elig buy monthli payment rm complet date q hous price rm rm includ car park open govern privat employe elig check interest selangorku hous project afford salak perdana sepang without pay deposit low densiti advanc money full loan price rm free legal fee freehold freehold freehold freehold area bedroom bath…	['tell', 'alvin', 'lau', 'saw', 'ad', 'durianproperti', 'get', 'best', 'deal', 'still', 'rent', 'hous', 'dream', 'hous', 'net', 'salari', 'rm', 'elig', 'buy', 'monthli', 'payment', 'rm', 'complet', 'date', 'q', 'hous', 'price', 'rm', 'rm', 'includ', 'car', 'park', 'open', 'govern', 'privat', 'employe', 'elig', 'check', 'interest', 'selangorku', 'hous', 'project', 'afford', 'salak', 'perdana', 'se…	0	notfake	302230711844413.png	302230711844413	302230711844413.png	FAKE	1	302230711844413.png	png
8611	0	8679	1100000	1985	4	2	3	0	2	Tell Noor Khasnizah Uri you saw this ad from DurianProperty to get best deal.20Trees Taman Melawati - High End Condo [Fully Furnished] Contact: Noor Khasnizah - 016-231 5820 / 016-613 5820 - Mohd Salami Chin * Prestigious & Exclusive High End Condo (Low-Rise 4 Levels) * Wonderful Greeneries Surrounding * Low Density & Peaceful Environment * Fully Furnished With Individual Lift & Two Own Covered P…	20trees	Melawati	0	0	20trees, Melawati	3.21955	101.752	0	0	https://cdn.durianproperty.com.my/images/classified_ads/301216911771579.jpeg	tell noor khasnizah uri saw ad durianproperty get best deal trees taman melawati high end condo fully furnished contact noor khasnizah mohd salami chin prestigious exclusive high end condo low rise levels wonderful greeneries surrounding low density peaceful environment fully furnished individual lift two covered parking lots clubhouse facilities including swimming pool tennis court gym bbq area …	tell noor khasnizah uri saw ad durianproperti get best deal tree taman melawati high end condo fulli furnish contact noor khasnizah mohd salami chin prestigi exclus high end condo low rise level wonder greeneri surround low densiti peac environ fulli furnish individu lift two cover park lot clubhous facil includ swim pool tenni court gym bbq area multipurpos hall hour secur easi access manag offi…	['tell', 'noor', 'khasnizah', 'uri', 'saw', 'ad', 'durianproperti', 'get', 'best', 'deal', 'tree', 'taman', 'melawati', 'high', 'end', 'condo', 'fulli', 'furnish', 'contact', 'noor', 'khasnizah', 'mohd', 'salami', 'chin', 'prestigi', 'exclus', 'high', 'end', 'condo', 'low', 'rise', 'level', 'wonder', 'greeneri', 'surround', 'low', 'densiti', 'peac', 'environ', 'fulli', 'furnish', 'individu', 'lif…	0	notfake	301216911771579.jpeg	301216911771579	301216911771579.jpeg	FAKE	1	301216911771579.jpeg	jpeg
8703	0	8771	600000	2415	4	0	4	1	3	Tell Edward Soh you saw this ad from DurianProperty to get best deal.X2 Residency, Taman Putra Prima Puchong. Description X2 Residency > > Semi-D (40x60) Condo at Taman Putra Prima Puchong ** X2 Meaning everything Extra X 2 SPACIOUS ** Most Value, Space & Livability Condominium@ Puchong ** Serenity + Spacious + Peaceful + Nice View + Greenery ENVIRONMENT ** Set within 7.99 acres of Prime Land >> …	X2 Residency	Puchong	0	0	X2 Residency, Puchong	2.96541	101.593	0	0	https://cdn.durianproperty.com.my/images/classified_ads/300290111706741.jpg	tell edward soh saw ad durianproperty get best deal x residency taman putra prima puchong description x residency semi x condo taman putra prima puchong x meaning everything extra x spacious value space livability condominium puchong serenity spacious peaceful nice view greenery environment set within acres prime land low density build sell ready move space x fun x value x lowest price town limit…	tell edward soh saw ad durianproperti get best deal x resid taman putra prima puchong descript x resid semi x condo taman putra prima puchong x mean everyth extra x spaciou valu space livabl condominium puchong seren spaciou peac nice view greeneri environ set within acr prime land low densiti build sell readi move space x fun x valu x lowest price town limitless enjoy whole new way close acr lan…	['tell', 'edward', 'soh', 'saw', 'ad', 'durianproperti', 'get', 'best', 'deal', 'x', 'resid', 'taman', 'putra', 'prima', 'puchong', 'descript', 'x', 'resid', 'semi', 'x', 'condo', 'taman', 'putra', 'prima', 'puchong', 'x', 'mean', 'everyth', 'extra', 'x', 'spaciou', 'valu', 'space', 'livabl', 'condominium', 'puchong', 'seren', 'spaciou', 'peac', 'nice', 'view', 'greeneri', 'environ', 'set', 'with…	0	notfake	300290111706741.jpg	300290111706741	300290111706741.jpg	FAKE	1	300290111706741.jpg	jpg
8744	0	8813	450096	850	2	0	3	0	1	Tell KEVIN LEE you saw this ad from DurianProperty to get best deal.NEW BLOCK TOWER A OFFICIAL LAUNCHING! M Centura at Sentul,KL City For Sale *Mystery Packages:Low Down Payment (Call For Details)* -RM1000 Own a property -SPECIAL PROMOTIONAL PACKAGE AVAILABLE UPON REQUEST -S&P Legal & LOAN AGREEMENT Legal Fee Absorb by developer -FREE LOAN STAMP DUTY -FREE 1/2 Car Park For More Information or int…	M Centura	Sentul	1	0	M Centura, Sentul	3.20376	101.69	0	1	https://cdn.durianproperty.com.my/images/classified_ads/278996010488003.jpg	tell kevin lee saw ad durianproperty get best deal new block tower official launching centura sentul kl city sale mystery packages low payment call details rm property special promotional package available upon request p legal loan agreement legal fee absorb developer free loan stamp duty free car park information interest view centura show unit please kindly call us kevin centura affordable luxu…	tell kevin lee saw ad durianproperti get best deal new block tower offici launch centura sentul kl citi sale mysteri packag low payment call detail rm properti special promot packag avail upon request p legal loan agreement legal fee absorb develop free loan stamp duti free car park inform interest view centura show unit pleas kindli call us kevin centura afford luxuri live live close citi even c…	['tell', 'kevin', 'lee', 'saw', 'ad', 'durianproperti', 'get', 'best', 'deal', 'new', 'block', 'tower', 'offici', 'launch', 'centura', 'sentul', 'kl', 'citi', 'sale', 'mysteri', 'packag', 'low', 'payment', 'call', 'detail', 'rm', 'properti', 'special', 'promot', 'packag', 'avail', 'upon', 'request', 'p', 'legal', 'loan', 'agreement', 'legal', 'fee', 'absorb', 'develop', 'free', 'loan', 'stamp', '…	0	notfake	278996010488003.jpg	278996010488003	278996010488003.jpg	FAKE	1	278996010488003.jpg	jpg
8992	0	9062	850000	875	1	0	2	0	1	Tell janice tan you saw this ad from DurianProperty to get best deal.Serviced Residence NOVUM Kampung Kerinchi Bangsar South for Sale NOVUM @ Bangsar South (Brand New) Unit details: - 872sf - Freehold - 2 bedrooms 2 bathrooms 1 car park - Balcony unit - high Floor - KL View - facing east Key Highlights: -Good for rental investment, Surrounded by MSC status office buildings - 5 mins walk to kerinc…	Novum	Bangsar South	1	0	Novum, Bangsar South	3.11316	101.667	0	0	https://cdn.durianproperty.com.my/images/classified_ads/297479811521249.jpg	tell janice tan saw ad durianproperty get best deal serviced residence novum kampung kerinchi bangsar south sale novum bangsar south brand new unit details sf freehold bedrooms bathrooms car park balcony unit high floor kl view facing east key highlights good rental investment surrounded msc status office buildings mins walk kerinci lrt station mins walk kl gateway mall sale rm please call janice…	tell janic tan saw ad durianproperti get best deal servic resid novum kampung kerinchi bangsar south sale novum bangsar south brand new unit detail sf freehold bedroom bathroom car park balconi unit high floor kl view face east key highlight good rental invest surround msc statu offic build min walk kerinci lrt station min walk kl gateway mall sale rm pleas call janic view pleas call janic view p…	['tell', 'janic', 'tan', 'saw', 'ad', 'durianproperti', 'get', 'best', 'deal', 'servic', 'resid', 'novum', 'kampung', 'kerinchi', 'bangsar', 'south', 'sale', 'novum', 'bangsar', 'south', 'brand', 'new', 'unit', 'detail', 'sf', 'freehold', 'bedroom', 'bathroom', 'car', 'park', 'balconi', 'unit', 'high', 'floor', 'kl', 'view', 'face', 'east', 'key', 'highlight', 'good', 'rental', 'invest', 'surroun…	0	notfake	297479811521249.jpg	297479811521249	297479811521249.jpg	FAKE	1	297479811521249.jpg	jpg
9037	0	9107	306100	850	2	1	3	0	2	Tell Raduan Jemain you saw this ad from DurianProperty to get best deal.ACACIA RESIDENCES @ SALAK PERDANA SEPANG:house::house: Project : Acacia Residence Lokasi: Salak Perdana, Sepang Tenure : Freehold Booking fee : *RM500* Starting price : RM3++k Unit type:- 3 Room 2 Bath 850sqft Security System 24 Hours Security 3 Tier Security Smart Card System Facilities & Services Swimming Pool Changing Room…	Acacia Residences	Sepang	0	0	Acacia Residences, Sepang	2.83518	101.739	0	0	https://cdn.durianproperty.com.my/images/classified_ads/301045811758809.jpg	tell raduan jemain saw ad durianproperty get best deal acacia residences salak perdana sepang house house project acacia residence lokasi salak perdana sepang tenure freehold booking fee rm starting price rm k unit type room bath sqft security system hours security tier security smart card system facilities services swimming pool changing room male female children playground surau male female lan…	tell raduan jemain saw ad durianproperti get best deal acacia resid salak perdana sepang hous hous project acacia resid lokasi salak perdana sepang tenur freehold book fee rm start price rm k unit type room bath sqft secur system hour secur tier secur smart card system facil servic swim pool chang room male femal children playground surau male femal landscap garden manag offic mini market cafe la…	['tell', 'raduan', 'jemain', 'saw', 'ad', 'durianproperti', 'get', 'best', 'deal', 'acacia', 'resid', 'salak', 'perdana', 'sepang', 'hous', 'hous', 'project', 'acacia', 'resid', 'lokasi', 'salak', 'perdana', 'sepang', 'tenur', 'freehold', 'book', 'fee', 'rm', 'start', 'price', 'rm', 'k', 'unit', 'type', 'room', 'bath', 'sqft', 'secur', 'system', 'hour', 'secur', 'tier', 'secur', 'smart', 'card', …	0	notfake	301045811758809.jpg	301045811758809	301045811758809.jpg	FAKE	1	301045811758809.jpg	jpg
9192	0	9262	595000	950	2	0	3	1	2	Tell keithchew82 you saw this ad from DurianProperty to get best deal.Keith 019-2668692 Keith 019-2668692 Keith 019-2668692 >Well kept >Below market price >High rental return >Near amenities area >Easy access *** This property is arguably one of the best in its range a MUST view *** * Good Property for Own Stay / Investment . * easy access near to town . * Photo is just for a DISPLAY to protect o…	Sentrio Suites	Desa Pandan	1	0	Sentrio Suites, Desa Pandan	3.14828	101.737	0	0	https://cdn.durianproperty.com.my/images/classified_ads/302391211857269.PNG	tell keithchew saw ad durianproperty get best deal keith keith keith well kept market price high rental return near amenities area easy access property arguably one best range must view good property stay investment easy access near town photo display protect owner tenant privacy pictures shown might actual unit illustration purpose appreciate view appointment personalized presentation please con…	tell keithchew saw ad durianproperti get best deal keith keith keith well kept market price high rental return near amen area easi access properti arguabl one best rang must view good properti stay invest easi access near town photo display protect owner tenant privaci pictur shown might actual unit illustr purpos appreci view appoint person present pleas contact would pleasur serv pleas call sm …	['tell', 'keithchew', 'saw', 'ad', 'durianproperti', 'get', 'best', 'deal', 'keith', 'keith', 'keith', 'well', 'kept', 'market', 'price', 'high', 'rental', 'return', 'near', 'amen', 'area', 'easi', 'access', 'properti', 'arguabl', 'one', 'best', 'rang', 'must', 'view', 'good', 'properti', 'stay', 'invest', 'easi', 'access', 'near', 'town', 'photo', 'display', 'protect', 'owner', 'tenant', 'privac…	1	fake	302391211857269.PNG	302391211857269	302391211857269.PNG	FAKE	1	302391211857269.PNG	PNG
9199	0	9269	220000	1055	2	0	4	1	3	You may view Taman Equine Profile here.	Taman Equine	Seri Kembangan	0	0	Taman Equine, Seri Kembangan	3.00302	101.679	0	1	https://cdn.durianproperty.com.my/images/classified_ads/300429911716268.jpg	may view taman equine profile	may view taman equin profil	['may', 'view', 'taman', 'equin', 'profil']	0	notfake	300429911716268.jpg	300429911716268	300429911716268.jpg	FAKE	1	300429911716268.jpg	jpg
9201	0	9271	598000	2400	4	1	6	0	3	Tell Mazurul you saw this ad from DurianProperty to get best deal.Taman Pulai Indah Semi D Cluster International Lot For Sale Taman Pulai Indah Jln PI 2 / 3 Cluster house Non bumi lot, International lot Land area 35 x 65 6 bedrooms 4 bathroom Price RM598k Market value RM650K Had done plaster ceiling Consile aircond No Guarded 0 1 8 7 7 7 0 7 1 5 p/s ; Wanna Extra Income ?? Refer your Friend/Neigb…	Taman Pulai Indah	Pulai	2	2	Taman Pulai Indah, Pulai	1.54119	103.582	0	0	https://cdn.durianproperty.com.my/images/classified_ads/304428411999047.jpeg	tell mazurul saw ad durianproperty get best deal taman pulai indah semi cluster international lot sale taman pulai indah jln pi cluster house non bumi lot international lot land area x bedrooms bathroom price rmk market value rmk done plaster ceiling consile aircond guarded p want to extra income refer friend neigbour relative want to sell let buy property contact you are interested kindly contac…	tell mazurul saw ad durianproperti get best deal taman pulai indah semi cluster intern lot sale taman pulai indah jln pi cluster hous non bumi lot intern lot land area x bedroom bathroom price rmk market valu rmk done plaster ceil consil aircond guard p want to extra incom refer friend neigbour rel want to sell let buy properti contact you are interest kindli contact detail name mazurul phone ema…	['tell', 'mazurul', 'saw', 'ad', 'durianproperti', 'get', 'best', 'deal', 'taman', 'pulai', 'indah', 'semi', 'cluster', 'intern', 'lot', 'sale', 'taman', 'pulai', 'indah', 'jln', 'pi', 'cluster', 'hous', 'non', 'bumi', 'lot', 'intern', 'lot', 'land', 'area', 'x', 'bedroom', 'bathroom', 'price', 'rmk', 'market', 'valu', 'rmk', 'done', 'plaster', 'ceil', 'consil', 'aircond', 'guard', 'p', 'want', '…	0	notfake	304428411999047.jpeg	304428411999047	304428411999047.jpeg	FAKE	1	304428411999047.jpeg	jpeg
9287	0	9357	530000	864	2	1	3	1	2	Tell Lim wai mun you saw this ad from DurianProperty to get best deal.Luxury Condo @ Seri Kembangan/Serdang __First Township Development along the Seri Kembangan__ ** Condominium ** Total 12 acres land with only 2 Block Residence Affordable Medium end Condominium with Gated & Guarded,Access card system,24 hours security ** Shopping Mall ** Vibrant Lifestyle Mall that comprise F&B, Grocery market,…	Meta City	Seri Kembangan	0	0	Meta City, Seri Kembangan	2.98273	101.661	0	0	https://cdn.durianproperty.com.my/images/classified_ads/300918411750369.png	tell lim wai mun saw ad durianproperty get best deal luxury condo seri kembangan serdang first township development along seri kembangan condominium total acres land block residence affordable medium end condominium gated guarded access card system hours security shopping mall vibrant lifestyle mall comprise f b grocery market retails shop entertainment cinema ice skating etc concept similar ioi …	tell lim wai mun saw ad durianproperti get best deal luxuri condo seri kembangan serdang first township develop along seri kembangan condominium total acr land block resid afford medium end condominium gate guard access card system hour secur shop mall vibrant lifestyl mall compris f b groceri market retail shop entertain cinema ice skate etc concept similar ioi citi mall brand star intern hotel …	['tell', 'lim', 'wai', 'mun', 'saw', 'ad', 'durianproperti', 'get', 'best', 'deal', 'luxuri', 'condo', 'seri', 'kembangan', 'serdang', 'first', 'township', 'develop', 'along', 'seri', 'kembangan', 'condominium', 'total', 'acr', 'land', 'block', 'resid', 'afford', 'medium', 'end', 'condominium', 'gate', 'guard', 'access', 'card', 'system', 'hour', 'secur', 'shop', 'mall', 'vibrant', 'lifestyl', 'm…	0	notfake	300918411750369.png	300918411750369	300918411750369.png	FAKE	1	300918411750369.png	png
9366	0	9436	300000	1052	3	1	3	0	2	Tell Hafiz Halim you saw this ad from DurianProperty to get best deal.OPEN FOR BOOKING New Developed Apartment in Puchong Intan Officially launch February 2021 (FULL LOAN) Booking RM500 ONLY (Bankers Cheque Only) Deposit RM3000 if prefer to lock unit FREE SPA Legal Fees Free MOT Details of the unit: - Developer : (Reputable Developer develop many property in Bangi n Kajang) - Freehold - Available…	Taman Puchong Intan	Puchong	0	0	Taman Puchong Intan, Puchong	3.01698	101.606	0	0	https://cdn.durianproperty.com.my/images/classified_ads/301622211800302.jpeg	tell hafiz halim saw ad durianproperty get best deal open booking new developed apartment puchong intan officially launch february full loan booking rm bankers cheque deposit rm prefer lock unit free spa legal fees free mot details unit developer reputable developer develop many property bangi n kajang freehold available units units level built sqft rooms bathrooms carpark freehold gated guarded …	tell hafiz halim saw ad durianproperti get best deal open book new develop apart puchong intan offici launch februari full loan book rm banker chequ deposit rm prefer lock unit free spa legal fee free mot detail unit develop reput develop develop mani properti bangi n kajang freehold avail unit unit level built sqft room bathroom carpark freehold gate guard hr secur fasil multipurpos hall manag o…	['tell', 'hafiz', 'halim', 'saw', 'ad', 'durianproperti', 'get', 'best', 'deal', 'open', 'book', 'new', 'develop', 'apart', 'puchong', 'intan', 'offici', 'launch', 'februari', 'full', 'loan', 'book', 'rm', 'banker', 'chequ', 'deposit', 'rm', 'prefer', 'lock', 'unit', 'free', 'spa', 'legal', 'fee', 'free', 'mot', 'detail', 'unit', 'develop', 'reput', 'develop', 'develop', 'mani', 'properti', 'bang…	0	notfake	301622211800302.jpeg	301622211800302	301622211800302.jpeg	FAKE	1	301622211800302.jpeg	jpeg
9397	0	9467	330000	450	1	1	2	1	1	Tell Jas you saw this ad from DurianProperty to get best deal.New Condominium @ Seri Kembangan, Serdang ‚ùóÔ∏è The price it\\\\\\\'s cheap and location with strategic and convenient‚ùóÔ∏è Next to the MRT Station and Shopping Mall is Link with the Residences‚ùóÔ∏è Location : Seri Kembangan, Serdang ‚úÖH.O.C 2020 Project ‚úÖ0% down payment ‚úÖAvailable size 450sqft ~ 864sqft ‚úÖNext to New Lifestyl…	Meta City	Seri Kembangan	0	0	Meta City, Seri Kembangan	2.98273	101.661	0	0	https://cdn.durianproperty.com.my/images/classified_ads/301899811819934.jpeg	tell jas saw ad durianproperty get best deal new condominium seri kembangan serdang price cheap location strategic convenient next mrt station shopping mall link residences location seri kembangan serdang h c project payment available size sqft sqft next new lifestyle shopping mall ultra low payment period rm per month m walking distance apartment mrt station multi highways nearby mex ldp skve mi…	tell ja saw ad durianproperti get best deal new condominium seri kembangan serdang price cheap locat strateg conveni next mrt station shop mall link resid locat seri kembangan serdang h c project payment avail size sqft sqft next new lifestyl shop mall ultra low payment period rm per month m walk distanc apart mrt station multi highway nearbi mex ldp skve min reach giant aeon pasar borong min ioi…	['tell', 'ja', 'saw', 'ad', 'durianproperti', 'get', 'best', 'deal', 'new', 'condominium', 'seri', 'kembangan', 'serdang', 'price', 'cheap', 'locat', 'strateg', 'conveni', 'next', 'mrt', 'station', 'shop', 'mall', 'link', 'resid', 'locat', 'seri', 'kembangan', 'serdang', 'h', 'c', 'project', 'payment', 'avail', 'size', 'sqft', 'sqft', 'next', 'new', 'lifestyl', 'shop', 'mall', 'ultra', 'low', 'pa…	0	notfake	301899811819934.jpeg	301899811819934	301899811819934.jpeg	FAKE	1	301899811819934.jpeg	jpeg
9408	0	9478	9200000	82764	3	0	3	0	3	Tell Lilian Tan you saw this ad from DurianProperty to get best deal.kampung jawa industrial land 1.9acres RM110psf facing the main road freehold Please contact Lilian 012201831You may view Selangor Profile here.	Selangor	Malaysia	0	5	Selangor, Malaysia	3.10338	101.394	0	1	https://cdn.durianproperty.com.my/images/classified_ads/303873811957886.jpeg	tell lilian tan saw ad durianproperty get best deal kampung jawa industrial land acres rmpsf facing main road freehold please contact lilian you may view selangor profile	tell lilian tan saw ad durianproperti get best deal kampung jawa industri land acr rmpsf face main road freehold pleas contact lilian you may view selangor profil	['tell', 'lilian', 'tan', 'saw', 'ad', 'durianproperti', 'get', 'best', 'deal', 'kampung', 'jawa', 'industri', 'land', 'acr', 'rmpsf', 'face', 'main', 'road', 'freehold', 'pleas', 'contact', 'lilian', 'you', 'may', 'view', 'selangor', 'profil']	0	notfake	303873811957886.jpeg	303873811957886	303873811957886.jpeg	FAKE	1	303873811957886.jpeg	jpeg
9450	0	9522	947992	1357	2	1	3	0	2	Tell Gary Lim you saw this ad from DurianProperty to get best deal.JESSELTON TWIN TOWERS Location - Located at Prime Location - Behind KPJ & QE2 - Beside City Mall Kota Kinabalu, Sabah - Surrounded with VIP lots - Government sector - Better Environment __________________________________________________ Accessibility Shopping & Leisure ( within 10 mins drive ) - Imago Shopping Mall - Suria Sabah H…	Jesselton Twin Towers	Kota Kinabalu	11	0	Jesselton Twin Towers, Kota Kinabalu	5.96616	116.098	0	1	https://cdn.durianproperty.com.my/images/classified_ads/303835012000023.jpg	tell gary lim saw ad durianproperty get best deal jesselton twin towers location located prime location behind kpj qe beside city mall kota kinabalu sabah surrounded vip lots government sector better environment accessibility shopping leisure within mins drive imago shopping mall suria sabah healthcare within mins drive hospital queen elizabeth ii kpj sabah hospital gleneagles kota kinabalu educa…	tell gari lim saw ad durianproperti get best deal jesselton twin tower locat locat prime locat behind kpj qe besid citi mall kota kinabalu sabah surround vip lot govern sector better environ access shop leisur within min drive imago shop mall suria sabah healthcar within min drive hospit queen elizabeth ii kpj sabah hospit gleneagl kota kinabalu educ within min drive sabah tshung tsin secondari s…	['tell', 'gari', 'lim', 'saw', 'ad', 'durianproperti', 'get', 'best', 'deal', 'jesselton', 'twin', 'tower', 'locat', 'locat', 'prime', 'locat', 'behind', 'kpj', 'qe', 'besid', 'citi', 'mall', 'kota', 'kinabalu', 'sabah', 'surround', 'vip', 'lot', 'govern', 'sector', 'better', 'environ', 'access', 'shop', 'leisur', 'within', 'min', 'drive', 'imago', 'shop', 'mall', 'suria', 'sabah', 'healthcar', '…	0	notfake	303835012000023.jpg	303835012000023	303835012000023.jpg	FAKE	1	303835012000023.jpg	jpg
9504	0	9576	876000	1120	3	0	3	0	3	Tell Wallace Liew you saw this ad from DurianProperty to get best deal.Vibrant Commercial Centre Bukit Jelutong north of Shah Alam Upscale residential area with ready population over 50,000 Close to industrial and commercial zones - great environment and convenient amenities facilitating employment process Multiple accesses via 4 major expressways - North-South Expressway Central Link (ELITE) - N…	Bukit Jelutong	Shah Alam	0	4	Bukit Jelutong, Shah Alam	3.10714	101.529	0	0	https://cdn.durianproperty.com.my/images/classified_ads/304719412016837.jpg	tell wallace liew saw ad durianproperty get best deal vibrant commercial centre bukit jelutong north shah alam upscale residential area ready population close industrial commercial zones great environment convenient amenities facilitating employment process multiple accesses via major expressways north south expressway central link elite north klang valley expressway nkve guthrie corridor express…	tell wallac liew saw ad durianproperti get best deal vibrant commerci centr bukit jelutong north shah alam upscal residenti area readi popul close industri commerci zone great environ conveni amen facilit employ process multipl access via major expressway north south expressway central link elit north klang valley expressway nkve guthri corridor expressway gce feder highway univers colleg skill l…	['tell', 'wallac', 'liew', 'saw', 'ad', 'durianproperti', 'get', 'best', 'deal', 'vibrant', 'commerci', 'centr', 'bukit', 'jelutong', 'north', 'shah', 'alam', 'upscal', 'residenti', 'area', 'readi', 'popul', 'close', 'industri', 'commerci', 'zone', 'great', 'environ', 'conveni', 'amen', 'facilit', 'employ', 'process', 'multipl', 'access', 'via', 'major', 'expressway', 'north', 'south', 'expresswa…	0	notfake	304719412016837.jpg	304719412016837	304719412016837.jpg	FAKE	1	304719412016837.jpg	jpg
9608	0	9680	9000000	10170	5	1	7	1	5	Tell Rizamudin Mugeni you saw this ad from DurianProperty to get best deal.PARTLY FURNISHED 4 Storey Bungalow House @ Bukit Tunku Key point of this house:- * Balinese concept, glass walls in lush tropical garden * Spiritually rich with Sun Altar, Waterfall * Meditation Cave for the spiritually inclined seeking an ashram ------------------ Zam REN 23050 0165556020 MN Associates Sdn Bhd Hani REN 47…	Sri Bukit Tunku	Kenny Hills	0	3	Sri Bukit Tunku, Kenny Hills	3.16615	101.681	0	0	https://cdn.durianproperty.com.my/images/classified_ads/304816112023396.jpeg	tell rizamudin mugeni saw ad durianproperty get best deal partly furnished storey bungalow house bukit tunku key point house balinese concept glass walls lush tropical garden spiritually rich sun altar waterfall meditation cave spiritually inclined seeking ashram zam ren mn associates sdn bhd hani ren property details build area sqft approximately land area sqft approximately bedrooms bathrooms c…	tell rizamudin mugeni saw ad durianproperti get best deal partli furnish storey bungalow hous bukit tunku key point hous balines concept glass wall lush tropic garden spiritu rich sun altar waterfal medit cave spiritu inclin seek ashram zam ren mn associ sdn bhd hani ren properti detail build area sqft approxim land area sqft approxim bedroom bathroom car park fit car leasehold non bumi lot gate …	['tell', 'rizamudin', 'mugeni', 'saw', 'ad', 'durianproperti', 'get', 'best', 'deal', 'partli', 'furnish', 'storey', 'bungalow', 'hous', 'bukit', 'tunku', 'key', 'point', 'hous', 'balines', 'concept', 'glass', 'wall', 'lush', 'tropic', 'garden', 'spiritu', 'rich', 'sun', 'altar', 'waterfal', 'medit', 'cave', 'spiritu', 'inclin', 'seek', 'ashram', 'zam', 'ren', 'mn', 'associ', 'sdn', 'bhd', 'hani'…	0	notfake	304816112023396.jpeg	304816112023396	304816112023396.jpeg	FAKE	1	304816112023396.jpeg	jpeg
9665	0	9737	620000	1314	2	1	3	0	2	Tell Dino Teh you saw this ad from DurianProperty to get best deal.Details: - Freehold Residential (Ê∞∏‰πÖÂú∞Â•ë) - Grand City View (Â∏ÇÂå∫Ôºâ - 1,314sf built-up (1,314Âπ≥ÊñπÂ∞∫Ôºâ - 3 Rooms, 2 Bath (with Balcony) (3Êàø2Êµ¥,ÊúâÈò≥Âè∞Ôºâ - Mid Floor Level (‰∏≠Èó¥Ê•ºÂ±Ç) - Dry & Wet Kitchen (ÂàÜÈöîÂπ≤ÔºåÊπøÂé®Êàø) - 5 Inverter Air-cond. (5Á≤íÂÜ∑Ê∞î) - 2 storage water heater Ôºà2Á≤íÁÉ≠Ê∞¥Ôºâ - 2 Car…	Setia Pinnacle	Sungai Ara	4	0	Setia Pinnacle, Sungai Ara	5.33585	100.264	0	0	https://cdn.durianproperty.com.my/images/classified_ads/300830111746079.jpeg	tell dino teh saw ad durianproperty get best deal details freehold residential freehold grand city view urban area sf built square feet rooms bath balcony bedrooms bathrooms balcony mid floor level middle floor dry wet kitchen separate dry wet kitchen inverter air cond air conditioners storage water heater hot water car park parking spaces rm view appreciate facilities apartment facilities swimmi…	tell dino teh saw ad durianproperti get best deal detail freehold residenti freehold grand citi view urban area sf built squar feet room bath balconi bedroom bathroom balconi mid floor level middl floor dri wet kitchen separ dri wet kitchen invert air cond air condition storag water heater hot water car park park space rm view appreci facil apart facil swim pool swim pool children pool children p…	['tell', 'dino', 'teh', 'saw', 'ad', 'durianproperti', 'get', 'best', 'deal', 'detail', 'freehold', 'residenti', 'freehold', 'grand', 'citi', 'view', 'urban', 'area', 'sf', 'built', 'squar', 'feet', 'room', 'bath', 'balconi', 'bedroom', 'bathroom', 'balconi', 'mid', 'floor', 'level', 'middl', 'floor', 'dri', 'wet', 'kitchen', 'separ', 'dri', 'wet', 'kitchen', 'invert', 'air', 'cond', 'air', 'cond…	0	notfake	300830111746079.jpeg	300830111746079	300830111746079.jpeg	FAKE	1	300830111746079.jpeg	jpeg
9675	0	9747	360000	1100	2	1	4	0	2	Tell Seah you saw this ad from DurianProperty to get best deal.Taman Markisah Juru / Bukit minyak 1 storey semi D Bu 1000 sf La 2250 sf 4 rooms 3 bath - Freehold Rm 350k - Nearby Restaurant, Residential Area, Petrol Station, Mini Market, School, Aeon mall and etc... - Easy Access to Penang Bridge, Icon City, Alma, Bukit Tengah, Bukit Minyak, Juru and etc... Please see more of my listings at http:…	Taman Markisah	Bukit Mertajam	4	2	Taman Markisah, Bukit Mertajam	5.31965	100.463	0	0	https://cdn.durianproperty.com.my/images/classified_ads/302425311859843.jpg	tell seah saw ad durianproperty get best deal taman markisah juru bukit minyak storey semi bu sf la sf rooms bath freehold rm k nearby restaurant residential area petrol station mini market school aeon mall etc easy access penang bridge icon city alma bukit tengah bukit minyak juru etc please see listings may view taman markisah profile	tell seah saw ad durianproperti get best deal taman markisah juru bukit minyak storey semi bu sf la sf room bath freehold rm k nearbi restaur residenti area petrol station mini market school aeon mall etc easi access penang bridg icon citi alma bukit tengah bukit minyak juru etc pleas see list may view taman markisah profil	['tell', 'seah', 'saw', 'ad', 'durianproperti', 'get', 'best', 'deal', 'taman', 'markisah', 'juru', 'bukit', 'minyak', 'storey', 'semi', 'bu', 'sf', 'la', 'sf', 'room', 'bath', 'freehold', 'rm', 'k', 'nearbi', 'restaur', 'residenti', 'area', 'petrol', 'station', 'mini', 'market', 'school', 'aeon', 'mall', 'etc', 'easi', 'access', 'penang', 'bridg', 'icon', 'citi', 'alma', 'bukit', 'tengah', 'buki…	0	notfake	302425311859843.jpg	302425311859843	302425311859843.jpg	FAKE	1	302425311859843.jpg	jpg
9910	0	9986	224000	635	1	0	2	0	2	Tell Nicholes you saw this ad from DurianProperty to get best deal.************************************************************** Bank Lelong -20% Tiara Imperio, Jalan Ilmiah 1, Kajang ************************************************************** Alamat : A-22-17, Block A, Tiara Imperio, Jalan Ilmiah 1, Kajang, Selangor * Lelong price : RM 224,000 * Market value : RM 280,000 Tarikh lelong : 16 O…	Tiara Imperio	Kajang	0	0	Tiara Imperio, Kajang	2.93651	101.798	0	1	https://cdn.durianproperty.com.my/images/classified_ads/305165012048904.jpg	tell nicholes saw ad durianproperty get best deal bank lelong tiara imperio jalan ilmiah kajang alamat block tiara imperio jalan ilmiah kajang selangor lelong price rm market value rm tarikh lelong october property details level soho built sf malay owner freehold photographs shown herein solely general identification reference purpose intended form part contract warranty registration untuk daftar…	tell nichol saw ad durianproperti get best deal bank lelong tiara imperio jalan ilmiah kajang alamat block tiara imperio jalan ilmiah kajang selangor lelong price rm market valu rm tarikh lelong octob properti detail level soho built sf malay owner freehold photograph shown herein sole gener identif refer purpos intend form part contract warranti registr untuk daftar whatsapp sm full name ic numb…	['tell', 'nichol', 'saw', 'ad', 'durianproperti', 'get', 'best', 'deal', 'bank', 'lelong', 'tiara', 'imperio', 'jalan', 'ilmiah', 'kajang', 'alamat', 'block', 'tiara', 'imperio', 'jalan', 'ilmiah', 'kajang', 'selangor', 'lelong', 'price', 'rm', 'market', 'valu', 'rm', 'tarikh', 'lelong', 'octob', 'properti', 'detail', 'level', 'soho', 'built', 'sf', 'malay', 'owner', 'freehold', 'photograph', 'sh…	0	notfake	305165012048904.jpg	305165012048904	305165012048904.jpg	FAKE	1	305165012048904.jpg	jpg
9934	0	10010	3000000	15000	3	0	1	0	3	Tell TeammyLee you saw this ad from DurianProperty to get best deal.USJ 16/3B commercial land for sale - freehold - 100x150ft deep -land area 15000sf - square -prime area -easy access - surrounding are link houses within a well establish gated and guarded community Teammy Lee 019-698 7777You may view USJ Profile here.	USJ	Subang Jaya	0	5	USJ, Subang Jaya	3.05709	101.591	0	0	https://cdn.durianproperty.com.my/images/classified_ads/304276111987980.jpeg	tell teammylee saw ad durianproperty get best deal usj b commercial land sale freehold xft deep land area sf square prime area easy access surrounding link houses within well establish gated guarded community teammy lee you may view usj profile	tell teammyle saw ad durianproperti get best deal usj b commerci land sale freehold xft deep land area sf squar prime area easi access surround link hous within well establish gate guard commun teammi lee you may view usj profil	['tell', 'teammyle', 'saw', 'ad', 'durianproperti', 'get', 'best', 'deal', 'usj', 'b', 'commerci', 'land', 'sale', 'freehold', 'xft', 'deep', 'land', 'area', 'sf', 'squar', 'prime', 'area', 'easi', 'access', 'surround', 'link', 'hous', 'within', 'well', 'establish', 'gate', 'guard', 'commun', 'teammi', 'lee', 'you', 'may', 'view', 'usj', 'profil']	0	notfake	304276111987980.jpeg	304276111987980	304276111987980.jpeg	FAKE	1	304276111987980.jpeg	jpeg
9967	0	10043	450000	399	1	0	1	0	0	Subang New Service Apartment. Near to five-star hotel and Medical Centre. Branded Developer. >Free Hold >Commercial Title >Full furnished, built up .- . >21 storey of 3 tower, each tower 6 lifts >Level 4 and top roof facilities >Expected completion 48months >Maintenance fee RM0.35 per . included shinking funds >SPA Price From RM450k+(Special Promotion) >Booking RM50 Subang New Service Apartment P…	Dorsett Place	Subang Jaya	0	0	Dorsett Place, Subang Jaya	3.07923	101.595	0	0	https://cdn.durianproperty.com.my/images/classified_ads/299644611666957.jpeg	subang new service apartment near five star hotel medical centre branded developer free hold commercial title full furnished built storey tower tower lifts level top roof facilities expected completion months maintenance fee rm per included shinking funds spa price rmk special promotion booking rm subang new service apartment package free p legal fee free loan legal fee disbursement stamp duty bo…	subang new servic apart near five star hotel medic centr brand develop free hold commerci titl full furnish built storey tower tower lift level top roof facil expect complet month mainten fee rm per includ shink fund spa price rmk special promot book rm subang new servic apart packag free p legal fee free loan legal fee disburs stamp duti book enjoy earli bird prioriti cancel withdraw loan reject…	['subang', 'new', 'servic', 'apart', 'near', 'five', 'star', 'hotel', 'medic', 'centr', 'brand', 'develop', 'free', 'hold', 'commerci', 'titl', 'full', 'furnish', 'built', 'storey', 'tower', 'tower', 'lift', 'level', 'top', 'roof', 'facil', 'expect', 'complet', 'month', 'mainten', 'fee', 'rm', 'per', 'includ', 'shink', 'fund', 'spa', 'price', 'rmk', 'special', 'promot', 'book', 'rm', 'subang', 'n…	0	notfake	299644611666957.jpeg	299644611666957	299644611666957.jpeg	FAKE	1	299644611666957.jpeg	jpeg
10046	0	10126	666000	2100	5	1	5	1	3	Tell Connie Chew you saw this ad from DurianProperty to get best deal.PUCHONG‚ÄôS NEWEST >> LAKEFRONT RESORT LIVING A stunning lakefront condo in Puchong that promises luxurious lifestyle living amidst a resort setting. Selected units are designed to offer unobstructed panoramic views of the lake and beyond, right from its balcony. With so much living space to play with, you can enjoy the creativ…	Bandar Bukit Puchong	Puchong	0	0	Bandar Bukit Puchong, Puchong	2.98803	101.619	0	1	https://cdn.durianproperty.com.my/images/classified_ads/278658211619070.jpg	tell connie chew saw ad durianproperty get best deal puchong newest lakefront resort living stunning lakefront condo puchong promises luxurious lifestyle living amidst resort setting selected units designed offer unobstructed panoramic views lake beyond right balcony much living space play enjoy creativity planning decorating ideal home world lifestyle activities awaits savour exciting moments ri…	tell conni chew saw ad durianproperti get best deal puchong newest lakefront resort live stun lakefront condo puchong promis luxuri lifestyl live amidst resort set select unit design offer unobstruct panoram view lake beyond right balconi much live space play enjoy creativ plan decor ideal home world lifestyl activ await savour excit moment right besid lake rejuven resid clubhous kid look forward…	['tell', 'conni', 'chew', 'saw', 'ad', 'durianproperti', 'get', 'best', 'deal', 'puchong', 'newest', 'lakefront', 'resort', 'live', 'stun', 'lakefront', 'condo', 'puchong', 'promis', 'luxuri', 'lifestyl', 'live', 'amidst', 'resort', 'set', 'select', 'unit', 'design', 'offer', 'unobstruct', 'panoram', 'view', 'lake', 'beyond', 'right', 'balconi', 'much', 'live', 'space', 'play', 'enjoy', 'creativ'…	0	notfake	278658211619070.jpg	278658211619070	278658211619070.jpg	FAKE	1	278658211619070.jpg	jpg
10050	0	10130	1245888	3230	3	0	3	1	3	Tell Jimmy Goh you saw this ad from DurianProperty to get best deal.Â•ΩÊ∂àÊÅØÂÖ®È©¨ÊúÄÂÄºÂæó‰π∞ÁöÑÂ∑•ÂéÇ ÔºåÂ∞±Âú®ÂçóÂåóÂΩìÈÅìËæπNorth-South Expressway Ôºå‰π∞Âà∞ËÇØÂÆöËµöÂà∞„ÄÇ Êñ∞Â∑•ÂéÇ‰∏ÄÂ±ÇÂçäÂ∑•ÂéÇ(1.5 Sty) Pls Contact Jimmy Goh 012-202 9977 for listing (Q 2347) Land Area : 30 x 80 Built Up: 3,230 sf RM 1,245,888 Land Area : 36 x 80 Built Up: 3,900 sf RM 1,494,688 2 Access entrance 80 ft 24 H…	Taman Industri Sungai Buloh	Petaling Jaya	0	4	Taman Industri Sungai Buloh, Petaling Jaya	3.16458	101.572	0	0	https://cdn.durianproperty.com.my/images/classified_ads/295961111414766.jpg	tell jimmy goh saw ad durianproperty get best deal good news worthwhile factory malaysia located north south expressway buy definitely make money new factory one half floors factory sty pls contact jimmy goh listing q land area x built sf rm land area x built sf rm access entrance ft hour security gated community front road ft back road ft front roller shutter high ft back roller shutter high ft …	tell jimmi goh saw ad durianproperti get best deal good news worthwhil factori malaysia locat north south expressway buy definit make money new factori one half floor factori sti pl contact jimmi goh list q land area x built sf rm land area x built sf rm access entranc ft hour secur gate commun front road ft back road ft front roller shutter high ft back roller shutter high ft problem still rent …	['tell', 'jimmi', 'goh', 'saw', 'ad', 'durianproperti', 'get', 'best', 'deal', 'good', 'news', 'worthwhil', 'factori', 'malaysia', 'locat', 'north', 'south', 'expressway', 'buy', 'definit', 'make', 'money', 'new', 'factori', 'one', 'half', 'floor', 'factori', 'sti', 'pl', 'contact', 'jimmi', 'goh', 'list', 'q', 'land', 'area', 'x', 'built', 'sf', 'rm', 'land', 'area', 'x', 'built', 'sf', 'rm', 'a…	0	notfake	295961111414766.jpg	295961111414766	295961111414766.jpg	FAKE	1	295961111414766.jpg	jpg
10095	0	10176	38000	261360	0	0	0	1	0	Tell sanusi you saw this ad from DurianProperty to get best deal.KEBUN GETAH KG SG LIK KUALA LIPIS PAHANG. * Harga 38k per ekar * Luas 6 ekar * Pajakan 60 th / 2056 * Non Bumi * Lot ke 2 * Umur pokok 16 tahun * Kuala Lipis 40km For Details & Viewing, please call/sms/ whatsapp: SANUSI 017-6029400 REN 00149 Real Estate Negotiator Afz Realty Sdn Bhd Vepm (1) 0006You may view Pahang Profile here.	Pahang	Malaysia	8	5	Pahang, Malaysia	3.97434	102.438	0	0	https://cdn.durianproperty.com.my/images/classified_ads/300228311702836.jpeg	tell sanusi saw ad durianproperty get best deal kebun getah kg sg lik kuala lipis pahang harga k per ekar luas ekar pajakan th non bumi lot ke umur pokok tahun kuala lipis km details viewing please call sms whatsapp sanusi ren real estate negotiator afz realty sdn bhd vepm you may view pahang profile	tell sanusi saw ad durianproperti get best deal kebun getah kg sg lik kuala lipi pahang harga k per ekar lua ekar pajakan th non bumi lot ke umur pokok tahun kuala lipi km detail view pleas call sm whatsapp sanusi ren real estat negoti afz realti sdn bhd vepm you may view pahang profil	['tell', 'sanusi', 'saw', 'ad', 'durianproperti', 'get', 'best', 'deal', 'kebun', 'getah', 'kg', 'sg', 'lik', 'kuala', 'lipi', 'pahang', 'harga', 'k', 'per', 'ekar', 'lua', 'ekar', 'pajakan', 'th', 'non', 'bumi', 'lot', 'ke', 'umur', 'pokok', 'tahun', 'kuala', 'lipi', 'km', 'detail', 'view', 'pleas', 'call', 'sm', 'whatsapp', 'sanusi', 'ren', 'real', 'estat', 'negoti', 'afz', 'realti', 'sdn', 'bh…	0	notfake	300228311702836.jpeg	300228311702836	300228311702836.jpeg	FAKE	1	300228311702836.jpeg	jpeg
10110	0	10191	443610	1314	3	1	4	0	3	Tell Raduan Jemain you saw this ad from DurianProperty to get best deal.TAMAN SEMARAK WARISAN Open For Sale (Kota Warisan Sepang) :star: Beli rumah Location paling *MANTOP* :star: 0% down Payment free all legal fee :star: Townships & Perimeter Fencing & Guarded House OPEN UNTUK BOOKING PHASE 1 ~CLOVER~ Type RT 1:Double storey Land Size: 20 x 63 Bulit Up: 1460sf Room/Bath: 4/3 Total unit : 75 unit…	Kota Warisan	Sepang	0	1	Kota Warisan, Sepang	2.82422	101.696	0	0	https://cdn.durianproperty.com.my/images/classified_ads/300569711726747.jpg	tell raduan jemain saw ad durianproperty get best deal taman semarak warisan open sale kota warisan sepang star beli rumah location paling mantop star payment free legal fee star townships perimeter fencing guarded house open untuk booking phase clover type rt double storey land size x bulit sf room bath total unit unit price rm type rt double storey land size x build sf room bath total unit unit…	tell raduan jemain saw ad durianproperti get best deal taman semarak warisan open sale kota warisan sepang star beli rumah locat pale mantop star payment free legal fee star township perimet fenc guard hous open untuk book phase clover type rt doubl storey land size x bulit sf room bath total unit unit price rm type rt doubl storey land size x build sf room bath total unit unit price rm earli bir…	['tell', 'raduan', 'jemain', 'saw', 'ad', 'durianproperti', 'get', 'best', 'deal', 'taman', 'semarak', 'warisan', 'open', 'sale', 'kota', 'warisan', 'sepang', 'star', 'beli', 'rumah', 'locat', 'pale', 'mantop', 'star', 'payment', 'free', 'legal', 'fee', 'star', 'township', 'perimet', 'fenc', 'guard', 'hous', 'open', 'untuk', 'book', 'phase', 'clover', 'type', 'rt', 'doubl', 'storey', 'land', 'siz…	0	notfake	300569711726747.jpg	300569711726747	300569711726747.jpg	FAKE	1	300569711726747.jpg	jpg
10136	0	10217	530000	860	2	1	3	1	2	Tell Lim wai mun you saw this ad from DurianProperty to get best deal.Luxury Condo @ Seri Kembangan/Serdang __First Township Development along the Seri Kembangan__ ** Condominium ** Total 12 acres land with only 2 Block Residence Affordable Medium end Condominium with Gated & Guarded,Access card system,24 hours security ** Shopping Mall ** Vibrant Lifestyle Mall that comprise F&B, Grocery market,…	Meta City	Seri Kembangan	0	0	Meta City, Seri Kembangan	2.98273	101.661	0	0	https://cdn.durianproperty.com.my/images/classified_ads/300764611741150.png	tell lim wai mun saw ad durianproperty get best deal luxury condo seri kembangan serdang first township development along seri kembangan condominium total acres land block residence affordable medium end condominium gated guarded access card system hours security shopping mall vibrant lifestyle mall comprise f b grocery market retails shop entertainment cinema ice skating etc concept similar ioi …	tell lim wai mun saw ad durianproperti get best deal luxuri condo seri kembangan serdang first township develop along seri kembangan condominium total acr land block resid afford medium end condominium gate guard access card system hour secur shop mall vibrant lifestyl mall compris f b groceri market retail shop entertain cinema ice skate etc concept similar ioi citi mall brand star intern hotel …	['tell', 'lim', 'wai', 'mun', 'saw', 'ad', 'durianproperti', 'get', 'best', 'deal', 'luxuri', 'condo', 'seri', 'kembangan', 'serdang', 'first', 'township', 'develop', 'along', 'seri', 'kembangan', 'condominium', 'total', 'acr', 'land', 'block', 'resid', 'afford', 'medium', 'end', 'condominium', 'gate', 'guard', 'access', 'card', 'system', 'hour', 'secur', 'shop', 'mall', 'vibrant', 'lifestyl', 'm…	0	notfake	300764611741150.png	300764611741150	300764611741150.png	FAKE	1	300764611741150.png	png
10141	0	10223	520000	900	2	2	5	0	3	Tell Goh chang jun you saw this ad from DurianProperty to get best deal.MCO Special Offer !!! Bloomsvale!!! Call to get info ~ Cash Rebate ~!! FREEHOLD B1 to B3 : Commercial car park Level G : Retail Mall, Concierge, Service Residence, Office & Hotel Drop off Level 1 & 2nd : Retail mall Level 3 : Hotel Banquet Hall, Hotel Meeting Room & Hotel All day Dining Level 4 ‚Äì 10 : Residence Carpark Leve…	BloomsVale	Old Klang Road	0	0	BloomsVale, Old Klang Road	3.0754	101.661	0	0	https://cdn.durianproperty.com.my/images/classified_ads/302496511865082.png	tell goh chang jun saw ad durianproperty get best deal mco special offer bloomsvale call get info cash rebate freehold b b commercial car park level g retail mall concierge service residence office hotel drop level nd retail mall level hotel banquet hall hotel meeting room hotel day dining level residence carpark level residential facility level residential units level a private area rb rb rb rb …	tell goh chang jun saw ad durianproperti get best deal mco special offer bloomsval call get info cash rebat freehold b b commerci car park level g retail mall concierg servic resid offic hotel drop level nd retail mall level hotel banquet hall hotel meet room hotel day dine level resid carpark level residenti facil level residenti unit level a privat area rb rb rb rb fulli furnish limit time smar…	['tell', 'goh', 'chang', 'jun', 'saw', 'ad', 'durianproperti', 'get', 'best', 'deal', 'mco', 'special', 'offer', 'bloomsval', 'call', 'get', 'info', 'cash', 'rebat', 'freehold', 'b', 'b', 'commerci', 'car', 'park', 'level', 'g', 'retail', 'mall', 'concierg', 'servic', 'resid', 'offic', 'hotel', 'drop', 'level', 'nd', 'retail', 'mall', 'level', 'hotel', 'banquet', 'hall', 'hotel', 'meet', 'room', …	0	notfake	302496511865082.png	302496511865082	302496511865082.png	FAKE	1	302496511865082.png	png
10150	0	10232	263000	860	2	0	3	1	1	Tell A Abang Zuhaili you saw this ad from DurianProperty to get best deal.RESIDENSI LARKIN INDAH, JOHOR BAHRU, JOHOR Kediaman yang terletak di kawasan yang strategik, kondusif dan berkualiti DETAILS: Project Name: Residensi Larkin Indah Project Type: Apartment Developer: PR1MA CORPORATION MALAYSIA Tenure: Leasehold 99 Yrs (2109) Price: RM246,368 - RM310,322 Completion Year: 2023 FACILITIES: - Mul…	Larkin Indah	Johor Bahru	2	0	Larkin Indah, Johor Bahru	1.49615	103.738	0	0	https://cdn.durianproperty.com.my/images/classified_ads/305011212037060.png	tell abang zuhaili saw ad durianproperty get best deal residensi larkin indah johor bahru johor kediaman yang terletak di kawasan yang strategik kondusif dan berkualiti details project name residensi larkin indah project type apartment developer prma corporation malaysia tenure leasehold yrs price rm rm completion year facilities multipurpose hall surau kindergarten nursery management office tari…	tell abang zuhaili saw ad durianproperti get best deal residensi larkin indah johor bahru johor kediaman yang terletak di kawasan yang strategik kondusif dan berkual detail project name residensi larkin indah project type apart develop prma corpor malaysia tenur leasehold yr price rm rm complet year facil multipurpos hall surau kindergarten nurseri manag offic tarikan menarik kpj puteri specialis…	['tell', 'abang', 'zuhaili', 'saw', 'ad', 'durianproperti', 'get', 'best', 'deal', 'residensi', 'larkin', 'indah', 'johor', 'bahru', 'johor', 'kediaman', 'yang', 'terletak', 'di', 'kawasan', 'yang', 'strategik', 'kondusif', 'dan', 'berkual', 'detail', 'project', 'name', 'residensi', 'larkin', 'indah', 'project', 'type', 'apart', 'develop', 'prma', 'corpor', 'malaysia', 'tenur', 'leasehold', 'yr',…	0	notfake	305011212037060.png	305011212037060	305011212037060.png	FAKE	1	305011212037060.png	png
10155	0	10237	1000000	2587	4	0	4	0	2	Tell En. Iszsyam you saw this ad from DurianProperty to get best deal.[ TITLE ] : [ SUPERB ] - 2Sty HOUSE ( SEMI-D ) + ( CORNER ) Setia Ecohill SEMENYIH . :: LOCATION :: Setia Ecohill, Semenyih . :: BIGGEST EXTRA LAND FOR CORNER LOT SEMI -D HOUSE ! :: DETAILS :: - SEMI -D House - CORNER LOT ( with extra land ) - Freehold ( Non Bumi Lot ) - Land Area : 3915 sqft - Built up: 2587 sqft - 4 rooms 4 B…	Setia Ecohill	Semenyih	0	2	Setia Ecohill, Semenyih	2.94744	101.845	0	1	https://cdn.durianproperty.com.my/images/classified_ads/302788511885140.jpg	tell en iszsyam saw ad durianproperty get best deal title superb sty house semi corner setia ecohill semenyih location setia ecohill semenyih biggest extra land corner lot semi house details semi house corner lot extra land freehold non bumi lot land area sqft built sqft rooms baths close park spacious parking space safety features gated guarded tier boom gate system anti tale gating feature high…	tell en iszsyam saw ad durianproperti get best deal titl superb sti hous semi corner setia ecohil semenyih locat setia ecohil semenyih biggest extra land corner lot semi hous detail semi hous corner lot extra land freehold non bumi lot land area sqft built sqft room bath close park spaciou park space safeti featur gate guard tier boom gate system anti tale gate featur high tech anti climb secur f…	['tell', 'en', 'iszsyam', 'saw', 'ad', 'durianproperti', 'get', 'best', 'deal', 'titl', 'superb', 'sti', 'hous', 'semi', 'corner', 'setia', 'ecohil', 'semenyih', 'locat', 'setia', 'ecohil', 'semenyih', 'biggest', 'extra', 'land', 'corner', 'lot', 'semi', 'hous', 'detail', 'semi', 'hous', 'corner', 'lot', 'extra', 'land', 'freehold', 'non', 'bumi', 'lot', 'land', 'area', 'sqft', 'built', 'sqft', '…	0	notfake	302788511885140.jpg	302788511885140	302788511885140.jpg	FAKE	1	302788511885140.jpg	jpg
10162	0	10244	351000	880	2	0	3	1	2	Tell HABIBAH you saw this ad from DurianProperty to get best deal.Single Storey at Jalan Pipit 5/58 & 5/60 Taman Bentara,Telok Panglima Garang, Kuala Langat, Selangor. Property Type: Single Storey Intermediate unit LeaseHold, Malay reserve Title Type: Individual Land Area: 20 X 69 Build up: 20x44 Bedrooms: 3 Bathrooms: 2 Parking: 2 24 hours security AMENITIES & FACILITIES: 1) Playground 2) Surau/…	Taman Bentara	Telok Panglima Garang	0	1	Taman Bentara, Telok Panglima Garang	2.9355	101.501	0	0	https://cdn.durianproperty.com.my/images/classified_ads/304542612006120.jpg	tell habibah saw ad durianproperty get best deal single storey jalan pipit taman bentara telok panglima garang kuala langat selangor property type single storey intermediate unit leasehold malay reserve title type individual land area x build x bedrooms bathrooms parking hours security amenities facilities playground surau masjid tesco jenjarom aeon bukit tinggi giant banting secondary primary sc…	tell habibah saw ad durianproperti get best deal singl storey jalan pipit taman bentara telok panglima garang kuala langat selangor properti type singl storey intermedi unit leasehold malay reserv titl type individu land area x build x bedroom bathroom park hour secur amen facil playground surau masjid tesco jenjarom aeon bukit tinggi giant bant secondari primari school polic station fire station…	['tell', 'habibah', 'saw', 'ad', 'durianproperti', 'get', 'best', 'deal', 'singl', 'storey', 'jalan', 'pipit', 'taman', 'bentara', 'telok', 'panglima', 'garang', 'kuala', 'langat', 'selangor', 'properti', 'type', 'singl', 'storey', 'intermedi', 'unit', 'leasehold', 'malay', 'reserv', 'titl', 'type', 'individu', 'land', 'area', 'x', 'build', 'x', 'bedroom', 'bathroom', 'park', 'hour', 'secur', 'am…	0	notfake	304542612006120.jpg	304542612006120	304542612006120.jpg	FAKE	1	304542612006120.jpg	jpg
10176	0	10258	2600000	2977	3	0	3	0	3	Tell Warda Mustapha you saw this ad from DurianProperty to get best deal.SHOP LOT, AYER 8, Putrajaya. For Rent : RM 8,000 (nego) For Sale : RM 2,600,000 Ayer 8, Presint 8, WP Putrajaya. Block A (2nd floor) Size : 2,977 sqft (65 x 45) Rental per month : RM 8,000 (Negotiable) Rental free period : 1 month Condition of units : Bare unit (Suitable for Office) Amenities: Nearby restaurants such as Papp…	Precinct 8	Putrajaya	10	6	Precinct 8, Putrajaya	2.93292	101.679	0	0	https://cdn.durianproperty.com.my/images/classified_ads/303445811929571.jpg	tell warda mustapha saw ad durianproperty get best deal shop lot ayer putrajaya rent rm nego sale rm ayer presint wp putrajaya block nd floor size sqft x rental per month rm negotiable rental free period month condition units bare unit suitable office amenities nearby restaurants papparich she will mcdonalds marrybrown teh tarik place many others surau saidina umar al khattab iron mosque masjid t…	tell warda mustapha saw ad durianproperti get best deal shop lot ayer putrajaya rent rm nego sale rm ayer presint wp putrajaya block nd floor size sqft x rental per month rm negoti rental free period month condit unit bare unit suitabl offic amen nearbi restaur papparich she will mcdonald marrybrown teh tarik place mani other surau saidina umar al khattab iron mosqu masjid tuanku mizan zainal abi…	['tell', 'warda', 'mustapha', 'saw', 'ad', 'durianproperti', 'get', 'best', 'deal', 'shop', 'lot', 'ayer', 'putrajaya', 'rent', 'rm', 'nego', 'sale', 'rm', 'ayer', 'presint', 'wp', 'putrajaya', 'block', 'nd', 'floor', 'size', 'sqft', 'x', 'rental', 'per', 'month', 'rm', 'negoti', 'rental', 'free', 'period', 'month', 'condit', 'unit', 'bare', 'unit', 'suitabl', 'offic', 'amen', 'nearbi', 'restaur'…	0	notfake	303445811929571.jpg	303445811929571	303445811929571.jpg	FAKE	1	303445811929571.jpg	jpg
10178	0	10260	1602000	1098	2	2	2	0	1	Tell Tiffany Tang you saw this ad from DurianProperty to get best deal.LIMITED TIME BUYER'S PACKAGE AVAILABLE! GRAB THIS OFFER TODAY! FULLY FURNISHED, FREEHOLD, AMPANG HILIR (2-BEDROOM) LUXURY RESIDENCE! CALL 012-224 8866 FOR SUPER PROMO!! We focus on Luxury Residential in KLCC, Ampang Hilir, Bukit Tunku, Damansara, Bangsar, KL City, PJ and other parts of Klang Valley. Feel free to contact Tiffan…	Pavilion Embassy	KL City Centre	1	0	Pavilion Embassy, KL City Centre	3.16059	101.724	0	0	https://cdn.durianproperty.com.my/images/classified_ads/300275611705714.jpg	tell tiffany tang saw ad durianproperty get best deal limited time buyer package available grab offer today fully furnished freehold ampang hilir bedroom luxury residence call super promo focus luxury residential klcc ampang hilir bukit tunku damansara bangsar kl city pj parts klang valley feel free contact tiffany whatsapp tiffany find perfect dream home pavilion embassy service suites pavilion …	tell tiffani tang saw ad durianproperti get best deal limit time buyer packag avail grab offer today fulli furnish freehold ampang hilir bedroom luxuri resid call super promo focu luxuri residenti klcc ampang hilir bukit tunku damansara bangsar kl citi pj part klang valley feel free contact tiffani whatsapp tiffani find perfect dream home pavilion embassi servic suit pavilion embassi acr freehold…	['tell', 'tiffani', 'tang', 'saw', 'ad', 'durianproperti', 'get', 'best', 'deal', 'limit', 'time', 'buyer', 'packag', 'avail', 'grab', 'offer', 'today', 'fulli', 'furnish', 'freehold', 'ampang', 'hilir', 'bedroom', 'luxuri', 'resid', 'call', 'super', 'promo', 'focu', 'luxuri', 'residenti', 'klcc', 'ampang', 'hilir', 'bukit', 'tunku', 'damansara', 'bangsar', 'kl', 'citi', 'pj', 'part', 'klang', 'v…	1	fake	300275611705714.jpg	300275611705714	300275611705714.jpg	FAKE	1	300275611705714.jpg	jpg
[truncated: 5,784 more rows]
